# Supplementary material for: The syndemic condition of psychosocial problems related to depression among sexually transmitted infections patients
Source: PeerJ. 2021 Sep 21;9:e12022. doi: 10.7717/peerj.12022 (PMC8462369; doi:10.7717/peerj.12022)
Supplement: Supplemental Information 1 [file peerj-09-12022-s001.xlsx]

## Sheet: Supplemental file 1(raw data)
	social support												self-esteem										loneliness								depression									entrapment
	D1_1	D2_1	D3_1	D4_1	D5_1	D6_1	D7_1	D8_1	D9_1	D10_1	D11_1	D12_1	G11_1	G12_1	G13_1	G14_1	G15_1	G16_1	G17_1	G18_1	G19_1	G110_1	G21_1	G22_1	G23_1	G24_1	G25_1	G26_1	G27_1	G28_1	G31_1	G32_1	G33_1	G34_1	G35_1	G36_1	G37_1	G38_1	G39_1	G41_1	G42_1	G43_1	G44_1	G45_1	G46_1	G47_1	G48_1	G49_1	G410_1
	7	7	6	7	7	7	6	7	7	7	7	7	3	0	1	0	0	3	0	3	3	3	1	3	4	1	4	4	1	2	0	1	1	0	0	0	0	0	0	0	0	0	0	0	0	0	0	0	0
	4	3	5	5	4	4	1	5	2	3	5	2	2	2	1	2	2	1	1	1	1	1	4	3	3	2	2	2	2	2	1	1	2	1	3	1	0	0	0	1	1	2	2	2	3	1	1	2	2
	6	7	7	6	7	7	7	6	7	7	5	7	2	2	2	2	2	2	2	2	2	2	1	1	1	1	1	1	1	1	1	1	1	1	1	0	0	1	0	2	1	2	1	1	1	1	1	1	2
	4	2	6	6	4	4	1	3	3	2	5	1	1	2	2	2	1	2	2	2	1	2	3	2	3	2	1	2	1	1	1	1	1	1	0	1	1	0	0	3	2	1	3	3	2	2	1	1	1
	2	4	2	2	6	7	4	1	7	6	2	6	2	2	1	2	1	1	1	1	1	1	1	1	1	3	3	1	3	3	0	1	0	0	0	0	0	0	0	4	4	2	2	4	4	4	3	4	4
	6	6	6	6	6	6	6	6	6	6	5	6	2	2	1	2	1	2	2	0	2	2	2	2	2	3	3	3	3	2	1	1	1	1	1	1	1	1	0	1	1	1	1	1	1	1	1	1	1
	6	7	7	6	7	7	7	6	7	7	5	7	2	2	2	2	2	2	2	2	2	2	1	1	1	1	1	4	1	2	1	1	1	1	1	0	0	1	0	1	0	1	0	0	0	0	0	0	1
	4	2	6	6	4	4	1	3	3	2	5	1	1	2	2	2	1	2	2	2	1	2	3	2	3	2	1	2	1	1	1	1	1	1	0	1	1	0	0	2	1	0	2	2	1	1	0	0	0
	6	6	5	4	5	6	6	1	5	6	5	6	3	3	2	3	2	2	2	2	2	2	4	1	3	3	3	1	3	4	1	1	1	1	1	1	0	1	0	2	3	0	2	4	4	3	0	2	0
	6	6	6	5	4	2	2	2	6	5	5	6	3	3	2	3	2	3	3	2	3	3	3	2	2	1	1	1	1	2	1	0	0	0	0	0	0	0	0	0	0	0	0	1	0	0	2	1	0
	4	4	4	3	3	2	2	3	4	4	4	4	2	2	2	2	2	2	1	1	1	2	3	3	1	3	3	1	1	2	1	1	1	1	1	0	0	0	1	2	2	0	2	2	2	2	2	2	0
	4	3	7	7	3	3	3	7	4	5	4	3	1	1	1	2	1	1	1	1	1	2	4	3	3	3	1	3	1	2	1	1	2	1	2	1	2	3	0	1	2	1	2	2	2	4	1	1	0
	6	6	6	6	6	6	6	6	6	6	6	6	2	1	2	3	1	2	2	2	2	3	2	1	3	1	1	1	3	2	1	1	1	1	2	1	0	1	1	2	3	1	2	2	2	1	1	2	2
	4	6	7	7	4	5	6	6	5	4	4	4	1	1	2	2	2	2	2	2	2	2	3	2	3	1	1	2	1	2	0	0	0	0	0	0	0	0	0	0	0	0	0	0	0	0	0	0	0
	6	6	6	6	6	6	6	6	6	6	6	6	2	2	3	2	2	2	2	2	2	2	1	1	2	1	1	2	1	1	0	0	0	0	1	0	0	0	0	0	0	0	0	0	0	0	0	0	0
	2	5	6	6	6	6	3	5	5	5	5	5	2	3	3	3	1	3	3	1	1	1	2	1	1	1	1	1	1	1	3	3	3	3	2	3	3	3	2	1	1	0	1	1	2	1	3	1	0
	6	6	6	6	6	6	6	6	6	6	6	6	2	2	3	2	3	3	3	3	3	3	1	1	1	1	1	4	1	1	1	1	0	0	0	0	0	0	0	0	0	0	0	0	0	0	0	0	0
	4	6	6	6	6	6	2	6	6	6	6	6	2	2	2	2	1	2	2	2	1	1	2	1	2	1	1	2	1	2	0	0	1	0	0	0	0	0	0	0	0	0	0	0	0	0	0	0	0
	7	7	6	7	7	7	5	5	7	7	7	7	3	3	2	2	2	2	2	1	2	2	3	2	3	2	2	2	3	2	1	1	1	1	1	1	1	1	0	0	1	2	1	1	1	0	3	1	0
	4	5	5	5	5	4	4	4	4	4	4	4	1	3	2	1	1	2	1	1	1	2	2	2	1	2	2	1	1	2	0	0	0	0	1	0	0	0	0	0	0	0	0	0	0	0	0	0	0
	6	6	7	7	7	6	6	5	7	6	6	6	2	2	1	3	2	2	3	1	1	3	1	2	1	2	1	1	1	1	0	1	0	1	0	2	1	1	0	0	1	0	2	0	1	0	0	0	0
	6	6	7	7	7	6	6	5	7	6	6	6	2	2	1	3	2	2	3	1	1	3	1	2	1	2	1	1	1	1	0	1	0	1	0	2	1	1	0	0	1	0	2	0	1	0	0	0	0
	6	6	6	6	7	7	7	4	7	7	4	7	3	3	3	3	3	2	2	3	3	3	3	1	2	1	1	2	1	1	1	1	1	1	1	0	0	0	0	1	1	0	1	2	1	1	0	1	1
	6	7	7	7	7	6	7	7	6	7	7	7	2	3	2	2	2	2	2	0	1	3	2	1	2	1	1	1	1	1	1	0	1	1	1	0	0	0	0	0	0	0	0	0	0	0	0	0	0
	2	2	4	4	4	4	2	4	5	4	5	5	1	2	1	1	1	2	2	1	1	2	4	4	2	4	4	2	4	4	1	1	1	1	0	1	0	1	0	2	2	3	2	3	3	3	3	2	1
	5	5	7	7	4	4	4	3	6	4	5	6	2	2	2	2	1	2	1	1	2	2	4	3	3	3	2	2	3	2	1	1	0	1	1	0	1	1	0	2	0	0	1	2	1	0	1	0	0
	5	5	7	7	4	4	4	3	6	4	5	6	2	2	2	2	1	2	1	1	2	2	4	3	3	3	2	2	3	2	1	1	0	1	1	0	1	1	0	2	0	0	1	2	1	0	1	0	0
	4	4	5	6	6	6	6	6	5	5	5	6	2	2	2	2	2	2	2	1	2	2	3	3	3	3	3	2	3	2	1	1	1	1	1	1	1	1	1	1	1	0	1	2	2	2	1	2	1
	4	4	4	4	4	4	4	4	4	4	4	4	1	1	2	1	2	1	1	2	2	2	1	1	1	1	1	1	1	1	0	0	1	0	0	0	0	0	0	2	0	0	1	1	0	0	0	0	0
	4	4	4	4	4	4	4	4	4	4	4	4	1	1	2	1	2	1	1	2	2	2	1	1	1	1	1	1	1	1	0	0	1	0	0	0	0	0	0	2	0	0	1	1	0	0	0	0	0
	3	2	6	6	2	2	5	6	2	2	6	2	2	2	1	2	1	2	2	1	2	2	1	1	4	1	1	4	1	4	0	0	0	0	0	0	0	0	0	0	0	0	0	0	0	0	0	0	0
	6	6	6	6	6	6	6	4	6	6	4	6	3	3	1	2	1	2	1	2	1	1	1	2	1	1	1	1	3	2	3	3	3	3	3	3	3	3	3	3	1	2	2	2	2	3	2	2	1
	4	4	7	7	5	5	4	5	4	5	6	4	2	3	1	3	0	1	1	1	1	1	2	3	2	2	1	2	2	1	2	2	3	1	1	2	1	2	1	4	3	3	3	4	3	4	1	3	3
	6	6	7	5	6	6	6	4	6	6	6	6	3	3	1	2	2	2	2	0	1	2	3	2	2	2	1	1	3	2	1	1	0	1	0	1	0	0	0	0	0	0	0	1	0	1	0	0	0
	7	7	7	7	7	7	7	7	7	7	7	7	2	2	2	2	1	2	2	2	1	1	1	1	3	2	2	2	1	1	1	1	0	2	0	1	0	0	2	1	1	2	0	2	2	2	2	2	1
	2	2	2	2	2	2	2	2	2	2	2	2	0	0	3	0	3	0	1	1	1	1	1	1	3	2	2	3	3	3	2	1	2	2	1	3	1	1	1	0	0	0	0	1	1	2	2	2	0
	6	6	6	6	6	6	6	4	6	6	4	6	3	3	1	2	1	2	1	2	1	1	1	2	1	1	1	1	3	2	3	3	3	3	3	3	3	3	3	3	1	2	2	2	2	3	2	2	1
	1	1	1	1	1	1	1	1	1	1	1	1	0	0	3	0	3	0	0	3	3	3	1	1	4	1	1	4	1	1	0	0	0	0	0	0	0	0	0	0	0	0	0	0	0	0	0	0	0
	6	6	6	6	6	5	4	5	6	4	4	5	2	2	2	2	2	2	2	1	1	3	1	2	1	2	2	2	2	2	1	1	1	0	1	1	1	1	0	2	2	3	1	2	2	2	3	2	2
	6	6	6	6	6	5	4	5	6	4	4	5	2	2	2	2	2	2	2	1	1	3	1	2	1	2	2	2	2	2	1	1	1	0	1	1	1	1	0	2	2	3	1	2	2	2	3	2	2
	7	7	6	6	7	7	7	7	7	7	7	7	2	2	3	2	3	2	2	2	2	3	1	3	1	2	1	1	1	1	0	0	0	0	0	0	0	0	0	0	0	0	0	0	0	0	0	0	0
	5	6	6	6	6	6	2	6	6	6	6	6	2	2	2	2	1	2	2	1	2	2	2	1	1	1	1	2	1	2	1	0	0	1	1	0	1	0	0	0	0	0	0	0	0	0	0	0	0
	1	1	1	1	1	1	1	1	1	1	1	1	1	2	1	2	0	3	0	0	0	1	4	3	1	1	2	3	1	4	0	0	1	1	0	1	1	0	0	0	0	2	0	2	2	2	2	3	2
	1	1	1	1	1	4	4	1	1	4	1	3	0	0	2	2	1	2	1	2	1	3	3	1	3	1	1	3	1	2	1	0	1	1	1	0	0	0	0	0	2	0	0	2	0	4	1	0	0
	6	6	6	6	6	6	6	6	6	6	6	6	2	2	2	2	2	2	2	2	2	2	3	4	1	2	2	1	3	2	0	0	1	1	1	1	1	2	0	0	0	0	0	1	0	0	0	0	0
	2	2	4	6	7	6	6	6	6	6	6	6	2	2	2	2	0	2	2	2	1	2	3	1	3	1	3	3	2	1	1	0	1	0	0	0	1	0	0	1	2	1	1	2	1	1	0	0	0
	4	4	6	6	6	6	4	6	6	4	6	2	1	1	1	1	0	2	1	0	0	1	4	3	3	3	3	2	4	3	1	2	2	0	1	1	1	3	1	3	0	0	0	2	3	3	2	0	3
	3	1	7	7	4	4	3	7	3	4	7	4	3	2	2	2	2	2	2	1	2	3	1	1	1	1	1	1	1	1	0	0	0	0	0	0	0	0	0	0	0	0	0	0	0	0	0	0	0
	3	1	7	7	4	4	3	7	3	4	7	4	3	2	2	2	2	2	2	1	2	3	1	1	1	1	1	1	1	1	0	0	0	0	0	0	0	0	0	0	0	0	0	0	0	0	0	0	0
	6	4	7	7	6	7	7	7	2	4	7	2	3	3	2	3	2	2	2	2	3	3	1	2	1	1	1	1	1	1	0	0	0	0	0	0	0	0	0	0	1	0	0	0	0	1	0	0	0
	6	6	6	6	6	6	6	6	6	6	6	6	1	1	2	1	2	1	1	2	2	2	2	2	3	2	2	3	2	2	1	1	1	1	1	0	0	0	0	0	0	0	0	0	0	0	0	0	0
	1	1	6	6	5	5	3	6	6	6	6	6	3	3	0	2	1	3	3	0	1	1	3	3	1	1	3	3	3	2	0	1	1	0	1	1	1	1	0	0	0	0	0	1	0	0	0	2	0
	7	7	7	7	7	7	7	7	7	7	7	7	3	3	3	3	3	3	3	3	3	3	1	1	2	1	1	1	1	1	1	1	1	1	1	0	0	1	0	0	0	0	0	1	1	1	0	1	1
	7	7	7	7	7	7	7	7	6	7	7	7	3	3	1	2	1	1	1	2	1	3	3	1	3	1	2	1	1	2	1	2	1	2	3	2	3	1	1	2	1	0	1	3	2	1	3	1	2
	7	7	7	7	7	7	7	7	6	7	7	7	3	3	1	2	1	1	1	2	1	3	3	1	3	1	2	1	1	2	1	2	1	2	3	2	3	1	1	3	2	1	2	4	3	2	4	2	3
	2	2	4	4	4	4	2	4	5	4	5	5	1	2	1	2	1	2	2	1	1	2	4	4	2	4	4	2	4	4	1	1	1	1	0	1	0	1	0	2	2	3	2	3	3	3	3	2	1
	7	1	1	1	6	7	7	1	7	7	1	7	1	2	1	2	2	1	2	1	2	2	1	1	1	3	1	1	1	4	1	0	3	0	0	1	0	0	0	0	0	0	0	0	0	0	0	0	0
	4	5	3	4	4	3	3	3	5	5	4	5	2	2	1	2	1	2	1	1	1	1	4	4	3	3	3	3	3	3	3	3	3	3	3	3	3	3	1	2	2	1	2	3	3	3	1	3	1
	7	7	7	7	7	7	7	4	7	7	7	6	3	3	3	3	3	3	3	2	3	3	1	1	2	1	1	1	2	1	1	1	1	1	1	0	1	1	0	1	0	0	0	0	0	0	2	0	0
	4	4	7	7	4	4	3	2	4	4	2	2	3	3	2	3	2	3	2	0	0	3	4	4	2	2	2	3	3	3	1	1	3	1	3	2	2	2	1	2	2	2	1	3	3	1	3	2	4
	4	4	7	7	4	4	3	2	4	4	2	2	3	3	1	3	1	3	2	0	0	3	4	4	2	2	2	3	3	3	1	1	3	1	3	2	2	2	1	2	2	2	1	3	3	1	3	2	4
	5	6	7	6	6	6	7	6	6	6	6	6	2	2	2	3	3	3	2	3	3	3	1	1	2	2	2	1	3	1	1	2	1	1	1	1	1	1	1	2	2	1	2	2	2	2	2	3	2
	6	6	6	6	6	6	6	6	6	6	6	6	2	2	2	2	2	2	2	2	2	2	1	1	1	1	1	1	1	1	1	0	0	0	0	0	0	0	0	0	0	0	0	0	0	0	0	0	0
	6	6	6	6	6	6	6	6	6	6	6	6	2	2	2	2	2	2	2	2	2	2	1	1	1	1	1	1	1	1	1	0	0	0	0	0	0	0	0	0	0	0	0	0	0	0	0	0	0
	6	6	6	6	6	6	6	6	6	6	6	6	2	2	2	2	2	2	2	1	2	2	3	3	1	1	3	2	1	1	1	0	0	0	0	2	0	0	0	0	0	0	0	2	2	0	2	2	0
	6	7	7	7	7	7	7	7	7	7	7	7	2	2	2	2	2	2	2	0	1	2	2	1	1	1	1	1	2	1	1	1	1	1	1	1	1	1	0	1	1	1	1	1	1	1	1	1	1
	7	7	7	7	7	7	7	4	7	7	7	7	3	3	2	3	3	3	3	3	3	3	1	2	3	1	1	1	1	1	1	0	0	1	0	0	0	0	0	0	0	0	0	0	0	0	0	0	0
	6	6	6	6	6	6	6	6	6	6	6	6	2	2	2	2	2	2	2	1	1	2	1	1	1	1	1	1	2	2	1	1	1	1	1	1	1	1	0	0	0	0	0	0	0	0	0	0	0
	6	6	6	6	6	6	6	6	6	6	6	6	2	2	2	2	2	2	2	1	1	2	1	1	1	1	1	1	2	2	1	1	1	1	1	1	1	1	0	0	0	0	0	0	0	0	0	0	0
	7	7	7	7	7	7	7	7	7	7	7	7	2	2	3	2	3	2	2	3	3	3	1	1	1	1	1	1	1	1	1	0	2	1	1	0	0	1	0	0	0	0	0	0	0	0	0	0	0
	7	7	7	7	7	7	7	7	7	7	7	7	2	3	3	2	3	3	2	2	1	3	1	1	2	1	1	1	3	1	1	1	1	1	1	1	0	1	0	0	0	0	0	0	0	0	0	0	0
	6	6	5	4	6	6	6	6	6	6	6	6	2	2	2	2	2	2	2	1	2	2	2	2	1	1	1	1	2	2	1	0	0	1	0	1	0	0	0	1	0	0	0	1	1	0	0	0	0
	7	7	7	7	7	7	7	7	7	7	7	7	3	3	1	3	0	3	3	0	2	2	3	3	1	2	3	2	2	3	1	0	0	1	1	0	0	0	0	0	0	0	0	0	0	0	0	0	0
	7	7	7	7	7	7	7	7	7	7	7	7	3	3	3	3	0	3	3	3	3	3	1	1	1	1	1	1	1	1	0	0	3	0	0	0	0	0	0	0	0	0	0	0	0	0	0	0	0
	7	7	7	7	7	7	7	7	7	7	7	7	3	3	3	3	0	3	3	3	3	3	1	1	1	1	1	1	1	1	0	0	3	0	0	0	0	0	0	0	0	0	0	0	0	0	0	0	0
	6	6	6	6	6	6	6	2	5	5	3	2	0	2	2	3	2	2	0	3	0	3	1	2	1	3	1	2	3	4	3	3	2	3	1	2	3	3	2	2	2	0	1	2	2	3	0	1	1
	7	7	7	7	7	7	7	7	7	7	7	7	2	2	3	2	3	2	2	3	3	3	1	1	1	1	1	1	1	1	1	0	2	1	1	0	0	1	0	0	0	0	0	0	0	0	0	0	0
	7	7	7	7	7	7	7	7	7	7	7	7	3	3	2	2	0	3	3	2	2	2	1	1	3	1	1	1	1	1	0	0	0	1	0	0	0	0	0	0	0	0	0	0	0	0	0	0	0
	7	7	7	7	7	7	7	7	7	7	7	7	3	3	2	2	0	3	3	2	2	2	1	1	3	1	1	1	1	1	0	0	0	1	0	0	0	0	0	0	0	0	0	0	0	0	0	0	0
	6	6	7	5	6	6	6	4	6	6	7	6	2	2	2	3	2	2	2	2	2	2	1	2	2	2	1	1	2	2	1	1	1	1	1	0	1	0	0	0	1	1	1	2	2	1	1	1	1
	6	6	7	5	6	6	6	4	6	6	6	6	3	3	2	2	3	2	2	3	3	3	3	2	2	1	1	1	2	2	0	0	0	1	1	0	2	0	0	1	1	0	1	1	1	0	1	1	1
	7	7	7	7	7	7	7	7	7	7	7	7	2	3	3	2	3	3	2	2	1	3	1	1	2	1	1	1	3	1	1	1	1	1	1	1	0	1	0	0	0	0	0	0	0	0	0	0	0
	7	7	7	7	7	7	7	7	7	7	7	7	2	2	3	3	3	2	2	3	3	3	1	1	1	1	1	1	1	1	1	1	0	1	0	0	0	0	0	0	0	0	1	1	1	0	0	1	1
	7	7	7	7	7	7	7	7	7	7	7	7	2	2	3	3	3	2	2	3	3	3	1	1	1	1	1	1	1	1	1	1	0	1	0	0	0	0	0	0	0	0	1	1	1	0	0	1	1
	5	5	6	6	5	5	4	5	6	5	5	5	3	3	2	3	2	2	2	2	2	2	3	2	1	2	2	2	2	2	1	1	1	1	1	0	0	0	0	0	0	0	0	0	0	0	0	0	0
	3	5	6	6	3	3	2	5	5	5	3	3	2	2	2	2	2	2	2	2	1	3	3	2	2	1	2	1	2	2	0	0	0	0	1	0	0	0	0	1	0	1	3	1	1	0	0	0	0
	4	6	6	6	4	4	4	4	5	5	6	4	2	2	2	2	2	2	2	2	2	2	2	2	3	3	3	2	2	2	1	2	1	1	1	0	0	2	0	2	2	0	2	1	1	2	1	2	2
	6	6	6	6	6	6	6	6	6	6	6	6	3	3	2	3	3	3	3	0	3	3	1	1	1	1	3	1	1	1	0	0	0	0	0	0	0	0	0	0	0	0	0	0	0	0	0	0	0
	4	4	4	4	6	6	6	5	5	4	4	5	2	2	2	2	2	2	2	2	2	3	1	1	1	1	2	1	2	1	1	1	1	1	1	1	0	1	1	1	0	0	1	0	0	0	0	0	0
	7	7	7	7	7	7	6	6	5	6	7	5	3	3	2	3	2	2	2	2	2	2	2	2	2	2	2	1	3	3	2	1	1	1	0	1	1	1	1	1	3	0	1	1	1	1	0	1	1
	4	3	7	7	3	3	3	7	4	5	4	3	1	1	1	2	1	1	1	1	1	2	4	3	3	3	1	3	1	2	1	1	2	1	2	1	2	3	0	1	2	1	2	2	2	4	1	1	0
	2	2	6	4	3	4	4	6	6	4	6	3	3	3	2	3	3	2	1	2	3	3	1	1	1	1	1	1	1	1	0	0	0	0	0	0	0	0	0	0	0	0	0	0	0	0	0	0	0
	4	5	4	4	3	3	3	1	4	3	2	2	3	3	3	3	3	3	3	3	3	3	3	3	2	1	1	3	1	2	0	0	1	0	0	0	0	0	0	0	0	0	0	0	0	0	0	0	0
	6	6	6	6	6	6	6	6	6	6	6	6	1	1	2	1	2	1	1	2	2	2	2	2	3	2	2	3	2	2	1	1	1	1	1	0	0	0	0	0	0	0	0	0	0	0	0	0	0
	1	1	1	1	1	1	1	1	1	1	1	1	0	0	3	0	3	0	0	3	3	3	1	1	4	1	1	4	1	1	0	0	0	0	0	0	0	0	0	0	0	0	0	0	0	0	0	0	0
	1	1	1	1	1	1	1	1	1	1	1	1	0	0	3	3	3	3	3	3	3	3	4	4	1	4	4	4	1	4	0	1	1	0	0	0	0	1	0	2	0	0	0	2	0	0	0	3	0
	6	6	6	6	6	6	6	6	6	6	6	6	2	2	1	2	1	2	2	1	2	2	1	2	1	2	2	1	2	2	0	0	3	0	3	0	0	0	0	0	0	0	0	0	0	0	0	0	0
	2	2	7	7	2	2	2	2	2	2	7	2	0	1	3	3	0	2	2	0	3	3	1	1	1	1	1	1	1	1	0	0	0	0	0	0	0	0	0	0	0	0	0	0	0	0	0	0	0
	6	6	6	6	6	6	6	2	5	5	3	2	0	2	2	3	2	2	0	3	0	3	1	2	1	3	1	2	3	4	3	3	2	3	1	2	3	3	2	2	2	0	1	2	2	3	0	1	1
	2	2	6	6	2	2	2	6	2	2	6	2	3	3	3	3	3	3	3	2	3	3	1	1	3	1	1	3	1	1	0	0	0	0	0	0	0	0	0	0	0	0	0	0	0	0	0	0	0
	6	6	6	6	6	6	6	6	6	6	6	6	2	1	2	3	1	2	2	2	2	3	2	1	3	1	1	1	3	2	1	1	1	1	2	1	0	1	1	2	3	1	2	2	2	1	1	2	2
	6	6	7	7	7	7	6	5	7	6	6	6	3	2	2	2	2	2	2	2	3	3	1	1	1	1	1	1	2	1	1	0	1	1	0	0	0	0	0	0	0	0	0	1	1	0	2	0	1
	4	6	7	7	7	4	7	7	7	7	6	6	0	2	3	2	2	3	3	3	2	2	1	1	4	1	1	1	1	1	0	0	0	0	0	0	0	0	0	0	0	0	0	0	0	0	0	0	0
	4	2	6	6	6	6	4	7	3	5	7	2	2	3	2	2	1	2	2	2	1	2	3	1	4	2	3	2	4	2	3	2	3	2	1	0	1	1	0	1	1	2	2	1	2	2	1	2	1
	4	4	4	4	7	4	7	4	7	7	7	7	3	3	3	2	1	2	2	2	1	3	1	1	1	1	1	2	1	1	0	0	0	0	0	0	0	0	0	0	0	0	0	0	0	0	0	0	0
	6	4	6	6	6	4	4	4	4	6	4	4	2	2	2	2	2	2	2	2	1	2	3	2	2	2	2	2	1	3	1	0	2	1	1	0	1	1	0	1	1	2	0	2	1	1	1	0	0
	4	4	7	7	7	7	7	4	7	7	6	6	2	2	2	2	3	2	2	3	2	3	3	1	1	1	1	1	2	2	1	0	0	0	1	0	0	0	0	0	0	1	0	1	0	0	1	0	0
	2	5	6	6	6	6	6	6	6	6	6	6	2	2	2	2	2	2	2	2	2	2	1	1	1	1	3	1	3	3	1	1	1	1	0	0	0	1	0	0	0	0	0	0	0	0	0	0	0
	4	4	6	6	4	4	4	6	5	4	6	4	2	2	3	2	3	2	2	2	2	3	3	3	2	2	2	3	2	2	1	1	2	1	2	0	1	1	0	2	1	3	3	1	2	1	1	2	0
	2	1	4	5	6	6	3	4	3	4	4	5	1	2	2	2	1	1	2	1	2	2	2	3	3	1	2	1	3	2	0	0	1	1	0	1	2	1	0	0	1	0	2	2	1	0	2	1	0
	4	4	4	4	4	4	4	3	3	3	3	3	2	2	2	2	3	2	3	2	3	3	4	3	2	3	3	2	3	3	1	0	1	1	1	0	1	1	0	0	0	0	1	1	1	0	1	1	1
	2	2	7	6	3	2	6	2	4	3	6	4	2	2	2	2	1	2	2	2	3	3	3	3	3	2	2	2	2	2	1	0	2	1	0	0	0	0	0	0	1	1	1	1	0	1	2	1	0
	6	5	7	7	5	5	3	7	5	5	6	6	1	2	3	1	3	1	1	2	1	2	1	1	2	2	1	2	2	2	3	1	3	3	1	0	3	2	0	0	0	0	0	2	0	1	0	0	0
	6	5	7	7	5	5	3	7	5	5	6	6	1	2	3	1	3	1	1	2	1	2	1	1	2	2	1	2	2	2	3	1	3	3	1	0	3	2	0	0	0	0	0	2	0	1	0	0	0
	4	4	6	6	4	4	5	4	4	4	5	5	3	2	2	2	2	2	2	1	1	2	2	2	2	2	2	3	3	2	1	2	2	2	1	2	1	2	2	2	2	2	2	2	2	2	2	2	3
	6	6	7	7	7	7	6	5	7	6	6	6	3	2	2	2	2	2	2	2	3	3	1	1	1	1	1	1	2	1	1	0	1	1	0	0	0	0	0	0	0	0	0	1	1	0	2	0	1
	6	6	6	6	6	7	6	6	6	5	6	6	0	0	3	0	3	0	0	3	3	3	2	2	3	2	2	3	2	2	1	1	1	1	1	1	1	1	0	0	0	0	0	0	0	0	0	2	0
	2	2	7	7	2	2	2	2	2	2	7	2	0	1	3	3	0	2	2	0	3	3	1	1	1	1	1	1	1	1	0	0	0	0	0	0	0	0	0	0	0	0	0	0	0	0	0	0	0
	6	6	4	4	6	6	6	6	6	5	4	6	2	2	2	2	2	2	2	2	1	2	1	3	2	3	3	1	3	2	1	1	1	1	1	1	1	1	1	2	2	4	4	4	4	2	4	2	0
	2	2	7	7	2	2	2	7	7	2	7	4	3	3	3	3	3	3	3	3	3	3	4	1	3	1	1	3	1	2	0	0	0	0	0	0	0	0	0	0	0	0	0	0	0	0	0	0	0
	1	1	1	1	1	1	1	7	7	7	7	7	3	3	3	3	0	3	3	0	3	3	1	1	1	1	1	1	1	1	0	0	0	0	0	0	0	0	0	0	0	0	0	0	0	0	0	0	0
	5	6	7	7	6	6	5	5	6	6	6	6	2	2	2	2	2	2	2	3	3	3	1	2	1	1	2	1	3	2	1	1	1	1	0	0	0	0	0	1	0	0	0	1	0	0	2	1	0
	5	5	5	5	5	5	5	5	5	5	5	5	2	2	2	2	1	2	2	1	2	3	1	1	2	1	1	1	1	4	1	2	1	2	2	2	2	1	2	1	2	3	2	1	3	3	2	3	2
	5	5	5	5	5	5	5	5	5	5	5	5	2	2	2	2	1	2	2	1	2	3	1	1	2	1	1	1	1	4	1	2	1	2	2	2	2	1	2	1	2	3	2	1	2	3	2	3	2
	4	4	4	4	4	4	4	3	3	3	3	3	2	2	2	2	3	2	3	2	3	3	4	3	2	3	3	2	3	3	1	0	1	1	1	0	1	1	0	0	0	0	1	1	1	0	1	1	1
	6	6	4	4	6	7	6	4	6	6	4	6	3	2	2	3	3	3	3	1	2	3	2	2	2	2	3	2	3	2	0	1	1	1	1	0	1	0	1	1	0	2	2	2	1	1	1	1	0
	5	5	7	5	5	6	5	3	6	6	6	5	3	3	2	3	2	2	2	1	3	3	2	2	2	1	2	1	2	1	2	1	1	1	1	0	0	0	0	2	0	0	0	1	0	1	1	0	0
	5	5	5	5	5	5	5	5	5	5	5	5	2	2	2	2	2	2	2	2	2	2	2	2	2	2	2	1	2	2	0	0	0	0	0	0	0	0	0	0	0	0	0	0	0	0	0	0	0
	7	6	6	6	7	6	6	6	4	6	6	6	2	2	2	2	1	2	1	1	1	1	1	2	2	1	1	2	2	1	2	1	0	1	0	1	3	1	0	2	1	2	0	2	1	2	0	2	0
	6	6	6	6	6	6	6	6	6	6	6	6	1	1	1	1	1	1	1	1	1	1	1	1	4	1	1	1	4	2	1	1	1	1	1	1	1	1	1	0	0	0	1	4	2	4	4	0	0
	6	6	6	6	6	6	6	6	6	6	6	6	2	3	2	2	0	3	2	2	3	3	1	1	3	1	1	1	1	1	0	0	0	0	0	0	2	0	0	0	0	0	0	0	0	0	0	0	0
	5	6	7	7	5	5	5	7	6	5	7	4	2	1	1	1	1	2	2	1	3	1	2	3	2	4	3	1	3	2	1	1	1	1	1	2	1	0	2	2	0	3	4	2	2	4	2	2	3
	1	1	7	7	2	2	1	7	2	2	7	2	2	1	1	1	1	2	2	1	2	2	1	2	4	1	1	4	2	1	1	0	0	0	1	0	1	0	0	0	0	0	0	0	0	0	0	0	0
	7	7	7	7	7	7	7	7	7	7	7	7	2	2	2	2	1	2	2	2	2	2	1	1	1	1	1	1	1	1	0	0	1	0	0	0	1	0	0	0	0	0	0	0	0	0	0	0	0
	4	5	6	5	6	6	6	6	6	5	5	5	2	1	1	1	1	2	1	1	3	3	3	4	2	4	4	2	2	2	0	0	1	1	0	1	1	0	0	1	0	0	1	2	0	1	1	1	0
	6	6	6	5	6	6	6	5	6	6	5	6	3	2	3	2	3	3	2	2	2	3	2	2	2	2	2	1	2	2	0	0	1	1	0	0	1	0	0	1	0	0	0	0	0	0	1	0	0
	6	6	6	6	6	6	6	6	6	6	6	6	2	2	2	2	1	1	1	2	1	2	3	2	1	1	1	3	2	3	1	1	1	1	1	1	1	0	0	1	1	0	0	0	1	1	1	1	0
	6	6	6	6	6	6	6	6	6	6	6	6	2	2	2	2	1	1	1	2	1	2	3	2	1	1	3	3	2	3	1	1	1	1	1	1	1	0	0	1	1	0	0	0	1	1	1	1	0
	7	7	7	6	7	7	7	5	7	7	6	6	2	2	2	2	2	2	1	2	2	2	2	1	1	2	1	1	1	1	1	1	0	0	0	0	1	1	0	0	0	0	0	0	0	0	0	0	0
	7	7	7	7	7	7	7	7	7	7	7	7	3	3	2	2	2	2	2	1	2	3	1	1	1	1	1	1	1	1	1	0	1	0	0	0	0	0	0	0	0	0	0	0	0	0	0	0	0
	4	4	4	4	4	4	4	4	4	4	4	4	2	2	1	2	1	2	2	1	1	1	1	1	4	1	1	4	1	1	0	0	0	0	0	0	0	0	0	0	0	0	0	0	0	0	0	0	0
	6	6	6	4	6	6	6	4	6	6	4	4	2	2	2	2	2	2	2	2	2	2	3	1	1	1	1	1	1	1	2	2	2	2	2	0	1	2	1	3	2	3	1	1	1	1	1	1	2
	6	6	6	4	6	6	6	4	6	6	4	4	2	2	2	2	2	2	2	2	2	2	3	1	1	1	1	1	1	1	2	2	2	2	2	0	1	2	1	3	2	3	1	1	1	1	1	1	2
	5	5	7	7	5	5	5	5	6	5	6	5	2	2	2	2	2	2	2	1	1	2	2	3	3	3	3	3	3	3	1	1	1	1	1	1	1	1	1	1	1	0	0	1	1	1	1	1	1
	6	7	7	7	6	6	5	6	7	6	6	4	2	2	2	1	2	1	1	3	0	3	4	4	1	2	2	2	1	3	1	1	1	1	1	2	2	0	0	1	0	0	1	4	2	3	3	1	0
	6	7	7	7	6	6	5	6	7	6	6	4	2	2	1	1	2	1	1	3	0	3	4	4	1	2	2	2	1	3	1	1	1	1	1	2	2	0	0	1	0	0	1	4	2	3	3	1	0
	6	6	6	6	6	6	7	7	7	7	7	7	2	2	3	2	3	2	2	1	3	3	2	1	2	1	1	2	1	1	0	0	0	0	0	0	1	0	0	0	0	0	1	0	0	0	0	0	0
	4	6	6	6	6	6	6	2	5	6	6	2	1	2	1	0	1	1	1	1	1	1	4	3	3	3	4	2	4	2	2	3	2	2	1	1	2	2	1	2	2	3	2	3	3	3	2	2	2
	6	6	6	6	6	6	7	7	7	7	7	7	2	2	3	2	3	2	2	1	3	3	2	1	2	1	1	2	1	1	0	0	0	0	0	0	1	0	0	0	0	0	1	0	0	0	0	0	0
	4	6	6	6	6	6	6	2	5	6	6	6	1	2	1	0	1	1	1	1	1	1	4	3	3	3	4	2	4	2	2	3	2	2	1	1	2	2	1	2	2	3	2	3	3	3	2	2	2
	7	7	7	7	7	7	7	7	7	7	7	7	2	2	3	2	1	2	2	1	3	3	1	1	2	1	1	1	1	1	0	0	0	0	0	0	0	0	0	0	0	0	0	0	0	0	0	0	0
	7	7	7	7	7	7	7	7	7	7	7	7	2	1	1	2	1	1	2	1	2	3	2	2	1	1	4	4	1	4	3	3	3	2	3	3	3	2	3	3	3	2	2	3	2	3	2	3	2
	7	7	6	7	7	7	6	2	7	7	7	7	2	2	3	2	2	2	2	2	2	3	2	1	2	1	2	2	2	1	1	0	0	1	1	0	0	0	0	0	1	0	0	1	1	0	0	0	1
	4	5	6	6	6	6	6	6	6	6	6	6	2	2	3	2	3	2	2	1	3	2	3	3	1	1	2	2	3	3	0	1	1	1	0	0	0	0	0	0	0	0	0	0	1	1	0	1	1
	4	5	6	6	6	6	6	6	6	6	6	6	2	2	3	2	3	2	2	1	3	2	3	3	1	1	2	2	3	3	0	1	1	1	0	0	0	0	0	0	0	0	0	0	1	1	0	1	1
	6	6	6	6	6	6	6	6	6	6	6	6	2	2	2	2	2	2	2	1	2	2	3	3	2	3	3	2	3	3	1	1	1	1	1	1	1	1	1	1	1	1	1	1	1	1	1	1	1
	5	5	5	5	5	5	5	5	5	5	5	5	2	2	2	2	2	2	2	1	1	1	1	1	4	1	1	4	1	1	0	1	1	1	1	1	1	0	1	2	2	2	2	2	2	2	2	2	2
	6	6	6	6	5	4	5	6	6	4	6	3	2	2	1	2	1	2	2	1	1	1	3	3	3	2	2	3	3	3	1	1	1	2	1	2	2	0	1	0	1	0	1	1	1	1	1	1	1
	7	7	7	6	7	7	7	5	7	7	6	6	2	2	2	2	2	2	1	2	2	2	2	1	1	2	1	1	1	1	1	1	0	0	0	0	1	1	0	0	0	0	0	0	0	0	0	0	0
	7	7	7	6	7	7	7	5	7	7	6	6	2	2	2	2	2	2	1	2	2	2	2	1	1	2	1	1	1	1	1	1	0	0	0	0	1	1	0	0	0	0	0	0	0	0	0	0	0
	5	6	6	6	7	6	6	6	6	6	6	6	2	2	2	2	2	2	2	2	1	2	2	3	3	1	1	2	3	2	1	1	1	1	1	1	1	0	0	1	1	1	0	0	1	1	1	1	0
	5	6	6	6	7	6	6	6	6	6	6	6	2	2	2	2	2	2	2	2	1	2	2	3	3	1	1	2	3	2	1	1	1	1	1	1	1	0	0	1	1	1	0	0	1	1	1	1	0
	7	7	7	7	7	7	6	4	7	7	4	7	3	3	3	3	3	3	3	2	3	3	3	2	2	1	2	1	2	1	1	0	1	1	1	0	0	0	0	0	0	0	1	1	0	0	0	0	0
	6	6	6	6	6	6	6	6	6	6	6	6	2	2	2	2	1	2	2	2	2	2	3	2	2	2	2	2	2	2	1	1	1	1	1	1	1	1	0	1	1	1	1	1	1	1	2	1	1
	7	7	7	4	7	7	7	4	7	7	4	7	3	3	3	3	3	2	2	2	2	3	1	1	1	1	1	1	2	2	0	1	0	1	0	1	1	1	0	1	1	3	1	1	1	1	1	2	1
	3	3	6	6	3	3	2	7	2	2	7	2	3	3	3	3	3	3	2	3	3	3	1	1	1	1	1	1	1	1	1	0	1	0	0	0	0	0	0	0	0	0	0	0	0	0	0	0	0
	2	2	2	2	2	2	2	2	2	2	2	2	0	0	1	1	1	1	1	2	1	1	4	4	4	4	4	1	4	4	3	3	2	3	3	3	3	3	3	4	4	1	4	4	4	2	2	2	0
	6	7	7	6	6	5	3	4	6	6	6	6	2	2	2	2	2	1	2	1	1	2	3	4	3	3	3	2	3	3	1	2	2	2	1	1	1	1	1	2	2	2	2	2	2	2	1	1	2
	6	7	7	6	6	5	3	4	6	6	6	6	2	2	2	2	2	1	2	1	1	2	3	4	3	3	3	2	3	3	1	2	2	2	1	1	1	1	1	2	2	2	2	2	2	2	1	1	2
	7	7	7	7	7	7	7	7	7	7	7	7	3	1	0	0	0	2	1	2	2	3	1	3	3	2	4	3	1	2	0	0	0	1	1	0	0	0	1	2	0	1	2	1	4	0	0	1	2
	6	6	6	6	6	6	6	6	6	6	6	6	2	2	2	2	1	2	2	1	1	2	1	1	1	2	4	1	4	3	1	1	1	1	1	0	0	1	0	1	1	1	1	1	1	1	4	2	1
	4	4	6	6	4	4	4	4	4	4	4	4	2	2	2	2	2	1	2	3	3	3	3	3	2	3	2	1	2	3	1	1	1	1	1	1	1	1	1	1	1	1	1	1	1	1	1	1	1
	4	4	4	6	4	4	4	4	4	4	4	4	2	2	2	2	2	1	2	3	3	3	3	3	2	3	2	1	2	3	1	1	1	1	1	1	1	1	1	1	1	1	1	1	1	1	1	1	1
	6	6	6	6	6	6	6	6	6	6	6	6	2	2	1	2	1	2	1	2	2	3	1	1	4	1	1	4	1	2	1	1	1	1	2	1	1	1	0	0	2	1	0	3	0	1	2	1	1
	6	6	6	6	6	6	6	6	6	6	6	6	2	2	1	2	1	2	1	2	2	2	1	1	4	1	1	4	1	1	1	1	1	1	2	1	1	1	0	0	2	1	0	3	0	1	2	1	1
	7	7	7	7	7	7	6	4	7	7	4	7	3	3	3	3	3	3	3	2	3	3	3	2	2	1	2	1	2	1	1	0	1	1	1	0	0	0	0	0	0	0	1	1	0	0	0	0	0
	6	6	6	6	6	6	6	6	6	6	6	6	2	2	2	2	2	2	2	2	2	2	1	1	1	1	1	1	1	1	0	0	1	1	0	0	0	0	0	0	0	0	0	1	0	0	0	0	0
	3	4	4	4	3	2	2	4	4	5	2	2	2	2	2	2	2	2	2	1	2	2	1	2	4	1	3	3	1	2	1	1	0	1	1	0	0	0	0	0	0	0	0	2	0	2	1	0	1
	6	6	6	6	6	6	6	6	6	6	6	6	2	2	2	2	2	2	2	2	2	2	1	1	1	1	1	1	1	1	0	0	1	1	0	0	0	0	0	0	0	0	0	1	0	0	0	0	0
	6	6	6	6	6	6	6	6	6	6	6	6	2	2	3	2	3	3	2	0	3	3	1	1	2	2	3	1	1	2	0	0	1	1	0	0	1	0	0	0	0	0	0	0	0	0	0	0	0
	6	6	4	4	6	6	6	3	6	6	3	6	2	1	1	2	1	2	2	1	2	1	4	2	1	2	3	3	3	4	3	3	3	3	3	3	3	3	2	2	3	3	3	3	3	3	3	2	3
	4	6	6	7	7	7	7	4	7	7	7	7	2	1	2	1	1	2	1	2	2	2	2	3	4	1	4	4	2	2	0	2	2	0	0	0	0	0	0	4	2	3	3	2	1	0	2	0	2
	6	6	6	6	6	6	6	6	6	6	6	6	3	3	3	2	3	3	3	1	3	3	1	1	1	1	1	1	1	1	1	1	1	1	0	1	0	0	0	2	1	0	1	2	1	1	2	1	1
	5	4	5	5	4	4	4	5	5	4	5	4	2	2	2	2	1	2	2	2	2	2	3	2	3	2	2	2	3	3	1	1	1	1	1	1	1	1	0	1	1	0	1	1	1	1	2	2	1
	5	4	5	5	4	4	4	5	5	4	5	4	2	2	2	2	1	2	2	2	2	2	3	2	3	2	2	2	3	3	1	1	1	1	1	1	1	1	0	2	2	1	2	2	2	2	3	3	2
	5	4	5	4	5	5	6	6	6	6	6	6	3	3	3	3	3	3	3	3	3	3	1	1	1	1	1	1	1	1	0	0	0	0	0	0	0	0	0	0	0	0	0	0	0	0	0	0	0
	4	4	4	4	4	4	4	4	4	4	4	4	2	2	1	2	1	2	2	1	1	1	3	3	3	3	2	2	3	2	1	2	2	1	1	2	1	1	1	2	2	2	2	2	2	2	2	2	2
	6	6	7	7	6	6	5	7	5	6	7	5	3	3	3	2	3	3	3	1	3	3	3	3	2	1	3	2	2	1	0	0	0	1	0	0	0	0	0	1	1	1	1	1	1	1	1	1	1
	7	7	7	7	7	7	5	4	5	7	4	7	1	2	1	2	1	2	2	2	1	2	2	3	3	2	3	1	3	2	2	2	3	3	3	2	3	1	1	1	1	0	2	3	0	1	0	1	0
	7	7	7	7	7	7	5	4	5	7	4	7	1	2	1	2	1	2	1	1	2	2	2	3	3	2	3	1	3	2	2	2	3	3	3	2	3	1	1	0	0	0	2	3	0	1	0	1	0
	5	6	6	6	6	6	6	6	6	6	6	6	2	2	2	2	2	2	1	1	2	2	2	2	3	3	1	3	2	1	1	1	1	2	2	0	1	1	0	0	0	0	0	0	2	1	1	1	1
	6	6	6	6	6	6	6	6	6	6	4	6	2	2	2	2	2	2	2	2	2	2	2	2	2	2	2	1	3	2	1	3	1	2	2	0	0	1	0	0	0	0	0	0	0	0	0	0	0
	6	6	6	6	6	6	6	7	7	7	7	7	2	2	2	2	2	2	2	1	2	2	1	1	2	1	1	1	1	1	0	0	0	0	0	0	0	0	0	0	0	0	0	0	0	0	0	0	0
	6	6	6	6	6	6	6	6	6	6	6	6	3	3	3	3	3	3	2	3	3	3	4	1	1	3	2	1	1	4	1	1	0	1	1	0	0	0	0	1	1	1	1	2	1	1	1	1	1
	6	6	6	6	6	6	6	6	6	6	6	6	2	2	2	2	2	2	2	1	1	2	2	2	1	1	1	1	2	2	1	1	1	1	1	1	1	1	1	1	1	0	1	1	1	1	0	0	0
	4	6	6	4	4	6	6	4	6	6	6	4	2	2	2	2	2	2	2	1	1	2	3	2	2	1	1	2	1	1	0	0	0	0	0	1	0	0	0	0	0	0	0	0	0	0	0	0	0
	4	4	4	4	4	4	4	4	4	4	4	4	2	2	2	2	2	2	1	2	2	2	1	1	1	1	1	1	1	1	0	0	1	1	0	0	0	0	0	0	0	0	0	0	0	0	0	0	0
	2	2	2	2	2	2	2	2	2	2	2	2	0	0	1	1	1	1	1	2	1	1	4	4	4	4	4	1	4	4	3	3	2	3	3	3	3	3	3	4	4	1	4	4	4	2	2	2	0
	6	6	7	7	7	7	7	6	7	7	7	6	2	3	2	2	2	2	2	2	1	2	1	2	1	1	1	1	4	1	1	1	0	0	1	1	1	1	0	1	2	0	1	2	1	1	0	1	1
	5	5	7	7	5	5	5	7	5	4	7	5	2	2	3	2	2	3	2	2	3	3	1	1	1	1	1	1	1	1	1	0	0	1	0	0	1	0	0	0	0	0	0	0	0	0	0	0	0
	4	6	6	4	4	6	6	4	6	6	6	4	2	2	2	2	2	2	2	1	1	2	3	2	2	1	1	2	1	1	0	0	0	0	0	1	0	0	0	0	0	0	0	0	0	0	0	0	0
	5	6	7	7	6	6	6	6	6	6	6	6	1	1	2	2	1	2	2	2	2	2	2	2	1	1	3	1	3	2	1	0	0	0	0	0	0	1	0	0	0	0	0	1	1	1	0	1	0
	6	6	7	7	6	6	5	7	5	6	7	5	3	3	3	2	3	3	3	1	3	3	3	3	2	1	3	2	2	1	0	0	0	1	0	0	0	0	0	0	0	0	0	0	0	0	0	0	0
	7	7	7	5	6	7	6	4	7	7	4	7	1	1	1	2	1	1	1	2	2	1	3	2	3	3	2	2	3	2	1	1	1	2	1	1	0	1	1	3	4	4	4	4	4	4	4	4	0
	7	7	7	7	7	7	7	7	7	7	7	7	3	2	2	2	2	2	2	2	2	3	1	1	1	1	1	1	1	1	0	0	0	0	0	0	0	0	0	0	0	0	0	0	0	0	0	0	0
	6	6	6	6	6	6	6	4	6	6	4	6	2	2	2	2	2	2	2	1	2	2	2	2	2	2	2	1	3	2	1	0	0	1	0	0	1	1	0	1	0	2	0	1	0	0	1	1	0
	5	6	7	7	3	5	4	6	6	5	7	6	2	2	3	2	2	2	2	2	2	3	3	2	3	2	1	2	2	1	0	0	0	1	0	0	0	0	0	1	0	0	1	1	1	1	1	0	0
	6	6	6	6	6	6	6	6	6	6	6	6	2	2	2	2	2	2	2	1	2	2	2	2	2	1	1	1	2	1	1	0	2	2	1	0	1	1	0	1	1	0	1	2	0	0	1	0	1
	4	4	4	4	4	4	4	4	4	4	4	4	2	2	2	2	1	2	2	0	2	2	2	1	1	1	1	1	2	1	0	0	1	1	0	0	0	0	0	0	0	0	0	2	1	0	0	0	0
	7	6	7	7	7	7	6	6	6	6	6	6	2	2	3	2	2	2	2	2	3	3	1	1	1	1	1	1	2	1	1	0	1	1	0	0	0	1	0	0	0	0	0	0	0	0	0	0	0
	7	7	7	7	7	7	7	7	7	7	7	7	3	3	3	2	3	3	3	3	3	3	1	1	1	1	1	1	1	1	0	0	0	0	0	0	0	0	0	0	0	0	0	0	0	0	0	0	0
	7	7	7	7	7	7	7	7	7	7	7	7	3	3	3	2	3	3	3	3	3	3	1	1	1	1	1	1	1	1	0	0	0	0	0	0	0	0	0	0	0	0	0	0	0	0	0	0	0
	4	4	7	6	4	4	4	3	4	4	5	4	2	2	2	2	1	1	1	1	1	1	4	2	2	3	3	3	4	2	2	1	2	2	1	2	3	1	1	2	2	1	2	3	3	3	3	2	3
	5	6	5	4	5	5	5	4	5	5	5	3	2	2	2	2	1	2	2	2	1	2	3	2	3	2	2	2	2	2	1	1	1	2	1	1	2	2	2	2	1	1	1	2	2	1	1	1	2
	5	6	5	4	5	5	5	4	5	5	5	3	2	2	2	2	1	2	2	2	1	2	3	2	3	2	2	2	2	2	1	1	1	2	1	1	2	2	2	2	1	1	1	2	2	1	1	1	2
	6	6	6	6	6	6	6	6	6	6	6	6	2	2	2	2	2	2	2	1	2	2	3	2	1	2	2	1	2	2	1	0	1	1	1	0	0	1	0	0	0	0	0	1	1	0	1	0	0
	7	7	7	7	6	7	6	7	7	6	7	5	2	2	2	3	2	2	2	1	1	3	3	3	2	1	1	2	3	3	1	1	1	1	1	0	1	0	0	1	1	1	0	1	1	1	1	1	0
	7	7	7	6	7	7	7	6	7	7	6	7	3	3	2	2	2	2	2	1	1	3	1	1	2	2	2	1	1	1	1	2	2	1	2	1	1	1	1	2	2	2	2	3	2	2	3	2	1
	7	7	7	6	7	7	7	6	7	7	6	7	3	3	2	2	2	2	2	1	1	3	1	1	2	2	2	1	1	1	1	2	2	1	2	1	1	1	1	2	2	2	2	3	2	2	3	2	1
	6	6	6	6	6	6	6	6	6	6	6	6	2	2	2	2	2	2	2	2	2	2	2	2	3	2	2	1	3	1	1	1	0	1	1	0	1	0	0	0	0	0	0	0	1	1	1	0	1
	2	1	5	5	5	4	4	4	4	4	5	6	1	2	3	2	2	2	2	2	1	1	1	2	1	3	2	1	3	2	1	0	2	2	1	1	1	1	0	2	1	0	1	3	2	2	1	3	2
	5	5	5	5	5	5	5	5	5	5	5	5	2	2	2	2	2	2	2	2	2	2	2	2	2	2	2	1	2	2	0	0	0	0	0	0	0	0	0	0	0	0	0	0	0	0	0	0	0
	6	6	4	4	6	6	4	4	6	4	4	4	1	2	2	2	1	1	2	2	2	2	1	2	2	3	2	1	2	3	2	1	0	1	0	1	1	1	1	2	1	2	2	1	2	2	1	2	1
	7	7	7	7	7	7	7	7	7	7	7	7	2	2	2	2	2	2	2	1	2	3	3	1	1	1	1	1	1	1	1	1	1	1	1	0	1	1	0	0	0	0	0	0	0	0	0	0	0
	7	7	7	7	7	7	7	7	7	7	7	7	2	2	2	2	2	2	2	1	2	3	3	1	1	1	1	1	1	1	1	1	1	1	1	0	1	1	0	0	0	0	0	0	0	0	0	0	0
	6	6	4	4	6	6	4	4	6	4	4	4	1	2	2	2	1	1	2	2	2	2	1	2	2	3	2	1	2	3	2	1	0	1	0	1	1	1	1	2	1	2	2	1	2	2	1	2	1
	7	7	7	7	7	7	7	7	7	7	6	7	3	2	3	3	1	2	2	3	3	3	1	1	1	1	1	1	1	1	0	0	0	0	0	0	0	0	0	0	0	0	0	0	0	0	0	0	0
	7	7	7	7	7	7	7	7	7	7	7	4	2	2	2	2	1	2	2	2	2	2	1	1	1	1	1	1	1	1	0	0	1	0	0	0	1	0	0	0	0	0	0	0	0	0	0	0	0
	7	7	7	7	7	7	6	7	7	7	7	7	3	2	3	3	1	2	2	3	3	3	1	1	1	1	1	1	1	1	0	0	0	0	0	0	0	0	0	0	0	0	0	0	0	0	0	0	0
	6	7	7	7	6	6	5	6	6	6	7	5	2	2	2	2	2	2	2	2	2	2	1	1	2	1	1	1	2	2	0	0	1	1	1	0	0	0	0	1	0	0	0	1	0	0	0	0	0
	2	5	6	6	6	6	3	5	5	5	5	5	2	3	3	3	1	3	3	1	1	1	2	1	1	1	1	1	1	1	3	3	3	3	2	3	3	3	2	1	1	0	1	1	2	1	3	1	0
	6	6	7	5	6	6	5	4	5	5	6	6	2	3	3	2	3	3	3	1	2	3	3	2	1	1	1	1	3	1	1	0	1	1	1	0	1	0	0	0	0	0	0	0	0	0	0	0	0
	6	6	7	5	6	6	5	4	5	5	6	6	2	3	3	2	3	3	3	1	2	3	3	2	1	1	1	1	3	1	1	0	1	1	1	0	1	0	0	0	0	0	0	0	0	0	0	0	0
	4	5	6	5	5	5	4	5	5	5	5	5	2	2	1	3	1	2	1	2	1	2	3	3	3	3	1	3	3	2	1	1	1	1	0	0	1	1	0	0	1	0	2	2	1	1	0	0	1
	5	5	6	6	6	6	5	6	6	6	6	6	2	2	2	2	2	2	2	2	2	2	1	1	2	1	1	1	1	2	0	0	1	0	0	0	0	0	0	0	0	0	0	0	0	0	0	0	0
	4	6	6	4	2	2	2	1	6	6	4	4	2	2	2	2	1	2	1	1	1	2	4	4	2	2	3	2	2	2	1	1	1	1	0	0	0	1	0	1	3	2	3	2	1	1	2	1	1
	2	4	3	4	3	3	3	3	3	3	3	4	1	2	1	2	2	2	1	2	3	3	4	1	2	3	2	2	1	1	1	1	1	2	0	0	0	0	0	3	4	2	3	3	2	0	4	1	0
	1	3	3	3	3	2	3	4	4	4	3	4	2	2	2	2	1	2	2	2	2	2	1	2	2	2	2	2	2	2	1	1	1	1	1	0	1	1	1	1	1	2	2	2	2	1	2	1	1
	1	3	3	3	3	2	3	4	4	4	3	4	2	2	2	2	1	2	2	2	2	2	1	2	2	2	2	2	2	2	1	1	1	1	1	0	1	1	1	1	1	2	2	2	2	1	2	1	1
	6	6	6	6	6	6	6	6	6	6	6	6	2	2	2	2	2	2	2	1	2	2	2	2	1	2	1	1	3	2	0	0	0	0	0	0	0	0	0	1	1	1	1	1	1	1	1	1	1
	6	6	6	6	6	6	6	6	6	6	6	4	2	2	2	2	1	2	2	2	2	2	3	1	2	1	1	1	3	1	1	0	0	1	1	1	1	0	0	0	0	0	0	1	1	1	0	0	0
	6	6	6	6	6	6	6	6	6	6	6	4	2	2	2	2	1	2	2	2	2	2	3	1	2	1	1	1	3	1	1	0	0	1	1	1	1	0	0	0	0	0	0	1	1	1	0	0	0
	6	6	6	6	6	6	6	6	6	6	6	6	3	3	3	3	1	2	2	3	3	3	3	2	3	1	1	1	1	1	1	1	1	1	1	1	1	1	1	0	0	0	0	0	0	0	0	0	0
	4	4	4	4	4	4	4	4	4	4	4	4	2	2	2	2	1	2	2	1	2	2	3	2	2	1	1	1	1	1	3	0	3	2	1	0	0	1	0	0	0	0	0	0	0	0	0	0	0
	6	6	7	7	5	5	4	7	5	5	7	4	2	3	2	2	2	1	2	2	1	3	2	4	1	1	1	2	1	2	1	1	1	1	1	1	1	1	0	3	2	0	2	4	3	3	2	2	0
	6	6	7	7	5	5	4	7	5	5	7	4	2	3	2	2	2	1	2	2	1	3	2	4	1	1	1	2	1	2	1	1	1	1	1	1	1	1	0	3	2	0	2	4	3	3	2	2	0
	7	7	7	7	7	7	7	7	7	7	7	7	2	2	2	2	1	2	2	1	2	3	1	1	2	1	1	1	1	1	1	0	1	1	0	0	0	0	0	0	1	0	0	1	0	0	2	1	1
	3	2	6	6	2	2	5	6	2	2	6	2	2	2	1	2	1	2	2	1	2	2	1	1	4	1	1	4	1	4	0	0	0	0	0	0	0	0	0	0	0	0	0	0	0	0	0	0	0
	3	2	6	6	2	2	5	6	2	2	6	2	2	2	1	2	1	2	2	1	2	2	1	1	4	1	1	4	1	4	0	0	0	0	0	0	0	0	0	0	0	0	0	0	0	0	0	0	0
	7	7	7	7	7	7	7	7	7	7	7	7	3	3	3	3	3	3	3	3	3	3	1	1	2	1	1	1	1	1	0	0	1	1	0	0	0	0	0	2	2	0	4	2	3	0	0	4	0
	7	7	7	7	7	7	7	7	7	7	7	7	3	3	3	3	3	3	3	3	3	3	1	1	2	1	1	1	1	1	0	0	1	1	0	0	0	0	0	2	2	0	4	2	3	0	0	4	0
	6	6	7	7	6	6	6	7	6	6	7	6	2	2	1	1	1	1	2	1	2	1	1	3	3	2	4	2	2	2	1	1	1	1	1	1	1	1	1	1	0	1	2	1	1	2	3	1	1
	6	6	7	7	6	6	6	7	4	6	7	6	2	2	2	2	2	2	2	1	2	2	3	3	3	2	2	2	3	2	1	1	1	1	0	0	1	1	0	1	1	1	0	1	1	0	0	0	0
	7	6	6	6	5	5	2	2	6	5	2	5	1	2	3	2	2	2	2	2	0	3	1	4	2	1	3	3	1	1	1	0	1	0	0	0	0	0	0	0	0	0	0	1	0	0	0	0	1
	7	6	6	6	5	4	2	2	6	5	2	5	1	2	3	2	2	2	2	2	0	3	1	4	2	1	3	3	1	1	1	0	1	0	0	0	0	0	0	0	0	0	0	1	0	0	0	0	1
	5	5	5	5	5	5	5	6	5	6	5	5	2	2	2	2	2	2	2	2	2	2	2	2	2	2	2	2	2	2	0	0	0	0	0	0	0	0	0	1	0	0	0	0	0	0	0	0	1
	6	6	6	6	6	6	6	6	4	5	6	5	3	3	3	3	3	3	3	3	3	3	3	2	2	1	1	1	2	1	1	1	1	1	0	0	0	0	0	3	3	1	3	3	3	3	3	2	3
	6	6	6	6	6	6	6	6	6	6	6	6	2	2	2	2	2	2	2	2	2	2	1	1	3	1	1	2	2	1	1	1	1	1	1	0	0	0	0	0	0	2	0	2	0	0	2	0	0
	6	6	6	6	6	6	6	6	6	6	6	6	2	2	2	2	2	2	2	2	2	2	1	1	3	1	1	2	2	1	1	1	1	1	1	0	0	0	0	0	0	2	0	2	0	0	2	0	0
	4	5	6	5	5	5	4	5	5	5	5	5	2	2	1	3	1	2	1	2	1	2	3	3	3	3	1	3	3	2	1	1	1	1	0	0	1	1	0	0	1	0	2	2	1	1	0	0	1
	7	7	7	7	7	7	7	7	7	7	7	7	2	3	3	3	3	2	2	3	3	3	2	1	1	1	1	1	1	1	0	0	1	1	0	0	1	1	0	0	0	0	0	1	0	0	0	0	0
	7	7	7	7	7	7	7	7	7	7	7	7	2	3	3	3	3	2	2	3	3	3	2	1	1	1	1	1	1	1	0	0	1	1	0	0	1	1	0	0	0	0	0	1	0	0	0	0	0
	1	1	6	6	3	3	3	7	1	1	7	2	0	1	1	2	2	1	1	1	0	0	4	4	3	4	4	3	2	4	3	3	3	3	3	3	2	1	1	1	0	0	1	3	1	1	1	1	3
	1	1	6	6	3	3	3	7	1	1	7	2	0	1	1	2	2	1	1	1	0	0	4	4	3	4	4	3	2	4	3	3	3	3	3	3	2	1	1	1	0	0	1	3	1	1	1	1	3
	7	7	7	7	7	7	7	4	7	7	4	4	2	2	2	2	1	2	2	2	2	2	2	1	3	1	1	1	3	1	0	0	0	1	0	0	0	0	0	0	0	0	0	1	0	0	0	0	0
	4	7	7	7	7	7	7	4	7	7	4	4	2	2	2	2	1	2	2	2	2	2	2	1	3	1	1	1	3	1	0	0	0	1	0	0	0	0	0	0	0	0	0	1	0	0	0	0	0
	6	6	6	6	6	6	6	6	4	5	6	5	3	3	3	3	3	3	3	3	3	3	3	2	2	1	1	1	2	1	1	1	1	1	0	0	0	0	0	2	2	0	2	2	2	2	2	1	2
	5	5	6	6	5	6	5	6	6	6	6	6	3	3	2	2	2	2	2	2	2	2	1	1	2	1	1	1	2	3	1	1	1	1	2	1	0	0	1	1	2	1	1	1	2	2	2	1	0
	6	1	7	7	1	1	1	7	1	1	7	1	0	3	1	2	3	3	3	1	3	3	1	1	4	1	1	4	1	1	0	0	0	0	0	0	0	0	0	0	0	0	0	0	0	0	0	0	0
	4	6	5	6	6	4	5	6	6	6	6	6	2	2	3	2	2	2	2	3	2	2	3	2	2	1	1	1	1	1	0	0	0	1	0	0	0	0	0	0	0	0	0	0	0	0	0	0	0
	6	7	7	7	6	6	6	7	6	6	7	4	2	2	2	2	2	2	2	2	2	2	2	1	2	2	2	2	2	1	1	0	0	1	1	0	1	1	0	1	0	3	1	2	1	0	3	0	1
	3	4	4	5	6	3	5	6	5	6	5	6	2	2	2	2	2	2	2	2	1	2	3	2	2	2	2	2	2	3	1	0	1	0	1	0	1	0	1	1	2	3	2	3	1	2	3	1	1
	7	7	7	7	7	7	7	7	7	7	7	7	2	2	3	2	3	3	2	3	3	3	1	3	4	1	4	4	1	1	0	0	0	0	0	0	0	0	0	0	0	0	0	0	0	0	0	0	0
	6	2	7	7	7	7	7	7	7	7	7	7	3	3	2	2	3	3	3	0	0	0	2	2	1	1	1	1	1	1	1	1	1	1	1	1	1	1	1	2	2	2	2	2	2	1	1	1	1
	6	2	7	7	7	7	7	7	7	7	7	7	3	3	2	2	3	3	3	0	0	0	2	2	1	1	1	1	1	1	1	1	1	1	1	1	1	1	1	2	2	2	2	2	2	1	1	1	1
	7	7	7	7	7	7	7	7	7	7	7	7	3	3	0	3	0	3	3	0	0	3	1	1	1	1	1	1	1	1	0	0	0	0	0	0	0	0	0	0	0	0	0	0	0	0	0	0	0
	7	7	6	7	6	6	5	6	6	7	6	6	2	2	2	2	2	2	3	2	2	3	2	3	2	2	4	3	1	2	1	2	2	3	3	2	3	1	3	2	2	0	3	2	3	2	2	3	0
	7	7	6	7	6	6	5	6	6	7	6	6	2	2	2	2	2	2	3	2	2	3	2	3	2	2	4	3	1	2	1	2	2	3	3	2	3	1	3	2	2	0	3	2	3	2	2	3	0
	2	2	7	7	7	7	7	7	7	7	7	7	2	2	2	2	1	2	2	1	2	2	1	1	1	1	1	1	1	1	0	0	0	0	0	0	0	0	0	0	0	0	0	0	0	0	0	0	0
	6	6	5	4	2	5	6	5	5	5	4	5	2	2	1	2	3	2	1	3	1	3	2	1	1	1	1	1	4	2	0	0	0	0	1	0	0	0	0	0	0	0	0	0	0	0	0	0	0
	6	6	5	4	2	5	6	5	5	5	4	5	2	2	1	2	3	2	1	3	1	3	2	1	1	1	1	1	4	2	0	0	0	0	1	0	0	0	0	0	0	0	0	0	0	0	0	0	0
	1	7	7	7	7	7	1	7	7	7	1	1	3	3	3	3	2	3	3	0	1	3	1	1	1	1	1	1	4	3	0	0	0	1	1	0	1	1	1	2	2	3	2	0	0	0	0	0	0
	1	7	7	7	7	7	1	7	7	7	1	1	3	3	3	3	2	3	3	0	1	3	1	1	1	1	1	1	4	3	0	0	0	1	1	0	1	1	1	2	2	3	2	0	0	0	0	0	0
	4	6	6	6	7	4	5	3	6	6	4	2	2	2	2	2	2	2	2	3	2	3	1	1	2	2	1	1	2	1	0	1	1	3	3	0	0	0	0	0	0	0	0	1	0	0	0	0	0
	4	6	6	6	7	4	5	3	6	6	4	2	2	2	2	2	2	2	2	3	2	3	1	1	2	2	1	1	2	1	0	1	1	3	3	0	0	0	0	0	0	0	0	1	0	0	0	0	0
	4	4	3	3	4	4	4	2	4	4	2	4	2	3	3	2	3	2	3	3	3	3	3	3	2	3	3	3	3	2	1	0	2	2	1	1	1	1	1	0	1	1	1	1	0	0	0	1	0
	7	7	7	7	7	7	7	7	7	7	7	7	2	2	3	2	3	3	2	3	3	3	1	1	2	1	1	1	1	1	0	0	0	0	0	0	0	0	0	0	0	0	0	0	0	0	0	0	0
	6	6	7	7	6	6	4	6	5	6	6	5	2	1	1	2	1	2	1	2	1	2	1	1	1	2	2	1	2	3	0	1	1	0	0	1	0	0	0	0	1	0	1	2	1	1	2	2	1
	3	5	6	6	4	5	5	6	5	4	6	4	2	2	2	2	2	2	2	2	2	2	3	2	3	2	3	2	2	2	1	0	0	1	1	0	0	1	0	2	1	1	0	1	1	1	0	0	1
	3	5	6	6	4	5	5	6	5	4	6	4	2	2	2	2	2	2	2	2	2	2	3	2	3	2	3	2	2	2	1	0	0	1	1	0	0	1	0	2	1	1	0	1	1	1	0	0	1
	7	6	6	6	6	6	6	6	6	6	6	6	2	2	2	2	1	2	2	1	1	1	3	3	2	3	3	2	3	3	1	1	1	1	1	1	1	0	0	0	0	0	0	0	0	0	0	0	0
	4	5	7	7	7	6	6	6	6	6	7	6	2	2	3	2	3	2	2	2	3	3	1	1	1	1	1	1	1	1	1	1	1	1	1	0	1	1	1	0	0	0	2	2	0	0	0	2	0
	4	5	7	7	7	6	6	6	6	6	7	6	2	2	3	2	3	2	2	2	3	3	1	1	1	1	1	1	1	1	1	1	1	1	1	0	1	1	1	0	0	0	2	2	0	0	0	2	0
	6	6	6	6	4	4	4	4	4	4	5	4	2	2	2	2	2	2	2	1	2	2	4	4	2	1	2	2	2	4	2	2	2	2	0	1	1	1	0	1	0	1	0	2	1	0	2	1	1
	7	7	7	6	7	7	7	7	7	7	7	7	1	3	3	3	0	0	0	1	1	2	1	1	4	1	2	1	2	1	1	1	1	1	0	0	0	0	0	0	0	0	0	3	0	0	0	0	0
	6	6	4	5	5	4	4	3	4	4	6	3	0	2	2	2	1	2	1	1	1	1	2	3	2	2	3	2	3	3	1	1	1	1	1	1	1	1	1	2	2	0	2	2	2	2	2	2	2
	6	6	4	5	5	4	4	3	4	4	6	3	0	2	2	2	1	2	1	1	1	1	2	3	2	2	3	2	3	3	1	1	1	1	1	1	1	1	1	2	2	0	2	2	2	2	2	2	2
	6	6	7	7	6	6	6	6	6	6	6	6	2	2	2	2	2	2	2	2	2	2	3	2	2	1	1	2	2	1	0	0	0	0	0	0	0	1	0	2	0	0	0	2	0	0	2	0	0
	6	6	5	5	5	6	6	6	6	6	6	6	2	2	2	2	1	2	1	1	2	3	3	2	3	2	3	3	3	3	1	1	1	1	1	1	1	1	0	1	1	0	1	1	2	1	1	1	1
	4	4	4	4	4	4	4	4	4	4	4	4	2	2	1	2	1	2	2	1	1	1	3	3	1	3	3	2	3	2	1	2	2	3	3	3	1	2	2	1	2	0	0	3	3	2	1	0	2
	5	5	5	5	5	4	4	4	5	5	6	4	3	3	2	2	2	3	2	2	1	2	2	1	1	1	2	1	2	2	1	1	0	1	1	0	1	0	0	1	1	0	1	2	1	1	1	0	1
	6	6	5	5	5	6	6	6	6	6	6	6	2	2	2	2	1	2	1	1	2	3	3	2	3	2	3	3	3	3	1	1	1	1	1	1	1	1	0	1	1	0	1	1	2	1	1	1	1
	6	6	6	6	4	4	4	4	4	4	5	4	2	2	2	2	2	2	2	1	2	2	4	4	2	1	2	2	2	4	2	2	2	2	0	1	1	1	0	1	0	1	0	2	1	0	2	1	1
	6	6	6	6	6	6	6	5	6	6	6	6	2	2	2	2	2	2	2	2	2	2	2	2	1	2	1	2	2	2	1	2	0	1	0	0	1	0	0	0	0	0	0	2	1	2	0	1	1
	7	1	7	7	7	7	7	7	7	7	7	7	3	3	3	3	0	3	3	0	3	3	1	1	1	1	1	1	1	1	0	0	0	0	0	0	0	0	0	0	0	0	0	0	0	0	2	0	0
	4	5	4	6	4	7	2	6	2	5	6	6	1	2	2	2	1	2	2	2	1	2	3	2	3	1	1	2	3	2	0	0	0	1	0	0	1	0	0	0	1	0	0	0	0	0	0	1	1
	4	5	6	6	4	4	4	7	6	6	7	4	2	3	2	2	1	1	1	2	1	3	3	1	1	1	4	1	1	1	1	1	0	1	1	1	1	1	0	0	0	0	0	0	0	1	0	0	0
	6	6	6	6	6	6	6	4	6	6	6	6	3	3	3	3	3	3	3	3	3	3	2	2	2	1	1	1	1	1	0	1	0	1	0	0	0	0	0	0	0	0	0	1	0	0	0	0	0
	6	6	4	4	6	6	6	6	6	4	6	6	2	2	2	2	2	2	2	2	1	2	1	3	2	3	3	1	3	2	1	1	1	1	1	1	1	1	1	2	2	4	4	4	4	2	4	2	0
	5	5	6	7	6	6	6	5	5	5	6	5	1	2	2	2	2	1	2	2	2	3	1	1	2	1	1	2	1	1	1	0	1	1	0	0	0	0	0	1	0	0	0	0	0	0	0	0	0
	7	7	6	5	7	7	7	6	7	7	6	7	1	1	1	2	1	1	1	1	1	2	2	2	2	2	1	1	3	1	2	2	1	1	3	1	1	2	1	2	2	4	2	4	1	1	1	1	0
	7	7	6	5	7	7	7	6	7	7	6	7	1	1	1	2	1	1	1	1	1	2	2	2	2	2	1	1	3	1	2	2	1	1	3	1	1	2	1	2	2	4	2	4	1	1	1	1	0
	4	5	6	5	4	6	3	7	5	4	6	7	2	1	0	2	0	2	1	1	0	2	2	3	2	3	2	1	3	4	0	2	1	2	3	2	1	3	2	0	2	0	2	1	3	2	1	0	0
	6	7	7	7	6	2	2	7	2	2	2	2	3	3	2	1	1	1	2	3	3	3	1	1	2	1	1	1	3	1	0	0	0	0	0	0	0	1	0	0	0	0	0	0	0	0	0	0	0
	7	7	7	7	7	7	7	7	7	7	7	7	3	3	0	3	0	3	3	0	0	0	1	1	4	1	1	4	1	1	0	0	0	0	0	0	0	0	0	1	1	1	1	1	1	1	1	1	1
	2	6	7	3	1	5	3	6	4	1	1	5	1	2	1	1	1	1	0	2	1	3	3	2	1	1	4	2	1	2	1	1	1	1	1	2	0	1	1	0	1	0	2	4	0	1	4	0	0
	2	6	7	3	1	5	3	6	4	1	1	5	1	2	1	1	1	1	0	2	1	3	3	2	1	1	3	3	1	2	1	1	1	1	1	2	0	1	1	0	1	0	2	4	0	1	4	0	0
	6	6	6	6	6	6	6	7	6	7	7	6	2	2	2	2	2	2	2	2	2	2	2	1	2	1	1	1	2	1	1	1	0	1	1	1	0	0	1	1	1	2	2	2	2	1	2	2	1
	6	6	6	6	6	6	6	7	6	7	7	6	2	2	2	2	2	2	2	2	2	2	2	1	2	1	1	1	2	1	1	1	0	1	1	1	0	0	1	1	1	2	2	2	2	1	2	2	1
	6	6	5	6	5	5	4	5	5	5	5	4	2	2	2	2	1	2	2	1	1	2	3	2	2	3	2	2	4	2	2	1	3	1	2	1	2	2	2	2	1	2	2	2	2	1	2	2	1
	5	6	5	4	5	5	4	4	5	4	3	4	2	1	2	2	2	1	1	2	2	2	3	3	1	2	2	1	3	3	1	1	2	3	2	1	1	1	0	0	1	3	2	3	3	3	2	2	2
	6	7	5	5	7	7	7	7	7	7	4	7	2	2	3	2	2	3	3	0	3	3	3	1	1	2	2	1	2	2	1	1	1	1	0	0	1	1	1	2	3	3	3	3	2	0	1	3	1
	6	6	6	6	6	6	6	3	6	6	6	6	2	2	1	2	2	2	1	2	1	2	1	2	2	4	3	1	2	3	1	1	1	2	1	1	3	3	0	2	1	4	3	2	2	2	1	3	1
	7	7	7	7	7	4	4	4	6	6	6	4	1	2	1	2	1	1	1	1	1	1	4	4	1	2	3	1	1	1	1	0	3	2	2	2	1	1	0	1	1	2	1	2	0	1	2	2	2
	7	7	7	7	7	4	4	4	6	6	6	4	1	2	1	2	1	1	1	1	1	1	4	4	1	2	3	1	1	1	1	0	3	2	2	2	1	1	0	1	1	2	1	2	0	1	2	2	2
	6	6	6	6	6	6	6	6	6	6	6	6	2	2	2	2	1	2	2	1	1	2	1	1	1	2	4	1	4	3	1	1	1	1	1	0	0	1	0	1	1	1	1	1	1	1	4	2	1
	4	6	6	4	7	6	4	3	7	6	4	6	2	2	2	1	3	2	2	2	1	1	3	4	3	3	3	3	3	2	1	2	3	3	1	1	0	0	0	1	1	0	0	0	0	3	0	0	1
	4	6	6	4	7	6	4	3	7	6	4	6	2	2	2	1	3	2	2	2	1	1	3	4	3	3	3	3	3	2	1	2	3	3	1	1	0	0	0	1	1	0	0	0	0	3	0	0	1
	5	5	5	5	5	5	5	4	5	5	5	5	2	2	2	2	1	2	2	1	2	2	1	1	1	1	1	1	1	2	1	0	0	1	1	1	0	1	0	0	0	0	0	0	0	0	0	0	0
	7	7	7	7	6	6	5	7	6	6	7	5	2	2	2	2	2	2	2	1	2	3	2	2	3	1	1	2	2	1	1	1	0	1	0	0	0	1	0	0	0	0	0	0	0	0	0	0	0
	7	7	7	7	6	6	5	7	6	6	7	5	2	2	2	2	2	2	2	1	2	3	2	2	3	1	1	2	2	1	1	1	0	1	0	0	0	1	0	0	0	0	0	0	0	0	0	0	0
	6	6	5	6	5	5	4	5	5	5	5	4	2	2	2	2	1	2	2	1	1	2	3	2	2	3	2	2	4	2	2	1	3	1	2	1	2	2	2	2	1	2	2	2	2	1	2	2	1
	2	2	2	2	2	2	2	2	2	4	3	4	2	2	2	2	2	3	3	1	1	2	4	4	3	4	2	2	2	3	1	1	3	1	2	1	1	0	0	0	0	0	1	2	1	1	2	1	0
	6	6	6	6	6	6	6	4	6	6	6	6	2	2	2	2	2	2	2	2	2	2	1	1	3	2	2	2	2	1	1	1	1	2	1	0	1	2	0	0	0	0	1	1	0	0	0	0	0
	4	4	7	4	4	4	2	2	4	4	2	4	2	2	3	2	2	2	0	0	3	3	4	4	4	3	1	2	1	1	1	1	2	2	2	0	0	0	0	0	0	4	3	0	2	0	4	4	0
	6	7	7	7	6	2	2	7	2	2	2	2	3	3	2	1	1	1	2	3	3	3	1	1	2	1	1	1	3	1	0	0	0	0	0	0	0	1	0	0	0	0	0	0	0	0	0	0	0
	6	6	6	6	6	6	6	6	6	6	6	6	3	3	2	2	2	2	2	2	1	1	3	2	2	3	3	3	3	3	2	1	3	2	1	3	2	0	1	0	1	2	2	3	4	2	3	4	0
	7	7	7	7	7	7	7	7	7	7	7	7	3	3	0	3	0	3	3	0	0	0	1	1	4	1	1	4	1	1	0	0	0	0	0	0	0	0	0	1	1	1	1	1	1	1	1	0	0
	7	7	7	7	6	7	7	7	7	6	7	7	2	3	2	2	3	2	2	0	2	3	3	2	2	3	3	2	3	2	0	0	1	1	1	0	0	0	0	2	1	3	0	2	0	0	1	1	0
	7	7	7	7	6	7	7	7	7	6	7	7	2	3	2	2	3	2	2	0	2	3	3	2	2	3	3	2	3	2	0	0	1	1	1	0	0	0	0	2	1	3	0	2	0	0	1	1	0
	6	6	6	6	6	6	4	6	6	6	6	6	2	3	2	3	2	2	2	2	2	2	3	2	2	1	1	2	1	1	1	0	0	1	1	0	1	0	0	1	0	0	1	0	0	0	0	0	0
	6	7	7	7	7	7	7	7	7	7	7	7	1	2	0	2	1	2	2	1	0	1	1	1	1	1	1	1	3	1	1	0	2	1	3	0	0	1	0	1	0	0	0	0	0	0	0	0	0
	7	7	7	7	6	6	6	7	6	6	7	6	2	3	3	3	3	2	2	2	2	2	3	3	1	2	2	1	1	1	0	0	1	0	0	0	0	0	0	0	0	0	0	1	1	0	0	0	0
	7	7	7	7	6	6	6	7	6	6	7	6	2	3	3	3	3	2	2	2	2	2	3	3	1	2	2	1	1	1	0	0	1	0	0	0	0	0	0	0	0	0	0	1	1	0	0	0	0
	6	6	6	6	6	6	6	2	5	5	5	3	2	1	1	1	1	2	2	2	2	2	1	3	3	1	3	4	2	2	0	1	0	1	0	0	0	0	0	0	0	0	1	0	0	3	0	0	0
	6	6	4	6	6	6	6	5	5	6	4	6	2	2	2	2	2	2	2	2	3	3	1	1	2	1	1	1	1	2	0	0	0	0	0	0	0	0	0	0	0	0	0	0	0	0	0	0	0
	6	6	6	6	6	6	6	5	6	5	6	5	2	2	2	2	2	2	2	2	2	2	1	1	1	1	1	2	1	1	0	0	0	1	1	0	0	0	0	0	0	0	0	0	0	0	0	0	0
	5	5	5	5	5	5	5	5	5	5	5	5	2	2	2	2	2	2	2	2	2	2	1	1	2	1	1	1	1	1	1	0	1	1	1	0	0	0	0	0	0	0	0	0	0	0	0	0	0
	5	5	5	5	5	5	5	5	5	5	5	5	2	2	2	2	2	2	2	1	2	2	1	1	2	1	1	1	1	1	1	0	1	1	1	0	0	0	0	0	0	0	0	0	0	0	0	0	0
	2	2	7	7	7	7	7	7	7	7	7	7	2	2	2	2	1	2	2	1	2	2	1	1	1	1	1	1	1	1	0	0	0	0	0	0	0	0	0	0	0	0	0	0	0	0	0	0	0
	7	7	7	7	7	7	7	6	7	7	7	7	2	1	0	1	0	2	3	2	1	1	1	3	2	3	4	2	2	3	1	3	1	1	1	1	1	1	3	1	3	3	3	1	4	2	1	2	2
	6	6	7	7	5	6	5	7	7	6	7	7	3	3	3	3	3	3	3	0	2	3	3	1	2	1	1	2	1	2	2	0	2	1	1	0	0	0	0	0	0	0	0	0	0	1	0	1	1
	6	6	7	7	5	6	5	7	7	6	7	7	3	3	3	3	3	3	3	0	2	3	3	1	2	1	1	2	1	2	2	0	2	1	1	0	0	0	0	0	0	0	0	0	0	1	0	1	1
	6	6	6	6	6	6	6	6	6	6	6	6	2	2	2	2	2	2	2	1	1	2	2	2	1	2	2	1	2	2	1	0	0	1	1	0	0	0	0	1	0	0	1	2	1	0	2	1	1
	6	6	6	6	6	6	4	6	6	6	6	6	2	3	2	3	2	2	2	2	2	2	3	2	2	1	1	2	1	1	1	0	0	1	1	0	1	0	0	1	0	0	1	1	0	0	0	0	0
	7	7	7	7	7	7	7	7	7	7	7	7	2	2	2	2	1	2	2	1	1	1	1	1	4	1	1	4	1	1	1	1	1	1	1	1	1	1	1	0	0	0	0	0	0	0	0	0	0
	7	7	7	7	7	7	7	7	7	7	7	7	2	2	2	2	1	2	2	1	1	1	1	1	4	1	1	4	1	1	1	1	1	1	1	1	1	1	1	0	0	0	0	0	0	0	0	0	0
	6	6	7	7	7	7	7	7	6	6	7	6	3	3	3	3	3	3	3	0	3	3	4	1	1	1	3	3	1	3	1	0	1	1	0	0	0	0	0	0	0	0	0	0	0	0	0	0	0
	4	4	5	5	4	4	4	4	4	4	4	4	1	2	1	1	1	2	1	2	1	1	3	3	2	3	3	2	2	2	3	1	0	3	3	1	0	2	0	1	2	1	1	3	2	1	1	2	2
	4	4	5	5	4	4	4	4	4	4	4	4	1	2	1	1	1	2	1	2	1	1	3	3	2	3	3	2	2	2	3	1	0	3	3	1	0	2	0	1	2	1	1	3	2	1	1	2	2
	7	7	7	7	7	7	7	7	7	7	7	7	2	2	3	2	2	2	2	2	2	3	1	1	1	1	1	1	1	1	1	1	1	1	1	1	1	1	0	0	0	1	1	1	1	1	0	0	2
	6	6	6	6	6	6	4	4	6	5	4	4	2	2	2	2	2	2	2	1	1	2	2	2	2	2	2	2	3	3	1	1	1	1	1	0	0	1	0	0	1	2	2	2	2	2	2	2	1
	7	7	7	7	7	7	7	5	7	7	7	7	3	2	2	2	1	2	2	1	1	2	2	3	3	2	2	1	3	2	0	0	1	1	0	0	0	0	0	0	0	0	0	1	0	1	0	0	0
	7	7	7	7	7	7	7	7	7	7	7	7	3	3	2	3	1	3	3	0	3	3	3	1	2	2	1	1	4	2	2	1	3	2	1	0	2	2	0	1	2	0	1	3	4	4	2	3	3
	7	7	7	7	7	7	7	7	7	7	7	7	3	3	2	3	1	3	3	0	3	3	3	1	2	2	1	1	4	2	2	1	3	2	1	0	2	2	0	1	2	0	1	3	4	4	2	3	3
	7	7	7	7	7	7	7	7	7	7	7	7	3	3	0	3	0	3	3	0	0	0	1	1	1	1	1	1	4	1	0	0	0	0	0	0	0	0	0	0	0	0	0	0	0	0	0	0	0
	7	7	7	7	7	7	7	7	7	7	7	7	2	2	3	2	2	2	2	2	2	3	1	1	1	1	1	1	1	1	1	1	1	1	1	1	1	1	0	0	0	1	1	1	1	1	0	0	2
	4	4	4	4	4	4	4	4	4	4	4	4	1	1	0	1	2	1	1	2	2	2	3	3	4	1	1	1	1	1	0	0	1	0	0	0	0	0	0	0	0	0	0	0	0	0	0	0	0
	7	7	7	7	7	7	7	7	7	7	7	7	3	3	3	3	3	3	3	0	3	3	1	1	1	1	1	4	1	1	0	0	0	0	0	0	0	0	0	0	0	0	0	0	0	0	0	0	0
	7	7	7	7	7	7	7	7	7	7	7	7	3	3	3	3	3	3	3	3	0	3	1	1	1	1	1	1	1	1	0	0	0	0	0	0	0	0	0	0	0	0	0	0	0	0	0	0	0
	6	6	6	6	6	6	6	5	6	5	6	5	2	2	2	2	2	2	2	2	2	2	1	1	1	1	1	2	1	1	0	0	0	1	1	0	0	0	0	0	0	0	0	0	0	0	0	0	0
	7	7	7	7	7	7	7	7	7	7	7	7	3	3	3	3	3	3	3	3	0	3	1	1	1	1	1	1	1	1	0	0	0	0	0	0	0	0	0	0	0	0	0	0	0	0	0	0	0
	7	7	7	7	7	7	7	7	7	7	7	7	2	2	3	2	2	2	2	2	2	3	3	1	1	1	1	1	1	1	0	0	0	0	0	0	0	0	0	0	0	0	0	0	0	0	0	0	0
	4	6	7	7	7	7	4	4	5	5	5	5	1	1	3	2	2	2	2	2	2	3	3	2	2	2	1	3	1	3	1	1	0	1	0	0	1	0	0	0	1	0	0	0	0	0	0	0	0
	7	7	7	7	7	7	7	7	7	7	7	7	1	2	2	2	1	2	1	1	1	2	2	1	1	1	2	1	1	3	1	1	2	1	3	1	0	1	1	2	2	2	3	2	2	1	2	1	0
	2	2	2	2	2	2	2	2	2	4	3	4	2	2	2	2	2	3	3	1	1	2	4	4	3	4	2	2	2	3	1	1	3	1	2	1	1	0	0	0	0	0	1	2	1	1	2	1	0
	1	1	7	7	1	1	1	7	1	1	7	1	2	2	1	2	1	2	2	1	2	2	4	4	4	1	1	4	3	1	0	0	0	0	0	0	0	1	0	1	0	0	0	0	0	0	0	0	0
	7	4	7	4	7	7	5	6	4	6	7	7	2	2	1	2	1	2	2	1	2	3	4	1	1	2	1	1	1	2	1	0	1	1	1	0	2	1	0	3	1	0	1	1	0	0	0	0	0
	5	5	4	5	5	5	5	3	5	5	4	5	2	2	2	2	2	2	2	1	2	2	2	2	2	2	2	1	2	2	0	0	1	1	0	0	0	0	0	0	0	0	0	0	0	0	0	0	0
	6	6	6	6	6	6	6	6	6	6	6	6	2	2	2	2	1	2	1	1	1	2	1	1	2	1	1	1	3	2	1	1	2	2	2	1	0	1	0	0	0	0	0	3	0	2	3	0	2
	6	6	6	6	6	6	6	6	6	6	6	6	2	2	2	2	1	2	1	1	1	2	1	1	2	1	1	1	3	2	1	1	2	2	2	1	0	1	0	0	0	0	0	3	0	2	3	0	2
	5	5	4	3	5	5	5	3	5	5	4	5	2	2	2	2	2	2	2	1	2	2	2	2	2	2	2	1	2	2	0	0	1	1	0	0	0	0	0	0	0	0	0	0	0	0	0	0	0
	3	4	4	5	6	3	5	6	5	5	5	6	2	2	2	2	2	2	2	2	1	2	3	2	2	2	2	2	2	3	1	0	1	0	1	0	1	0	1	1	2	3	2	3	1	2	3	1	1
	4	7	4	4	7	7	5	2	2	7	7	7	3	3	1	3	1	2	0	0	0	0	1	3	1	3	3	1	1	2	3	3	1	1	3	3	1	3	3	4	4	0	4	4	0	4	4	4	0
	1	1	7	7	1	1	1	7	1	1	7	1	2	2	1	2	1	2	2	1	2	2	4	4	4	1	1	4	3	1	0	0	0	0	0	0	0	1	0	1	0	0	0	0	0	0	0	0	0
	7	5	7	7	7	7	7	7	7	7	7	6	2	3	2	2	2	3	3	3	2	2	2	1	1	1	1	1	3	1	1	0	1	1	1	0	1	1	0	0	0	0	0	1	1	1	0	0	0
	4	5	6	5	5	5	5	4	6	5	4	5	2	2	2	2	1	2	2	2	2	2	1	2	2	2	2	2	2	2	1	1	1	1	1	0	0	0	0	0	1	0	0	0	0	1	1	1	1
	3	3	5	5	3	3	4	5	4	5	5	5	2	2	2	2	2	2	2	2	2	2	3	2	3	1	1	3	2	3	1	0	1	1	1	0	0	1	0	0	0	0	0	0	0	0	0	0	0
	3	3	5	5	3	3	4	5	4	5	5	5	2	2	2	2	2	2	2	2	2	2	3	2	3	1	1	3	2	3	1	0	1	1	1	0	0	1	0	1	1	1	1	1	1	1	1	1	1
	7	7	7	7	7	7	7	7	7	7	7	7	3	3	2	3	2	3	3	0	2	2	3	1	2	1	1	1	1	1	1	1	3	1	1	0	1	1	0	0	0	0	0	0	0	0	1	0	1
	7	7	7	7	7	7	7	7	7	7	7	7	3	3	2	3	2	3	3	0	2	2	3	1	2	1	1	1	1	1	1	1	3	1	1	0	1	1	0	0	0	0	0	0	0	0	1	0	1
	4	5	6	4	4	4	4	3	6	5	4	5	2	2	2	2	1	2	2	2	2	2	1	2	2	2	2	2	2	2	1	1	1	1	1	0	0	0	0	0	1	0	0	0	0	1	1	1	1
	6	6	5	6	6	6	6	6	6	5	6	5	2	2	2	2	2	2	2	2	2	2	3	3	3	2	2	3	2	2	2	2	1	1	0	0	0	0	0	1	1	0	0	0	1	1	0	0	0
	6	6	5	6	6	6	6	6	6	5	5	5	2	2	2	2	2	2	2	2	2	2	3	3	3	2	2	3	2	2	2	2	1	1	0	0	0	0	0	1	1	0	0	0	1	1	0	0	0
	1	1	4	4	4	5	5	5	5	5	5	5	2	2	1	0	3	0	0	3	3	3	4	1	4	1	1	4	1	1	0	0	0	0	0	0	0	0	0	0	0	0	0	1	1	1	1	1	0
	7	6	7	7	6	5	5	7	5	5	7	5	2	2	3	2	3	2	2	2	2	2	2	2	2	1	1	1	1	1	1	0	0	1	1	0	0	0	0	0	0	0	0	0	0	0	0	0	0
	4	4	5	2	2	2	1	1	1	1	1	1	2	2	3	1	2	2	2	2	1	3	3	4	4	2	3	4	4	4	2	1	3	1	3	1	2	1	1	3	2	3	3	3	3	3	3	3	3
	4	4	6	6	6	6	6	6	4	4	4	4	1	1	2	1	1	2	2	2	2	1	3	2	2	2	2	2	2	2	1	0	0	0	0	1	1	1	1	1	0	0	0	0	0	0	0	0	0
	1	1	1	3	3	3	2	3	5	4	3	2	2	2	1	1	1	3	1	1	0	1	2	3	3	3	4	3	3	2	1	2	1	2	3	1	2	1	2	2	3	2	3	2	3	2	2	2	3
	5	6	6	5	7	7	6	4	6	7	4	5	2	2	2	2	3	2	1	1	1	2	2	2	2	3	2	1	3	2	1	1	2	2	1	1	0	0	0	3	2	4	2	3	2	3	2	3	3
	7	7	4	4	7	7	7	3	6	7	3	6	2	2	1	2	1	1	1	2	1	2	3	1	3	1	2	1	2	2	1	0	2	1	0	1	0	1	0	1	0	0	0	1	2	0	1	0	2
	6	6	6	6	6	6	6	6	6	6	6	6	2	2	2	2	2	2	2	2	2	2	2	3	3	1	1	1	2	1	1	1	1	1	1	2	1	1	0	1	1	0	0	1	0	0	1	0	0
	7	7	6	6	6	6	5	4	7	7	4	7	2	2	2	3	1	2	2	1	1	2	3	2	1	2	2	1	1	2	2	2	3	1	1	2	1	0	2	2	3	0	1	3	2	3	3	3	2
	7	7	7	4	7	7	4	4	7	4	4	6	2	2	2	2	2	2	2	2	2	2	2	2	1	1	1	1	1	2	1	0	0	0	0	0	0	0	0	0	0	0	0	0	2	2	2	2	0
	4	5	3	3	4	4	4	4	4	2	4	4	2	2	1	2	2	2	2	1	2	2	2	3	3	1	2	3	4	4	1	1	1	1	1	1	3	0	0	2	0	0	0	0	0	1	1	0	0
	4	5	7	7	5	5	2	7	6	1	7	5	2	2	1	3	2	3	3	1	1	3	3	3	2	1	1	2	3	2	0	0	0	0	1	0	0	0	0	0	0	0	0	0	0	0	0	0	0
	6	6	6	6	6	6	6	6	6	6	6	6	2	2	2	1	1	2	1	2	1	2	2	1	1	1	1	1	1	1	0	0	0	0	0	0	0	0	0	0	0	0	0	0	0	0	0	0	0
	6	6	6	6	6	6	6	6	6	6	6	6	2	2	2	2	2	2	2	2	2	2	2	2	3	1	1	1	2	1	1	1	1	1	1	2	1	1	0	1	1	0	0	1	0	0	1	0	0
	7	7	4	4	7	7	7	3	6	7	3	6	2	2	1	2	1	1	1	2	1	2	3	1	3	1	2	1	2	2	1	0	2	1	0	1	0	1	0	1	0	0	0	1	1	0	1	0	2
	1	1	7	7	1	1	1	1	1	1	7	1	2	2	1	1	2	2	1	1	1	2	4	4	3	3	3	4	3	3	1	1	1	1	0	1	1	1	1	3	2	0	2	2	2	2	0	3	1
	5	5	5	5	5	5	5	5	5	5	5	5	2	2	2	2	2	2	2	2	2	2	2	2	2	2	2	2	2	2	0	0	0	0	0	0	0	0	0	1	0	0	0	0	0	0	0	0	0
	6	6	6	5	6	4	6	4	6	3	6	6	1	2	1	2	2	2	2	2	1	1	1	2	3	1	3	1	3	2	0	1	3	1	1	3	0	1	1	2	1	2	2	2	1	2	0	0	0
	6	6	6	6	6	6	6	6	6	6	6	6	2	2	2	2	1	2	2	1	1	2	1	3	2	2	1	1	2	2	1	1	1	1	0	0	1	0	0	0	1	0	0	0	0	0	0	0	0
	6	6	6	6	6	6	6	6	6	6	6	6	2	2	2	2	1	2	2	1	1	2	1	3	2	2	1	1	2	2	1	1	1	1	0	0	1	0	0	0	1	0	0	0	0	0	0	0	0
	6	7	6	6	7	5	7	7	7	7	7	7	3	2	1	2	1	3	3	3	3	3	1	1	1	1	1	1	1	1	0	0	0	0	0	0	1	0	0	0	0	0	0	0	0	1	0	0	0
	6	7	6	6	7	5	7	7	7	7	7	7	3	2	1	2	1	3	3	3	3	3	1	1	1	1	1	1	1	1	0	0	0	0	0	0	1	0	0	0	0	0	0	0	0	1	0	0	0
	4	4	4	4	4	4	4	4	4	4	4	4	2	2	2	2	2	2	2	2	2	2	3	2	3	2	2	2	2	2	0	0	0	0	0	0	0	0	0	0	0	0	0	0	0	0	0	0	0
	6	6	6	6	6	6	6	5	5	4	4	6	2	2	3	2	2	2	2	2	2	2	2	1	1	1	1	1	1	1	0	0	1	1	0	0	0	1	0	0	0	1	1	1	0	1	1	0	0
	4	6	6	6	4	4	4	4	5	5	6	4	2	2	2	2	2	2	2	2	2	2	2	2	3	3	3	2	2	2	1	2	1	1	1	0	0	2	0	2	2	0	2	1	1	2	1	2	2
	4	4	4	4	4	4	4	4	4	4	4	4	1	2	1	2	1	2	1	2	2	2	3	3	2	3	3	2	3	3	1	1	1	1	0	1	0	0	1	1	1	0	1	4	1	2	0	1	1
	4	4	4	4	4	4	4	4	4	4	4	4	1	2	1	2	1	2	1	2	2	2	3	3	2	3	3	2	3	3	1	1	1	1	0	1	0	0	1	1	1	0	1	4	1	2	0	1	1
	4	4	4	4	4	4	4	4	4	4	4	4	2	2	2	2	2	2	2	2	2	2	1	1	2	1	1	2	1	1	0	0	0	0	0	0	0	0	0	0	0	0	0	0	0	0	0	0	0
	7	7	5	5	7	7	7	7	7	7	4	7	3	3	3	3	3	3	2	3	2	2	1	1	1	1	2	1	2	2	1	1	2	1	0	0	0	0	0	0	0	0	0	0	0	0	0	2	0
	6	6	6	6	6	6	6	6	6	6	6	6	2	2	1	2	1	2	2	2	1	2	1	1	2	1	1	1	2	1	1	0	0	1	1	0	0	0	0	0	0	0	0	0	0	0	3	1	0
	7	7	7	7	7	7	7	6	7	7	7	6	2	2	2	2	2	2	1	2	1	3	1	1	2	1	1	1	2	2	1	0	0	0	0	1	0	0	0	2	2	0	0	2	1	1	2	2	0
	6	6	6	6	6	6	6	6	6	6	6	6	2	2	1	2	1	2	2	2	1	2	1	1	2	1	1	1	2	1	1	0	0	1	1	0	0	0	0	0	0	0	0	0	0	0	3	1	0
	3	3	5	4	3	4	4	4	4	4	4	4	2	2	1	2	2	2	2	2	1	2	4	4	3	3	3	3	3	3	1	1	1	1	0	2	1	1	1	1	2	4	3	2	3	2	3	2	2
	7	7	7	7	7	7	7	7	7	7	7	7	2	2	2	2	2	2	2	2	2	3	3	1	2	2	2	1	2	2	1	1	1	1	1	1	1	1	1	2	1	1	1	1	2	1	2	1	1
	5	5	5	5	5	5	5	5	5	5	5	5	2	2	1	2	1	1	1	1	1	2	3	3	2	1	1	1	4	3	3	3	1	3	1	1	3	1	0	3	3	3	3	4	1	2	1	4	4
	5	5	5	5	5	5	5	5	5	5	5	5	2	2	1	2	1	1	1	1	1	2	3	3	2	1	1	1	4	3	3	3	1	3	1	1	3	1	0	3	3	3	3	4	1	2	1	4	4
	6	6	6	6	7	6	7	6	6	7	6	6	3	2	1	2	1	1	2	1	1	2	3	3	3	3	3	2	4	3	1	1	1	1	1	1	1	1	1	0	0	0	0	0	2	2	2	2	2
	6	6	6	6	6	6	6	6	6	6	6	6	2	2	3	2	1	2	2	1	1	1	2	2	2	3	2	3	3	3	1	1	1	1	2	2	1	1	0	2	2	2	2	2	2	0	0	2	2
	5	5	5	5	5	5	6	6	5	5	6	5	2	2	1	2	2	2	2	1	1	2	2	1	2	3	2	1	2	2	1	1	1	1	2	1	1	1	1	3	2	1	1	3	2	3	3	1	1
	5	5	5	5	5	5	6	6	5	5	6	5	2	2	1	2	2	2	2	1	1	2	2	1	2	3	2	1	2	2	1	1	1	1	2	1	1	1	1	3	2	1	1	3	2	3	3	1	1
	2	3	1	5	6	5	7	5	6	5	6	6	2	1	1	1	1	1	2	2	1	1	1	2	4	2	1	3	1	4	1	2	1	2	0	2	1	2	1	1	2	1	1	1	2	3	2	4	0
	4	5	6	5	6	6	4	4	5	5	5	5	2	2	1	2	1	2	1	1	2	2	3	3	2	1	1	1	3	1	1	1	2	1	1	1	0	0	0	0	1	0	1	1	1	1	1	2	0
	6	6	6	6	6	6	6	3	6	6	6	6	2	2	1	2	2	2	1	2	1	2	1	2	2	4	3	1	2	3	1	1	1	2	1	1	3	3	0	1	0	3	2	1	1	1	0	2	1
	4	6	2	6	2	2	2	6	6	2	6	6	1	1	1	2	1	1	1	1	2	2	1	2	1	1	1	2	2	1	1	1	2	2	2	0	0	3	1	1	0	0	0	0	0	0	0	0	0
	6	6	7	4	6	6	5	4	6	5	5	6	1	2	2	2	1	1	1	1	1	2	2	2	3	2	2	1	4	2	1	2	1	1	1	1	1	1	1	1	1	1	1	2	1	1	1	1	0
	6	6	6	6	6	6	6	6	6	6	6	6	3	3	3	3	3	3	3	3	3	3	4	3	2	3	3	4	4	4	2	1	3	3	3	0	0	1	1	2	3	3	3	2	2	1	4	2	2
	7	7	7	7	7	7	7	7	7	7	7	7	3	3	2	3	2	3	2	3	3	3	3	2	2	3	3	1	1	2	1	1	1	1	1	0	1	0	0	1	0	2	1	0	1	0	0	0	0
	5	5	4	4	4	5	5	5	5	5	5	5	3	3	2	3	2	3	2	2	2	2	1	4	2	1	1	1	1	1	1	0	1	1	0	0	0	0	0	0	0	0	0	0	2	0	0	0	0
	6	6	6	6	6	6	6	6	6	6	6	6	3	3	0	3	0	3	3	0	0	0	2	2	3	2	2	3	2	2	0	0	0	0	0	0	0	0	0	0	0	0	0	0	0	0	1	1	1
	6	5	6	6	6	4	5	6	6	7	7	5	1	3	3	2	2	2	1	1	2	2	3	1	1	1	1	1	1	1	1	1	0	1	1	0	1	0	0	1	0	3	2	0	0	0	0	0	1
	7	7	7	7	7	7	7	7	7	7	7	7	3	3	2	3	2	3	2	3	3	3	3	2	2	3	3	1	1	2	1	1	1	1	1	0	1	0	0	1	0	2	1	0	1	0	0	0	0
	6	6	4	3	4	5	4	2	6	5	4	6	2	1	1	2	1	1	1	1	0	1	4	3	4	4	3	2	4	3	2	2	3	3	3	2	3	1	1	2	3	0	2	2	3	3	4	3	3
	1	1	5	2	2	2	2	2	2	2	6	2	2	3	3	3	0	0	3	0	0	0	4	1	1	4	1	1	4	4	3	3	3	3	3	3	3	3	3	4	4	4	4	4	4	4	4	4	4
	6	6	6	6	6	6	6	6	6	6	6	6	2	2	2	2	1	2	2	1	2	2	3	3	1	3	3	1	4	3	1	1	1	1	1	1	1	1	1	1	1	1	1	1	1	1	1	1	1
	6	6	6	6	6	6	6	6	6	6	6	6	2	2	2	2	1	2	2	1	2	2	3	3	1	3	3	1	4	3	1	1	1	1	1	1	1	1	1	1	1	1	1	1	1	1	1	1	1
	6	6	6	6	7	6	7	6	6	7	6	6	3	2	1	2	1	1	2	1	1	2	3	3	3	3	3	2	4	3	1	1	1	1	1	1	1	1	1	1	1	1	1	1	3	3	3	3	3
	6	6	6	6	6	6	6	6	6	6	6	6	2	2	2	2	2	2	2	1	1	2	1	1	1	1	1	1	1	1	0	0	0	0	2	0	1	1	0	0	0	3	3	2	2	2	2	1	1
	7	7	7	7	7	7	7	7	7	7	7	7	2	3	3	2	3	3	3	1	2	2	3	2	1	3	1	1	1	1	1	1	1	1	1	1	1	1	1	1	0	1	1	1	1	1	1	1	1
	4	5	7	7	5	5	2	7	6	1	7	5	2	2	1	3	2	3	3	1	1	3	3	3	2	1	1	2	3	2	0	0	0	0	1	0	0	0	0	0	0	0	0	0	0	0	0	0	0
	6	6	7	4	6	6	5	4	6	5	5	6	1	2	2	2	1	1	1	1	1	2	2	2	3	2	2	1	4	2	1	2	1	1	1	1	1	1	1	1	1	1	1	2	1	1	1	1	0
	4	4	4	4	4	4	6	6	6	6	4	6	2	2	2	2	2	2	2	1	1	2	2	2	1	1	1	1	1	2	1	1	1	1	0	1	1	1	0	0	0	0	0	0	0	0	0	0	0
	6	6	5	4	6	6	6	4	6	6	4	5	2	2	3	3	2	2	2	2	2	3	3	3	2	2	2	1	1	3	0	0	1	1	1	0	0	0	0	0	0	0	0	0	0	0	2	1	1
	5	5	5	5	5	5	4	4	5	4	4	5	2	2	1	3	1	1	1	2	0	0	2	2	2	3	2	2	2	2	1	1	1	1	1	1	0	1	1	1	1	0	0	3	3	3	1	2	0
	5	5	5	5	5	5	4	4	5	4	4	5	2	2	1	3	1	1	1	2	0	0	2	2	2	3	2	2	2	2	1	1	1	1	1	1	0	1	1	1	1	0	0	3	3	3	1	2	0
	5	6	6	6	6	6	6	6	6	6	6	6	2	2	2	2	2	2	1	1	2	2	2	2	3	3	1	3	2	1	1	1	1	2	2	0	1	1	0	0	0	0	0	0	2	1	1	1	1
	4	4	4	4	4	4	6	6	6	6	4	6	2	2	2	2	2	2	2	1	1	2	2	2	1	1	1	1	1	2	1	1	1	1	0	1	1	1	0	0	0	0	0	0	0	0	0	0	0
	4	4	4	4	4	4	4	4	4	4	4	4	3	3	3	3	3	3	3	3	3	3	1	1	1	1	1	1	1	1	0	0	0	0	0	0	0	0	0	0	0	0	0	0	0	0	0	0	0
	4	4	4	4	4	4	4	4	4	4	4	4	3	3	3	3	3	3	3	3	3	3	1	1	1	1	1	1	1	1	0	0	0	0	0	0	0	0	0	0	0	0	0	0	0	0	0	0	0
	7	7	7	7	7	7	7	7	3	6	7	6	2	2	1	2	1	2	2	1	2	2	3	2	2	1	3	1	1	1	1	1	0	0	0	0	0	0	0	2	1	0	1	1	0	1	0	0	0
	6	6	6	6	6	6	4	5	5	6	6	6	2	2	2	2	2	2	2	1	2	2	3	4	3	3	1	1	1	1	1	1	1	1	1	1	1	1	1	0	1	0	1	2	1	1	2	1	0
	5	5	5	5	5	5	5	5	5	5	5	5	2	2	1	2	1	2	2	2	2	2	3	3	1	3	3	1	3	3	2	2	2	2	0	1	1	1	1	1	2	2	2	2	2	2	2	2	2
	4	4	5	5	4	5	2	3	4	3	4	4	2	2	1	2	2	2	2	2	2	2	3	3	3	2	1	3	2	3	1	1	1	1	1	0	0	0	0	0	0	0	1	1	0	0	1	1	1
	4	6	6	6	5	6	4	5	5	5	5	5	2	3	2	2	2	2	2	1	1	2	3	3	3	3	2	1	3	2	1	1	2	2	1	1	1	1	0	2	1	0	1	2	2	2	2	2	2
	4	6	6	6	5	6	4	5	5	5	5	5	2	3	2	2	2	2	2	1	1	2	3	3	3	3	2	1	3	2	1	1	2	2	1	1	1	1	0	2	1	0	1	2	2	2	2	2	2
	2	3	4	4	4	3	2	2	4	4	5	2	2	2	2	2	2	2	2	1	2	2	1	2	4	1	3	3	1	2	1	1	0	1	1	0	0	0	0	0	0	0	0	2	0	2	1	0	1
	7	7	7	7	7	7	7	7	7	7	7	7	3	3	3	3	3	3	3	0	3	3	1	1	2	1	1	1	3	3	0	0	0	0	0	0	0	0	0	0	0	0	0	0	0	0	0	0	1
	7	7	7	7	7	7	7	7	7	7	7	7	3	3	2	3	3	3	3	3	3	3	1	1	1	1	1	1	1	1	2	0	1	1	0	0	0	0	0	0	0	0	0	0	0	0	0	0	0
	7	7	7	7	7	7	7	7	7	7	7	7	3	3	2	3	3	3	3	3	3	3	1	1	1	1	1	1	1	1	2	0	1	1	0	0	0	0	0	0	0	0	0	0	0	0	0	0	0
	2	2	6	5	2	4	5	5	2	5	6	2	2	2	2	2	2	2	2	1	1	2	3	4	2	2	2	2	3	3	1	2	2	1	1	1	2	1	2	2	2	1	2	2	2	1	1	1	1
	2	2	6	5	2	4	5	5	2	5	6	2	2	2	2	2	2	2	2	1	1	2	3	4	2	2	2	2	3	3	1	2	2	1	1	1	2	1	2	3	3	2	3	3	3	2	2	2	2
	6	6	6	6	6	6	6	6	6	6	6	6	2	2	3	2	3	3	2	0	3	3	1	1	2	2	3	1	1	2	0	0	1	1	0	0	1	0	0	0	0	0	0	0	0	0	0	0	0
	7	7	7	4	7	7	6	4	7	7	5	7	2	3	3	2	3	3	3	3	3	3	1	2	4	1	1	1	1	1	1	0	1	1	2	0	0	1	0	0	0	0	0	1	0	0	0	1	0
	4	4	6	6	6	6	6	6	4	4	4	4	1	1	2	1	1	2	2	2	2	1	3	2	2	2	2	2	2	2	1	0	0	0	0	1	1	1	1	1	0	0	0	0	0	0	0	0	0
	4	4	5	2	2	2	1	1	1	1	1	1	2	2	3	1	2	2	2	2	1	3	3	4	4	2	3	4	4	4	2	1	3	1	3	1	2	1	1	4	3	4	4	4	4	4	4	4	4
	4	5	5	5	5	5	3	3	4	4	4	4	2	2	1	2	1	2	2	1	1	1	3	3	2	3	3	2	3	3	1	1	0	3	1	1	0	0	0	1	1	1	1	1	1	1	1	1	2
	6	6	6	5	6	5	6	5	5	6	5	6	2	2	2	2	2	1	2	1	1	2	3	3	1	2	2	2	2	2	1	1	0	3	2	0	0	0	2	1	1	0	1	2	2	2	1	1	0
	4	4	5	5	5	1	1	5	1	1	5	5	2	2	3	2	2	2	2	2	1	1	2	3	3	2	3	3	2	2	1	1	1	1	1	1	1	1	1	2	2	0	1	2	2	1	1	1	1
	4	4	5	5	5	1	1	5	1	1	5	5	2	2	3	2	2	2	2	2	1	1	3	2	2	2	2	2	2	2	1	1	1	1	1	1	1	1	1	2	2	0	1	2	2	1	1	1	1
	7	7	7	7	4	4	4	4	4	7	4	4	3	3	1	3	1	3	2	1	1	2	4	3	3	3	3	2	2	3	1	1	0	2	0	0	1	1	0	0	1	1	0	2	2	3	3	3	2
	7	7	7	7	4	4	4	4	4	7	4	4	3	3	1	3	1	3	2	1	1	2	4	3	3	3	3	2	2	3	1	1	0	2	0	0	1	1	0	0	1	1	0	2	2	3	3	3	2
	6	6	6	6	6	6	4	4	6	6	4	6	2	2	2	2	2	2	2	1	1	2	1	3	3	2	3	2	2	3	2	1	2	1	1	0	1	0	0	0	1	2	2	2	1	2	1	2	1
	6	6	6	6	6	6	7	4	7	7	5	7	2	3	2	2	3	2	2	3	2	3	1	1	2	1	1	1	1	1	1	0	1	1	1	1	0	0	0	0	0	2	0	1	0	0	0	0	1
	6	6	6	6	6	6	7	4	7	7	5	7	2	3	2	2	3	2	2	3	2	3	1	1	2	1	1	1	1	1	1	0	1	1	1	1	0	0	0	0	0	2	0	1	0	0	0	0	1
	4	6	4	3	5	5	4	1	5	6	4	6	2	2	1	2	1	1	1	2	1	1	3	2	2	3	3	2	2	3	2	1	1	1	1	1	1	1	1	3	3	3	3	3	3	3	3	3	3
	6	6	4	6	6	6	6	4	6	6	6	6	2	2	2	1	1	1	1	1	1	2	3	2	4	3	3	1	3	2	3	2	2	2	2	1	2	2	1	2	3	2	2	3	3	3	2	2	0
	5	6	7	7	6	6	4	5	5	6	7	6	2	1	1	2	1	1	2	2	2	1	2	2	3	2	3	3	2	2	1	1	2	1	0	1	1	0	1	0	0	1	2	1	1	0	0	1	0
	6	7	7	7	6	6	6	7	6	6	7	7	2	2	2	2	2	2	2	3	2	3	2	1	2	1	1	1	1	1	1	0	1	1	1	0	0	0	0	0	1	1	0	0	1	1	0	1	0
	6	7	7	7	6	6	6	7	6	6	7	7	2	2	2	2	2	2	2	3	2	3	2	1	2	1	1	1	1	1	1	0	1	1	1	0	0	0	0	0	1	1	0	0	1	1	0	1	0
	3	4	4	4	4	4	4	4	4	4	4	4	2	2	2	2	2	2	1	1	1	2	3	3	2	3	3	2	3	3	1	1	1	1	1	1	1	1	1	1	1	1	2	2	2	1	1	4	2
	5	5	4	6	5	5	5	3	5	6	4	3	2	1	2	2	1	2	2	1	2	2	3	2	2	2	2	1	2	3	2	1	2	2	2	1	1	2	2	2	3	1	3	3	2	2	2	3	1
	5	4	5	6	5	4	4	6	5	6	6	4	2	0	1	0	1	2	1	2	3	2	2	3	4	1	3	4	1	1	0	0	0	0	0	0	0	0	0	0	0	0	0	0	1	0	0	0	0
	6	6	6	6	6	6	6	6	6	6	6	6	2	3	2	3	2	2	2	1	2	3	3	3	2	2	2	1	2	2	1	1	1	1	1	1	1	1	1	2	1	1	1	2	1	0	3	1	1
	5	5	5	5	5	5	5	5	5	5	5	5	2	2	2	2	2	2	2	1	2	2	3	3	2	2	2	1	2	2	1	0	0	1	0	0	0	0	0	0	0	0	0	0	0	0	0	0	3
	6	6	6	6	6	6	6	6	6	6	6	6	2	2	2	2	2	2	2	1	2	2	1	1	1	1	1	1	2	1	0	0	1	1	1	0	0	0	0	0	0	0	0	0	0	0	0	0	0
	6	6	6	6	6	6	6	6	6	6	6	6	2	2	2	2	2	2	2	2	1	2	2	2	1	2	2	1	2	2	1	1	1	1	1	1	1	1	1	0	0	1	1	1	1	1	3	1	1
	1	1	7	7	1	1	1	3	1	1	7	1	0	0	0	0	1	1	0	3	0	0	4	4	4	4	4	3	4	1	3	3	3	3	3	3	3	3	3	4	4	4	4	4	4	4	4	4	4
	1	6	6	6	6	6	4	6	6	6	7	7	3	3	2	2	1	2	3	0	1	2	1	1	2	2	2	4	3	1	0	1	3	2	3	0	3	3	0	0	0	0	0	0	0	0	0	0	0
	1	6	6	6	6	6	4	6	6	6	7	7	3	3	2	2	1	2	3	0	1	2	1	1	2	2	2	4	3	1	0	1	3	2	3	0	3	3	0	0	0	0	0	0	0	0	0	0	0
	6	6	6	6	6	6	6	6	6	6	6	6	3	3	3	3	3	3	3	3	3	3	4	3	2	3	3	4	4	4	2	1	3	3	3	0	0	1	1	2	3	3	3	2	2	1	4	2	2
	5	5	4	6	5	5	5	3	5	6	4	3	2	1	2	2	1	2	2	1	2	2	3	2	2	2	2	1	2	3	2	1	2	2	2	1	1	2	2	1	2	0	2	2	1	1	1	2	1
	6	6	6	6	6	6	6	6	6	6	6	6	2	2	2	2	2	2	2	1	1	3	4	3	3	2	2	2	3	2	1	0	3	1	1	0	1	2	0	0	1	0	1	0	0	0	0	0	0
	5	5	4	6	5	5	5	3	5	6	4	3	2	1	2	2	1	2	2	1	2	2	3	2	2	2	2	1	2	3	2	1	2	2	2	1	1	2	2	2	3	1	3	3	2	2	2	3	1
	2	6	6	6	6	6	6	6	6	6	6	6	1	2	2	2	2	2	2	1	2	2	2	2	2	2	3	3	2	3	1	1	1	1	1	1	1	1	0	1	1	2	2	2	2	2	1	1	2
	2	6	6	6	6	6	6	6	6	6	6	6	1	2	2	2	2	2	2	1	2	2	2	2	2	2	3	3	2	3	1	1	1	1	1	1	1	1	0	1	1	2	2	2	2	2	1	1	2
	4	4	4	4	4	4	4	4	6	4	4	4	1	1	2	1	1	1	1	2	1	2	4	3	4	3	2	3	1	1	2	1	3	3	3	0	3	1	1	0	1	0	1	1	1	2	0	1	1
	5	5	6	5	5	5	4	5	5	5	5	5	2	2	2	2	1	2	2	1	2	2	3	2	2	3	3	2	2	2	1	1	1	1	1	1	1	1	0	1	0	0	0	1	0	0	0	0	1
	5	5	5	5	5	5	5	5	5	5	5	5	2	2	1	2	1	2	2	1	1	1	1	1	4	1	1	4	1	1	0	0	0	0	0	0	0	0	0	0	0	0	0	0	0	0	0	0	0
	5	5	5	5	5	5	5	5	5	5	5	5	2	2	1	2	1	2	2	1	1	1	1	1	4	1	1	4	1	1	0	0	0	0	0	0	0	0	0	0	0	0	0	0	0	0	0	0	0
	4	5	6	5	5	6	5	4	5	5	6	4	2	2	1	2	1	2	2	2	2	3	1	2	2	2	2	3	3	2	2	1	2	2	2	1	1	1	1	2	2	1	2	3	2	2	2	3	2
	4	4	4	4	4	4	4	4	4	4	4	4	2	2	2	2	2	2	2	1	2	2	2	2	1	3	3	2	3	3	2	1	1	0	0	0	0	0	0	1	1	0	0	0	1	1	2	1	1
	4	4	4	4	4	4	4	4	4	4	4	4	2	2	2	2	2	2	2	1	2	2	2	2	1	3	3	2	3	3	2	1	1	0	0	0	0	0	0	1	1	0	0	0	1	1	2	1	1
	5	5	6	5	5	5	4	5	5	5	5	5	2	2	2	2	1	2	2	1	2	2	3	2	2	3	3	2	2	2	1	1	1	1	1	1	1	1	0	1	0	0	0	1	0	0	0	0	1
	3	4	4	5	4	4	4	5	5	5	5	4	2	2	2	2	1	2	2	2	2	2	3	3	1	2	2	1	1	2	2	0	0	0	0	0	0	0	0	1	1	1	1	0	0	0	0	0	1
	6	6	6	6	6	6	6	6	6	6	6	6	2	2	2	2	2	2	2	2	2	2	1	3	4	1	2	1	1	1	0	0	0	0	0	0	0	0	0	0	0	0	0	0	0	0	0	0	0
	5	6	7	7	5	6	5	6	5	6	7	5	2	2	3	2	2	3	1	2	1	3	3	2	2	1	1	2	2	2	1	0	0	1	1	1	1	1	0	0	0	0	0	0	0	0	0	0	0
	6	6	7	6	6	6	5	4	5	6	6	6	2	2	1	2	2	2	1	1	2	2	3	2	1	2	2	1	1	2	1	0	1	2	1	0	0	2	0	0	0	0	0	2	1	0	2	0	1
	7	7	7	7	7	7	5	7	4	6	7	7	3	3	3	3	3	3	3	1	2	3	3	1	2	1	1	2	2	1	1	1	1	1	1	0	0	0	0	3	0	0	0	2	0	0	0	0	0
	7	7	7	7	7	7	7	7	7	7	7	7	2	2	2	2	1	2	2	2	2	1	1	1	1	2	2	1	3	1	1	1	1	1	1	1	1	1	0	0	0	0	0	1	1	1	1	1	1
	7	7	7	7	7	7	5	7	4	6	7	7	3	3	3	3	3	3	3	1	2	3	3	1	2	1	1	2	2	1	1	1	1	1	1	0	0	0	0	3	0	0	0	2	0	0	0	0	0
	6	6	6	6	6	6	6	6	5	6	6	6	2	2	2	2	2	2	2	2	2	3	1	2	1	1	1	2	1	1	1	0	0	1	0	0	0	0	0	0	0	0	0	1	0	0	0	0	0
	7	7	7	7	7	7	7	7	7	7	7	7	2	2	1	2	1	2	2	1	1	2	3	3	1	3	3	2	3	3	1	1	2	1	1	1	1	1	0	2	2	2	2	2	2	2	2	2	2
	4	4	6	6	6	6	6	2	6	4	2	6	2	2	1	2	1	2	2	1	1	1	1	2	1	3	2	2	2	3	1	1	1	1	1	1	1	1	1	2	1	2	2	2	2	2	2	2	0
	4	4	6	6	6	6	6	2	6	4	2	6	2	2	1	2	1	2	2	1	1	1	1	2	1	3	2	2	2	3	1	1	1	1	1	1	1	1	1	2	1	2	2	2	2	2	2	2	0
	6	6	6	6	6	6	6	6	6	6	6	6	1	1	2	1	2	1	1	2	2	2	1	1	4	1	1	4	1	1	0	0	0	0	0	0	0	0	0	0	0	0	0	0	0	0	0	0	0
	6	6	6	6	6	6	6	6	6	6	6	6	2	2	1	2	1	2	2	1	1	1	3	3	2	3	3	2	3	3	1	1	1	1	1	1	1	1	1	2	2	2	2	2	2	2	2	2	2
	5	6	6	5	6	6	4	5	6	6	4	5	2	2	3	2	2	2	2	2	3	3	1	1	2	1	1	2	1	2	1	0	0	1	0	0	1	0	0	0	0	0	0	1	0	0	0	0	0
	1	7	7	7	7	7	7	7	7	7	7	7	3	3	3	3	3	3	3	3	3	3	1	1	2	1	1	1	1	1	1	0	3	3	3	0	0	0	0	0	0	0	0	2	0	0	0	0	0
	6	6	6	6	6	6	6	6	6	6	6	6	3	3	3	3	3	3	3	3	3	3	1	1	1	1	1	1	1	1	0	0	0	0	0	0	0	0	0	0	0	0	0	0	0	0	0	0	0
	1	1	7	7	1	1	1	7	2	7	7	7	3	3	0	3	0	3	3	0	3	2	1	4	1	1	4	1	4	4	3	3	3	3	3	3	3	3	3	4	4	4	4	4	4	4	4	4	4
	1	1	7	7	1	1	1	7	2	7	7	7	3	3	0	3	0	3	3	0	3	2	1	4	1	1	4	1	4	4	3	3	3	3	3	3	3	3	3	4	4	4	4	4	4	4	4	4	4
	6	6	6	6	6	6	6	6	6	6	6	6	2	2	2	2	2	2	2	2	1	2	1	1	2	1	1	1	1	1	3	0	0	1	0	0	0	0	0	0	0	0	0	0	0	0	0	0	0
	6	3	7	3	4	3	4	5	2	3	4	2	0	1	1	0	2	1	2	3	2	3	1	1	1	2	3	4	2	2	1	2	1	0	1	1	2	0	1	2	1	3	1	3	1	1	3	1	2
	6	6	6	6	6	6	6	6	6	6	6	6	3	3	2	2	1	2	2	2	1	2	2	1	4	3	1	2	1	1	0	0	0	0	0	0	0	0	0	0	0	0	0	0	0	0	0	0	0
	7	7	7	7	7	7	7	7	6	6	6	6	2	2	1	2	1	2	2	1	2	2	1	1	4	1	1	1	3	2	0	0	0	0	0	0	0	0	0	1	1	1	0	0	0	0	1	0	0
	6	6	6	6	6	6	6	6	6	6	6	6	2	2	2	2	2	2	2	2	2	3	1	1	1	1	1	1	1	1	0	0	0	0	0	0	0	0	0	0	0	0	0	0	0	0	0	0	0
	7	7	7	7	7	7	7	7	7	7	7	7	1	1	1	1	3	3	2	1	1	1	1	1	2	1	1	1	3	1	3	1	1	1	1	0	0	1	0	1	1	0	1	2	0	0	1	1	0
	5	6	5	4	6	6	5	6	5	6	5	6	2	2	2	2	2	2	2	1	2	2	2	2	2	3	2	1	3	3	1	1	2	1	1	0	1	1	1	2	1	1	1	1	0	0	0	0	0
	4	4	4	4	4	4	4	4	4	4	4	4	2	2	1	2	1	2	2	1	1	1	3	3	2	3	3	2	3	3	1	1	1	1	1	1	1	1	1	2	2	2	2	2	2	2	2	2	2
	2	5	5	5	6	6	6	6	6	6	6	6	1	3	2	2	2	3	2	3	3	3	1	1	2	1	1	1	1	1	0	0	0	0	0	0	0	0	0	0	0	0	0	0	0	0	0	0	0
	7	6	7	7	7	7	7	7	7	7	7	7	1	1	1	1	1	1	0	1	1	0	3	3	2	4	4	2	4	3	0	1	1	2	2	1	0	1	1	3	3	3	2	3	3	3	3	3	3
	7	7	7	7	7	7	5	6	6	6	7	5	2	2	3	2	2	2	2	2	3	3	1	1	2	1	1	1	1	1	1	0	1	0	0	0	0	0	0	0	0	0	0	1	0	0	1	1	0
	5	5	5	5	5	5	5	4	4	5	4	5	2	2	2	2	2	2	2	1	2	2	2	2	2	2	3	2	3	2	1	1	2	2	2	1	1	1	1	2	1	2	1	2	2	1	1	1	1
	6	6	6	6	6	6	6	6	6	6	6	6	2	2	2	2	2	2	2	1	2	2	1	1	1	1	1	4	1	1	0	0	0	0	0	0	0	0	0	0	0	0	0	0	0	0	0	0	0
	6	6	7	7	6	6	6	7	6	6	7	6	2	2	2	2	2	2	2	2	2	2	1	1	2	1	1	2	3	2	0	0	0	0	0	0	0	0	0	0	0	0	0	0	0	0	0	0	0
	6	6	5	5	6	6	5	5	5	6	6	6	2	2	2	2	2	2	2	1	1	2	2	2	2	2	2	1	2	2	0	1	0	1	0	0	0	0	0	2	1	1	1	1	1	1	1	1	1
	6	6	6	6	6	6	6	6	6	6	6	6	2	2	2	2	2	2	2	2	2	2	1	2	1	1	1	1	1	2	1	0	1	1	0	0	0	0	0	0	0	0	0	0	0	0	0	0	0
	1	1	6	6	5	6	6	6	5	5	6	6	2	2	0	2	0	2	1	0	0	0	4	3	3	3	3	3	3	2	1	0	0	1	0	0	0	0	0	1	1	0	1	2	1	1	1	1	1
	6	6	6	6	6	6	6	2	6	6	2	6	1	2	3	1	3	3	2	2	3	3	1	1	1	1	1	1	1	1	0	0	1	1	0	0	0	1	0	0	0	0	0	0	0	0	0	0	0
	6	4	7	6	4	5	4	6	4	5	7	6	1	2	1	0	2	1	2	1	2	2	3	2	2	2	2	2	2	2	3	2	2	3	2	1	1	1	1	2	2	0	2	3	2	3	3	3	2
	4	6	4	4	4	4	5	5	5	5	6	5	2	2	2	2	2	2	2	2	2	2	3	2	2	1	1	2	1	1	0	0	0	0	0	0	0	0	0	0	0	0	0	0	0	0	0	0	0
	6	6	6	6	6	6	6	6	6	6	6	6	0	2	1	2	1	2	2	1	1	3	1	1	1	1	1	1	1	1	0	0	0	0	0	0	0	0	0	0	0	0	0	0	0	0	0	0	0
	1	5	6	6	1	6	1	6	1	1	6	1	2	2	1	2	1	2	2	1	1	1	2	1	4	1	1	3	1	1	0	0	1	1	0	0	0	1	0	0	0	0	0	0	0	0	0	0	0
	1	5	6	6	1	6	1	6	1	1	6	1	2	2	1	2	1	2	2	1	1	1	2	1	4	1	1	3	1	1	0	0	1	1	0	0	0	1	0	0	0	0	0	0	0	0	0	0	0
	6	6	6	4	6	4	3	6	5	6	6	6	1	2	1	1	1	2	1	1	1	1	3	2	2	1	1	1	1	3	1	0	1	0	1	2	2	2	0	1	0	0	0	2	2	0	0	0	0
	6	5	6	4	5	6	5	4	5	6	6	6	1	0	3	1	1	2	1	2	3	2	2	3	3	3	3	1	3	2	2	1	1	2	1	2	1	2	1	2	2	2	2	2	3	2	1	2	2
	5	5	6	6	6	6	3	5	5	5	6	5	2	2	3	2	1	2	2	2	3	3	1	1	1	1	2	1	1	1	0	0	0	0	0	0	0	0	0	0	0	1	0	0	0	0	0	0	0
	1	1	4	1	1	1	1	1	1	1	1	1	1	1	2	1	2	2	2	0	1	2	3	4	1	3	2	1	1	3	0	0	1	0	0	0	1	0	0	0	0	0	0	0	0	0	0	0	0
	1	1	4	1	1	1	1	1	1	1	1	1	1	1	2	1	2	2	2	0	1	2	3	4	1	3	2	1	1	3	0	0	1	0	0	0	1	0	0	0	0	0	0	0	0	0	0	0	0
	6	6	6	6	6	6	6	6	6	6	6	6	2	2	2	2	2	2	2	2	1	2	1	1	2	1	1	1	1	1	3	0	0	1	0	0	0	0	0	0	0	0	0	0	0	0	0	0	0
	6	3	7	3	4	3	4	5	2	3	4	2	0	1	1	0	2	1	2	3	2	3	1	1	1	2	3	4	2	2	1	2	1	0	1	1	2	0	1	2	1	3	1	3	1	1	3	1	2
	7	6	6	5	5	5	4	5	4	4	5	5	1	2	2	2	1	2	2	1	2	2	3	2	2	2	2	2	2	3	2	1	1	2	2	2	1	1	2	2	1	0	0	0	1	1	2	1	1
	5	6	6	6	6	6	6	6	5	6	5	6	2	2	3	3	3	3	2	2	3	3	1	2	3	1	1	3	1	1	2	2	2	1	1	1	1	1	1	1	2	1	1	1	1	2	1	2	1
	7	6	6	5	5	5	4	6	4	4	5	5	1	2	2	2	1	2	2	1	2	2	3	2	2	2	2	2	2	3	2	1	1	2	2	2	1	1	2	2	1	0	0	0	1	1	2	1	1
	7	7	7	7	7	7	7	7	7	7	7	7	3	3	3	3	3	3	3	3	3	3	1	1	1	1	1	1	1	1	0	1	1	0	0	0	0	0	0	0	0	0	0	0	0	0	0	0	0
	5	6	6	6	7	6	6	6	6	6	6	5	3	3	2	3	3	3	2	2	1	1	3	3	2	2	1	2	1	1	0	1	2	0	0	1	0	0	0	3	3	0	3	3	3	3	0	3	0
	7	7	7	7	7	7	7	7	7	7	7	7	2	3	2	3	2	3	3	3	3	3	1	1	1	2	2	1	1	1	1	0	0	1	1	0	3	1	0	2	0	0	0	0	0	0	0	0	0
	6	6	6	6	6	6	4	6	6	6	6	4	2	2	2	2	1	2	2	1	2	2	2	2	3	1	1	3	1	1	0	0	1	0	0	0	1	0	0	0	0	0	0	0	0	0	0	0	0
	7	7	7	7	7	7	7	7	7	7	6	6	2	2	2	2	2	2	2	1	2	2	1	1	3	1	1	1	1	1	1	0	1	1	2	0	0	0	0	0	0	0	1	1	0	0	0	0	0
	4	4	5	5	4	5	4	5	4	5	4	5	1	2	2	2	1	2	2	1	2	2	2	4	3	2	1	3	2	1	0	1	1	1	1	1	0	1	0	1	1	2	0	2	1	2	2	0	2
	1	1	2	6	5	1	1	5	6	5	5	5	2	2	1	2	1	2	2	1	2	2	3	1	1	1	1	4	3	2	0	0	1	0	0	0	0	1	0	0	0	0	0	0	0	0	0	0	0
	4	5	4	4	5	5	4	5	4	4	5	4	2	2	2	2	3	2	2	1	1	1	1	1	1	1	1	1	1	1	1	0	0	0	0	0	0	0	0	1	0	0	0	0	0	0	0	0	0
	6	6	6	5	5	4	4	5	6	6	6	6	3	3	1	2	1	2	2	1	2	3	1	2	1	1	1	1	2	2	2	2	3	2	3	3	3	2	1	2	2	1	1	2	1	2	1	2	1
	2	2	4	1	2	2	2	3	2	2	5	2	2	1	1	2	1	2	1	1	1	2	2	3	3	2	2	1	1	3	2	3	0	0	0	1	0	0	1	3	0	0	0	3	2	3	0	0	0
	7	7	7	7	7	7	7	7	7	7	7	7	2	2	3	3	2	3	2	2	3	3	1	1	1	1	1	1	1	1	1	0	2	1	0	0	0	0	0	0	0	2	0	1	0	0	0	0	0
	5	6	7	7	6	6	6	3	6	7	6	6	2	2	2	2	1	2	2	2	1	2	4	2	2	1	1	1	3	2	2	0	0	1	1	1	1	1	0	1	2	0	1	2	2	1	3	1	2
	5	4	7	7	4	4	3	7	5	5	7	5	2	3	3	2	2	3	2	3	3	3	1	1	2	1	1	1	1	2	1	0	1	1	0	0	0	0	0	1	0	0	0	3	0	0	0	1	1
	4	4	6	2	5	5	5	4	5	4	4	4	2	2	3	2	3	3	3	3	3	3	1	1	1	1	1	1	1	1	1	1	1	0	1	0	0	1	1	0	0	3	3	2	1	0	0	0	0
	5	6	7	6	6	6	6	5	6	6	6	6	3	3	3	0	3	2	2	2	2	2	2	1	2	2	1	1	2	3	1	0	1	1	0	0	0	0	0	0	0	0	0	0	0	0	0	0	0
	2	6	5	2	1	6	5	1	1	6	1	1	3	3	3	3	3	3	3	3	3	3	1	1	1	1	1	1	1	1	0	1	0	0	0	0	0	0	0	0	0	0	0	0	0	0	0	0	0
	5	5	6	5	5	5	5	5	5	5	5	5	2	2	1	2	1	2	2	1	2	2	2	2	2	3	3	3	2	2	1	1	1	1	1	1	1	1	0	2	2	1	2	2	2	2	1	1	2
	6	6	7	7	6	6	6	6	6	6	7	6	3	3	2	3	2	3	3	2	1	3	3	2	1	1	1	2	1	2	0	0	2	2	1	1	0	0	2	2	3	0	1	1	0	0	2	1	0
	4	5	5	5	5	5	4	5	5	5	5	5	2	2	2	2	2	2	2	1	2	2	3	2	3	1	1	2	3	2	1	1	0	1	1	1	1	1	1	1	0	0	1	1	1	1	0	1	1
	4	4	5	4	5	5	4	3	4	4	4	3	2	2	2	2	2	2	2	2	2	2	3	3	4	2	1	2	2	2	0	0	1	1	1	0	1	1	1	1	1	0	1	1	1	1	0	1	1
	5	5	5	6	5	5	6	5	5	6	5	6	2	2	2	2	2	2	2	2	3	3	1	1	2	2	1	2	2	1	0	0	1	0	0	1	1	0	1	2	2	2	2	1	2	1	2	1	2
	6	6	4	4	6	6	6	4	6	6	4	6	1	2	2	2	2	2	2	2	2	2	1	1	2	2	1	2	2	1	1	1	2	1	0	0	0	1	0	1	1	0	0	1	1	0	1	1	1
	7	6	6	6	6	5	4	4	4	4	4	4	1	1	1	2	1	2	2	2	1	2	3	3	2	2	3	2	3	3	1	1	3	1	1	2	2	3	1	3	3	0	0	1	1	1	2	0	1
	7	7	7	7	7	7	7	7	7	7	7	7	2	2	3	3	2	3	2	2	3	3	1	1	1	1	1	1	1	1	1	0	2	1	0	0	0	0	0	0	0	2	0	1	0	0	0	0	0
	6	6	7	7	5	5	4	6	6	4	6	5	3	3	2	2	2	2	2	1	1	2	1	2	1	1	1	1	3	2	1	1	1	1	1	1	1	1	0	0	0	0	0	0	0	0	1	0	0
	6	6	6	6	5	5	4	6	6	4	6	5	3	3	2	2	2	2	2	1	1	2	1	2	1	1	1	1	3	2	1	1	1	1	1	1	1	1	0	0	0	0	0	0	0	0	1	0	0
	7	7	7	7	7	7	7	7	7	7	7	7	3	3	2	3	2	3	3	1	2	2	1	1	1	1	1	1	1	1	1	0	1	1	1	0	0	0	0	0	0	0	0	0	0	0	0	0	0
	6	5	6	6	6	6	4	6	5	4	6	4	2	2	2	2	2	2	2	2	2	3	2	1	3	1	1	1	1	1	0	0	1	0	0	0	0	0	0	0	0	0	0	0	0	0	0	0	0
	6	6	6	6	6	6	6	6	6	6	6	6	2	2	2	2	2	2	2	1	2	2	2	2	1	2	2	1	2	3	1	1	1	2	1	2	1	2	2	3	3	0	1	1	0	1	0	0	0
	6	6	6	6	6	6	6	6	6	6	6	6	2	2	3	2	3	2	2	3	3	3	2	2	2	1	1	1	1	1	1	1	1	1	1	0	0	0	0	0	0	0	0	0	0	0	0	0	0
	5	5	6	6	6	5	5	4	5	5	5	5	2	2	2	2	1	2	2	1	1	2	3	3	3	3	3	2	3	2	1	1	1	1	1	1	1	1	1	2	2	0	2	2	3	3	2	2	2
	4	5	4	4	5	4	4	5	4	5	5	5	1	2	2	2	1	1	1	1	1	2	2	3	4	2	2	2	2	3	2	1	2	2	0	2	1	1	1	2	2	0	2	2	3	2	2	1	1
	3	2	6	6	4	2	2	2	2	4	2	2	2	2	2	2	1	3	2	2	1	3	1	1	1	1	1	1	1	1	3	3	3	3	0	1	0	1	0	2	2	0	1	2	0	2	2	0	0
	3	2	6	6	4	2	2	2	2	4	2	2	2	2	2	2	1	3	2	2	1	3	1	1	1	1	1	1	1	1	3	3	3	3	0	1	0	1	0	2	2	0	1	2	0	2	2	0	0
	4	4	4	4	4	4	4	4	4	4	4	4	1	1	2	1	2	1	1	2	2	2	3	3	2	3	3	2	3	3	1	1	3	2	2	1	1	0	0	2	2	2	2	2	2	2	2	2	1
	4	4	7	4	4	4	4	4	4	4	1	1	2	3	2	3	3	2	3	1	3	3	1	2	3	2	3	3	1	2	1	1	1	0	1	1	1	0	0	1	0	3	1	3	2	2	3	4	3
	4	3	5	3	2	3	4	3	4	3	5	4	2	2	2	3	2	2	1	0	3	1	2	3	3	1	2	2	4	2	1	2	1	2	1	3	1	3	1	1	2	1	1	3	1	3	2	2	3
	6	5	4	3	6	6	6	1	6	6	4	5	2	2	2	2	2	2	2	3	2	2	2	1	2	2	1	1	1	2	0	0	1	1	1	0	0	0	0	0	0	0	0	1	1	1	1	1	1
	7	7	7	7	7	7	7	5	7	7	7	7	2	2	3	1	3	3	2	2	3	3	1	1	1	1	1	1	1	1	0	0	0	0	0	0	0	0	0	0	0	0	0	0	0	0	0	0	0
	6	6	6	7	6	6	6	6	6	6	6	6	2	2	2	2	2	2	2	2	2	2	3	1	3	1	1	1	2	2	1	0	1	1	1	0	0	0	0	0	0	0	0	0	0	0	0	0	0
	7	7	7	7	7	7	7	7	7	7	7	7	3	3	0	3	0	3	3	0	0	0	4	4	1	4	4	1	4	4	3	3	3	3	3	3	3	3	3	4	4	4	4	4	4	4	4	4	4
	6	6	6	6	6	6	4	6	4	4	4	4	2	2	1	2	1	2	2	3	3	3	3	3	3	3	1	3	1	3	0	0	0	0	0	0	0	0	0	0	0	0	0	0	0	0	0	0	0
	6	6	7	7	7	7	7	4	4	7	6	7	3	3	2	3	2	3	2	2	2	2	1	1	2	1	1	4	1	1	0	0	0	0	0	0	0	0	0	1	1	1	1	1	1	1	2	1	1
	6	5	5	5	4	6	5	4	5	5	6	4	2	2	2	2	2	1	1	1	1	2	2	2	3	2	2	2	2	3	1	1	1	1	2	1	2	1	0	0	0	0	2	2	1	2	3	3	1
	6	6	6	6	6	6	6	6	6	6	6	6	3	3	3	3	3	3	2	1	1	3	1	1	1	1	1	1	1	1	0	0	1	1	1	0	0	0	0	0	0	0	0	0	0	0	0	0	0
	4	7	4	4	4	4	4	4	4	4	4	4	2	3	2	3	3	2	3	1	3	3	1	2	3	2	3	3	1	2	1	1	1	0	1	1	1	0	0	1	0	3	1	3	2	2	3	4	3
	6	6	6	6	6	6	6	6	6	6	6	6	2	2	2	2	2	2	2	2	2	2	1	3	4	1	2	1	1	1	0	0	0	0	0	0	0	0	0	0	0	0	0	0	0	0	0	0	0
	6	6	7	7	7	7	7	4	4	7	6	7	3	3	2	3	2	3	2	2	2	2	1	1	2	1	1	4	1	1	0	0	0	0	0	0	0	0	0	0	0	0	0	0	0	0	1	0	0
	7	7	7	6	7	7	6	7	7	7	6	7	3	3	3	3	3	3	3	3	3	3	2	1	4	1	1	1	1	1	1	0	1	1	0	0	0	0	0	0	0	0	0	1	0	0	0	0	0
	7	7	7	7	3	3	2	7	3	7	7	2	1	1	1	1	1	1	1	1	1	1	4	4	4	2	2	4	4	4	3	3	3	3	3	3	3	3	1	3	3	0	0	3	3	3	3	3	2
	6	6	2	4	4	4	2	6	4	6	6	4	2	2	2	2	1	2	2	2	2	2	3	3	4	1	1	3	2	1	0	0	0	0	0	0	0	0	0	0	0	0	0	0	0	0	0	0	0
	7	7	7	7	7	7	7	7	7	7	7	7	2	2	3	3	3	3	3	3	3	3	1	1	3	1	1	1	1	1	0	0	0	1	0	0	0	0	0	0	0	0	0	0	0	0	0	0	0
	7	6	7	7	6	6	5	6	6	6	6	6	3	2	2	2	2	2	1	2	2	2	2	2	2	2	2	2	2	1	1	1	0	2	2	0	0	1	0	0	1	0	1	2	0	1	1	1	0
	5	4	5	4	6	4	6	4	5	5	5	6	2	2	2	2	2	2	2	2	2	2	1	1	1	1	1	2	2	1	1	1	2	1	1	2	0	0	0	2	2	1	2	2	1	2	2	2	1
	7	6	6	5	5	7	7	4	7	5	6	5	3	3	2	3	2	3	2	3	1	3	1	3	1	3	2	1	1	2	0	1	1	1	0	0	0	0	0	1	0	0	1	0	0	1	0	1	0
	7	6	4	6	7	6	6	6	6	6	6	6	1	3	2	3	1	3	2	1	0	3	1	2	1	2	2	1	2	2	1	2	2	2	1	3	3	3	2	3	2	2	2	3	3	3	3	3	3
	5	6	6	7	6	5	6	5	4	5	6	4	1	1	1	2	1	2	2	1	1	1	4	4	4	3	3	1	4	2	0	1	3	1	0	1	0	0	0	2	1	0	0	0	0	0	1	0	0
	6	4	5	5	6	5	5	4	5	7	5	6	2	2	1	2	1	1	1	1	1	2	3	2	4	3	2	2	4	3	2	2	3	2	2	2	1	1	1	2	3	3	3	4	2	3	2	2	1
	6	6	6	6	6	6	6	6	6	6	5	5	2	2	3	2	2	2	2	2	2	2	1	1	2	2	2	2	2	2	1	1	1	1	1	0	0	0	0	0	0	0	0	0	0	0	0	0	0
	5	4	5	4	6	4	6	4	5	5	5	6	2	2	2	2	2	2	2	2	2	2	1	1	1	1	1	2	2	1	1	1	2	1	1	2	0	0	0	2	2	1	2	2	1	2	2	2	1
	7	7	7	7	7	7	7	7	7	7	7	7	3	3	3	3	3	3	3	3	3	3	1	1	1	1	1	1	1	3	0	0	0	0	0	0	0	0	0	0	0	0	0	0	0	0	0	0	0
	4	4	5	5	6	5	6	6	5	5	5	5	1	2	2	2	1	2	2	2	2	2	2	3	1	2	2	2	2	3	0	1	1	1	1	1	0	1	0	1	1	2	0	3	1	2	2	1	0
	4	4	5	5	6	5	6	6	5	5	5	5	1	2	2	2	1	2	2	2	2	2	2	3	1	2	2	2	2	3	0	1	1	1	1	1	0	1	0	1	1	2	0	2	1	2	2	1	0
	6	6	7	7	7	7	7	7	7	6	7	6	2	2	1	2	1	2	2	1	1	3	1	1	2	1	1	1	1	1	1	0	0	3	3	1	2	1	1	4	4	4	2	4	4	4	3	4	2
	6	6	7	7	7	7	7	7	7	6	7	6	2	2	1	2	1	2	2	1	1	3	1	1	2	1	1	1	1	1	1	0	0	3	3	1	2	1	1	4	4	4	2	4	4	4	3	4	2
	1	1	6	6	1	1	1	6	1	1	6	1	1	1	0	1	0	1	1	0	0	0	4	4	3	3	3	4	1	2	1	1	0	0	0	1	0	0	0	0	0	0	0	0	0	0	0	0	0
	1	1	1	1	6	4	2	1	1	2	1	1	0	3	0	3	0	3	3	1	0	0	4	4	1	4	4	1	4	4	0	3	3	0	3	3	3	3	0	0	0	0	0	2	2	0	0	0	0
	1	1	2	2	1	2	2	6	4	6	6	6	2	2	2	2	1	2	2	1	2	3	1	2	3	1	1	3	1	1	0	0	2	1	1	0	0	0	0	0	0	0	0	0	0	0	0	0	0
	1	1	2	2	1	2	2	6	4	6	6	6	2	2	2	2	1	2	2	1	2	3	1	2	3	1	1	3	1	1	0	0	2	1	1	0	0	0	0	0	0	0	0	0	0	0	0	0	0
	6	6	6	6	6	6	4	6	6	6	6	6	2	2	3	2	2	2	2	2	3	3	1	1	4	1	1	1	1	1	0	0	0	0	0	0	2	0	0	0	0	0	0	0	0	0	0	0	0
	6	6	6	6	6	6	4	6	6	6	6	6	2	2	3	2	2	2	2	2	3	3	1	1	4	1	1	1	1	1	0	0	0	0	0	0	2	0	0	0	0	0	0	0	0	0	0	0	0
	4	4	4	4	4	4	4	4	4	4	4	4	2	3	0	3	0	3	3	0	0	0	2	2	3	2	2	3	2	2	0	0	0	0	0	0	0	0	0	2	2	2	2	2	2	2	2	2	2
	6	6	6	6	6	6	6	5	6	6	6	6	2	2	2	2	2	2	2	2	2	2	2	2	1	2	1	2	2	2	1	2	0	1	0	0	1	0	0	0	0	0	0	2	0	2	0	1	1
	2	2	2	2	2	2	2	2	2	3	2	2	2	2	3	2	2	2	2	1	3	3	3	3	1	3	4	2	3	3	1	1	1	1	1	1	1	1	1	0	0	0	0	0	0	0	0	0	0
	1	1	1	1	1	1	1	1	1	1	1	1	0	0	3	0	3	0	0	3	3	3	1	1	4	1	1	4	1	1	0	0	0	0	0	0	0	0	0	0	0	0	0	0	0	0	0	0	0
	6	6	6	6	6	6	6	6	6	6	6	6	0	2	1	2	1	2	2	1	1	3	1	1	1	1	1	1	1	1	0	0	0	0	0	0	0	0	0	0	0	0	0	0	0	0	0	0	0
	6	2	6	6	7	7	2	6	7	2	6	2	2	2	2	3	2	2	2	2	2	2	1	1	1	1	1	1	1	1	1	1	1	1	1	0	3	1	0	2	2	0	0	0	0	0	0	0	0
	4	4	6	6	4	4	6	6	4	4	6	4	2	2	2	2	1	2	2	1	2	2	2	3	2	1	1	2	3	1	0	0	1	1	1	0	0	0	0	1	0	0	1	1	1	0	1	0	0
	1	1	7	7	5	6	7	2	1	1	1	1	2	0	2	3	2	2	3	2	3	3	1	1	1	1	1	1	1	1	0	0	0	0	0	0	0	0	0	0	0	0	0	0	0	0	0	0	0
	6	6	7	6	6	6	6	6	7	6	6	6	2	3	2	1	1	2	2	1	2	3	1	1	1	1	3	1	3	2	0	0	0	0	0	0	0	0	0	1	0	1	1	0	1	0	2	3	0
	6	2	6	6	7	7	2	6	7	2	6	2	2	2	2	3	2	2	2	2	2	2	1	1	1	1	1	1	1	1	1	1	1	1	1	0	3	1	0	2	2	0	0	0	0	0	0	0	0
	7	7	7	7	7	7	7	7	7	7	7	7	3	3	2	3	2	3	3	2	2	3	1	1	1	1	1	1	1	1	0	0	1	0	0	0	0	0	0	0	0	0	0	0	0	0	0	0	0
	6	6	7	7	6	6	5	6	6	6	7	6	0	1	1	1	1	2	2	1	2	2	2	2	2	2	1	1	2	3	1	0	1	1	0	1	1	0	0	1	1	0	0	1	1	1	0	1	1
	4	5	4	4	5	4	4	5	4	5	5	5	1	2	2	2	1	1	1	1	1	2	2	3	4	2	2	2	2	3	2	1	2	2	0	2	1	1	1	2	2	0	2	2	3	2	2	1	1
	7	7	7	7	7	7	7	7	7	7	7	7	2	2	2	2	2	2	2	1	2	2	1	1	1	2	2	1	3	1	1	1	1	1	1	1	1	1	0	0	0	0	0	1	1	1	1	1	1
	6	6	6	6	6	6	6	6	4	7	6	6	2	2	2	3	2	2	2	0	3	3	1	1	1	1	1	1	1	3	0	0	1	0	0	0	0	0	0	0	0	0	0	0	0	0	0	0	0
	7	6	7	6	6	6	7	4	6	5	7	6	2	2	3	2	3	2	3	0	3	3	1	1	4	3	4	1	2	1	0	0	0	0	0	0	0	0	0	0	0	0	0	0	0	0	0	0	0
	6	4	6	6	6	6	6	6	4	7	6	2	2	2	2	3	2	2	2	0	3	3	1	1	1	1	1	1	1	3	0	0	0	0	0	0	0	0	0	0	0	0	0	0	0	0	0	0	0
	2	1	6	6	6	6	6	5	6	6	6	6	2	2	2	2	1	2	2	2	2	2	1	1	2	1	1	1	1	1	1	0	0	1	0	0	0	0	0	0	0	0	0	0	0	0	0	0	0
	6	6	6	6	6	6	5	5	5	5	5	5	2	2	3	2	2	2	2	2	2	3	1	2	2	1	1	1	3	2	0	0	0	0	1	0	0	0	0	0	0	0	0	1	0	0	0	0	0
	7	7	7	7	7	6	3	6	3	4	6	2	2	3	2	2	2	2	2	1	3	3	1	2	4	1	1	3	4	3	0	2	0	0	0	0	0	2	0	2	0	0	0	2	0	2	0	0	0
	5	6	6	7	6	5	6	5	4	5	6	4	1	1	1	2	1	2	2	1	1	1	4	4	4	3	3	1	4	2	0	1	3	1	0	1	0	0	0	2	1	0	0	0	0	0	1	0	0
	1	2	2	2	2	2	2	2	2	2	2	2	2	2	2	2	0	3	2	1	2	2	1	3	4	1	1	4	3	2	0	0	0	0	1	0	0	0	0	0	0	0	0	0	0	0	0	0	0
	6	6	6	6	6	6	6	6	6	6	6	6	2	2	2	3	2	3	3	2	1	3	1	1	1	1	1	1	1	1	0	0	1	1	1	0	0	0	0	0	0	0	0	1	0	0	0	0	0
	6	6	6	6	6	6	4	6	6	6	6	4	2	2	2	1	2	3	3	0	2	2	2	1	4	3	1	1	1	2	1	0	1	1	1	0	0	0	0	1	0	0	0	1	1	1	0	0	0
	6	6	6	6	6	6	6	6	6	6	6	6	2	2	1	2	1	2	2	1	1	1	1	1	1	1	1	1	1	1	0	0	3	0	3	0	2	0	0	0	0	0	0	0	0	0	3	0	0
	6	6	6	6	6	6	6	6	6	6	6	6	2	2	1	2	1	2	2	1	1	1	1	1	1	1	1	1	1	1	0	0	3	0	3	0	2	0	0	0	0	0	0	0	0	0	3	0	0
	2	2	6	6	2	6	4	6	4	4	6	4	2	2	2	2	2	2	2	1	1	2	3	2	2	3	3	3	1	1	1	1	1	1	1	1	0	0	0	0	0	0	0	1	1	1	1	1	0
	4	3	4	4	4	4	2	6	1	4	4	6	0	3	1	2	3	2	3	3	1	2	2	1	4	2	2	3	2	2	1	0	0	1	0	0	0	0	0	0	1	1	1	0	0	2	0	0	0
	5	5	5	5	5	5	5	5	5	5	5	5	2	2	2	2	2	2	2	2	2	3	1	1	1	1	1	1	1	1	3	3	1	1	1	0	0	0	0	3	2	2	3	3	2	1	1	1	2
	6	6	6	6	6	6	4	6	4	4	4	4	2	2	1	2	1	2	2	3	3	3	3	3	3	3	1	3	1	3	0	0	0	0	0	0	0	0	0	0	0	0	0	0	0	0	0	0	0
	4	3	7	7	3	4	4	7	4	4	7	1	2	2	2	2	2	2	2	2	2	2	3	2	2	2	2	2	2	2	0	0	0	0	0	0	0	0	1	1	1	0	0	1	0	1	0	0	1
	7	7	7	7	3	3	2	7	3	7	7	2	1	1	1	1	1	1	1	1	1	1	4	4	4	2	2	4	4	4	3	3	3	3	3	3	3	3	1	3	3	0	0	3	3	3	3	3	2
	4	6	6	6	3	3	6	6	6	4	6	6	3	3	3	3	0	3	2	3	1	3	1	1	3	1	1	1	1	1	0	0	0	1	0	0	0	0	0	0	0	0	0	3	0	0	0	0	0
	4	4	5	3	3	3	2	2	3	3	3	3	3	1	0	3	0	0	0	3	1	1	4	3	1	2	1	3	1	3	0	0	0	0	0	1	0	0	0	0	0	0	0	0	0	0	0	0	0
	1	1	7	7	1	1	1	7	1	1	7	1	3	3	3	3	3	3	3	3	3	3	4	1	1	1	1	4	1	1	0	0	1	0	0	0	0	0	0	0	0	0	0	1	0	0	2	0	0
	6	6	6	6	6	6	6	6	6	6	6	6	2	2	2	2	2	2	2	1	2	2	1	1	1	1	1	1	1	1	0	0	0	0	0	0	0	0	0	1	0	0	0	0	0	0	0	0	0
	1	1	1	1	1	1	1	1	1	1	1	1	0	0	0	0	0	3	3	1	3	0	1	4	4	1	1	4	1	1	0	0	0	0	0	0	0	0	0	0	0	0	0	0	0	0	0	0	0
	5	6	6	5	5	5	5	4	5	5	4	5	2	2	2	2	2	2	2	2	2	2	2	2	3	2	3	3	1	3	0	1	0	0	0	1	0	0	0	2	0	1	0	1	1	1	1	0	2
	5	6	6	5	5	5	5	4	5	5	4	5	2	2	2	2	2	2	2	2	2	2	2	2	3	2	3	3	1	3	0	1	0	0	0	1	0	0	0	2	0	1	0	1	1	1	1	0	2
	5	6	6	5	5	5	5	4	5	5	4	5	2	2	2	2	2	2	2	2	2	2	2	2	3	2	3	3	1	3	0	1	0	0	0	1	0	0	0	2	0	1	0	1	1	1	1	0	2
	4	2	6	7	2	6	3	4	2	2	7	1	3	3	1	2	2	3	2	2	1	1	2	1	4	1	1	4	3	1	0	2	3	3	0	1	1	0	0	2	0	1	0	0	0	0	0	0	0
	4	2	6	7	2	6	3	4	2	2	7	1	3	3	1	2	2	3	2	2	1	1	2	1	4	1	1	4	3	2	0	2	3	3	0	1	1	0	0	2	0	1	0	0	0	0	0	0	0
	5	6	6	6	6	6	5	6	6	6	6	6	2	2	2	2	2	2	2	1	1	2	2	2	2	2	2	1	2	2	1	1	1	1	1	1	1	1	0	0	1	1	0	1	1	0	1	1	0
	4	4	4	4	4	4	4	4	4	4	4	4	0	1	1	2	2	1	2	2	1	2	1	2	2	4	4	2	2	1	1	3	0	1	3	2	1	0	1	1	3	2	4	4	3	2	1	2	1
	5	5	6	6	6	6	5	6	6	6	6	6	2	2	2	2	2	2	2	2	2	2	2	2	2	2	2	1	2	2	1	1	1	1	1	1	1	1	0	1	1	1	1	1	1	1	1	1	1
	6	6	7	7	6	6	5	6	5	5	6	5	3	3	3	2	3	2	2	2	3	3	3	3	2	1	2	1	2	2	0	0	0	0	0	0	0	0	0	1	0	0	0	0	0	0	0	0	0
	6	6	6	6	6	6	6	6	6	6	6	6	2	2	2	2	2	2	2	2	2	2	1	1	2	1	1	1	1	1	0	0	0	0	0	0	0	0	0	0	0	0	0	1	0	2	1	0	0
	3	3	6	6	5	5	5	4	4	4	6	4	2	2	2	2	1	2	2	1	2	2	3	2	3	2	2	2	2	2	1	1	2	2	2	1	1	0	0	0	1	3	3	3	3	1	1	2	2
	7	6	4	6	7	6	6	6	6	6	6	6	1	3	2	3	1	3	2	1	0	3	1	2	1	2	2	1	2	2	1	2	2	2	1	3	3	3	2	4	3	3	3	4	4	4	4	4	4
	7	7	7	7	7	7	7	7	7	7	7	7	3	3	2	3	3	3	2	3	3	3	1	1	1	1	1	1	1	1	0	0	1	1	0	0	0	0	0	0	0	0	0	1	0	0	0	0	0
	7	7	7	7	7	7	7	7	7	7	7	7	2	2	3	3	3	3	3	3	3	3	1	1	3	1	1	1	1	1	0	0	0	1	0	0	0	0	0	0	0	0	0	0	0	0	0	0	0
	6	6	6	6	6	6	6	6	6	5	6	5	2	2	2	2	2	2	2	2	2	2	3	2	1	3	3	1	2	2	1	1	1	1	1	1	1	1	1	1	0	0	0	0	0	0	0	0	0
	6	6	4	6	6	6	6	3	6	6	3	6	2	2	1	2	1	2	2	2	1	1	1	1	2	3	3	1	3	2	1	1	1	2	1	1	1	1	1	1	2	0	3	3	2	3	1	3	1
	7	7	7	7	7	7	7	7	7	7	7	7	3	3	3	3	3	3	3	3	3	3	1	1	1	1	1	1	1	3	0	0	0	0	0	0	0	0	0	0	0	0	0	0	0	0	0	0	0
	6	6	6	6	6	6	6	6	6	6	6	6	2	2	2	1	1	2	2	1	1	1	1	1	1	1	1	1	1	1	0	0	0	0	0	0	0	1	0	0	0	0	0	0	0	0	0	0	0
	6	4	6	6	6	6	6	6	6	6	6	6	2	2	1	2	2	2	2	1	1	2	1	1	4	1	1	2	1	1	1	0	3	0	0	0	0	0	0	0	0	0	0	0	0	0	0	0	0
	6	6	7	6	6	6	6	6	6	6	6	4	2	2	2	2	2	2	2	2	2	2	1	2	2	1	1	1	2	1	0	0	0	0	0	0	0	0	0	0	0	0	0	0	0	0	0	0	0
	4	7	7	7	7	7	7	4	7	4	4	7	2	2	2	2	2	2	2	2	2	2	1	1	2	1	1	1	1	1	0	1	0	0	2	0	1	1	0	0	0	0	0	0	0	0	0	0	0
	4	7	7	7	7	7	7	4	7	4	4	7	2	2	2	2	2	2	2	2	2	2	1	1	2	1	1	1	1	1	0	1	0	0	2	0	1	1	0	0	0	0	0	0	0	0	0	0	0
	4	4	4	4	5	5	5	4	5	5	4	5	2	2	2	2	2	2	2	2	2	2	2	2	2	2	2	3	1	2	0	0	0	0	0	1	0	0	0	0	0	0	0	0	0	0	0	0	0
	7	7	7	7	7	7	7	5	5	5	5	5	2	2	2	2	1	2	2	1	1	1	3	3	2	3	3	2	3	2	1	1	1	1	1	1	1	1	0	2	2	0	1	2	2	2	2	2	2
	7	7	7	7	7	7	7	5	5	5	5	5	2	2	2	2	1	2	2	1	1	1	3	3	2	3	3	2	3	2	1	1	1	1	1	1	1	1	0	2	2	0	1	2	2	2	2	2	2
	7	7	7	7	7	7	7	7	7	7	7	7	0	0	3	3	3	3	3	3	3	3	1	1	2	1	1	1	1	1	0	0	0	0	0	0	0	0	0	0	0	0	0	0	0	0	0	0	0
	7	7	7	7	7	7	7	7	7	7	7	7	2	2	1	2	1	2	2	1	1	2	3	3	1	3	3	2	3	3	1	1	2	1	1	1	1	1	0	2	2	2	2	2	2	2	2	2	2
	4	2	5	5	5	5	5	5	5	5	5	5	2	2	2	3	2	2	2	1	1	2	3	3	1	1	1	1	1	2	0	0	0	0	1	1	0	2	1	1	1	1	0	2	1	1	1	1	0
	4	2	5	5	5	5	5	5	5	5	5	5	2	2	2	3	2	2	2	1	1	2	3	3	1	1	1	1	1	2	0	0	0	1	1	0	2	1	0	1	1	1	0	2	1	1	1	1	0
	1	2	1	1	1	2	2	1	2	1	2	2	0	0	3	0	3	0	0	3	3	3	2	2	3	1	1	3	2	2	0	1	1	1	0	1	0	1	0	1	0	1	0	1	0	1	1	1	0
	1	7	7	7	7	7	7	7	7	7	7	7	3	3	3	3	3	3	3	3	3	3	1	1	2	1	1	1	1	1	1	0	3	3	3	0	0	0	0	0	0	0	0	2	0	0	0	0	0
	1	1	1	1	1	1	5	6	6	6	6	6	3	3	3	3	3	2	3	0	3	3	2	2	1	1	1	2	1	1	0	0	0	0	0	0	0	0	0	0	0	0	0	0	0	0	0	0	0
	6	6	6	6	6	5	5	4	6	5	6	5	2	2	2	2	2	2	2	2	1	2	1	1	2	2	2	1	1	2	1	0	1	1	0	0	0	0	0	0	0	0	0	2	1	1	0	0	1
	7	7	1	1	7	7	3	1	5	5	5	5	2	2	2	1	1	2	1	1	1	1	4	2	2	3	3	1	3	3	2	2	2	1	2	2	2	1	1	2	2	0	2	2	2	3	1	2	2
	5	6	6	6	5	5	5	5	5	5	6	6	2	2	2	2	2	2	2	2	2	2	1	1	2	1	1	1	1	1	0	0	0	0	0	0	1	0	0	0	1	0	0	0	0	0	1	0	0
	6	6	6	6	6	6	6	6	6	6	6	6	1	2	2	1	1	2	2	1	2	2	1	1	3	1	1	1	3	1	0	1	0	0	1	1	0	0	0	0	0	0	0	0	0	0	0	0	0
	6	6	6	6	6	6	6	6	6	6	6	6	1	2	2	1	1	2	2	1	2	2	1	1	3	1	1	1	3	1	0	1	0	0	1	1	0	0	0	0	0	0	0	0	0	0	0	0	0
	7	7	7	7	7	7	6	6	7	6	7	7	3	3	3	3	3	3	3	3	3	3	1	1	2	1	1	1	1	1	1	0	0	0	0	0	0	0	0	0	0	1	0	0	0	0	0	0	0
	5	5	7	7	5	5	5	5	6	5	6	5	2	2	2	2	2	2	2	1	1	2	2	3	3	3	3	3	3	3	1	1	1	1	1	1	1	1	1	1	1	0	0	1	1	1	1	1	1
	7	7	7	7	7	7	7	7	7	7	7	7	3	3	2	3	2	3	3	0	2	2	1	1	1	1	1	1	1	1	0	0	1	1	1	0	0	1	0	0	0	0	0	0	0	0	0	0	0
	7	7	7	7	7	7	7	7	7	7	7	7	3	3	2	3	2	3	3	0	2	2	1	1	1	1	1	1	1	1	0	0	1	1	1	0	0	1	0	0	0	0	0	0	0	0	0	0	0
	5	6	7	7	7	7	7	5	7	7	7	7	2	2	3	2	3	2	2	3	3	3	1	1	1	1	1	1	1	1	0	0	0	0	0	0	0	0	0	0	0	0	0	0	0	0	0	0	0
	6	7	5	5	7	7	7	7	7	7	4	7	2	2	3	2	2	3	3	0	3	3	3	1	1	2	2	1	2	2	1	1	1	1	0	0	1	1	1	2	3	3	3	3	2	0	1	3	1
	6	6	6	6	6	6	6	6	6	6	6	6	2	2	3	3	3	2	3	3	3	3	1	1	2	1	1	1	1	1	0	0	1	1	1	0	0	0	0	0	0	0	0	0	0	0	0	0	0
	3	2	4	6	4	4	4	4	2	2	6	3	2	2	2	2	1	2	2	2	2	2	3	4	3	1	3	2	1	2	1	0	1	1	1	0	1	0	0	0	0	1	1	1	1	0	2	1	0
	7	7	7	7	7	7	6	3	7	6	5	4	3	3	3	3	3	3	3	3	3	3	3	3	1	3	3	2	1	3	0	1	1	0	1	0	1	1	0	1	1	1	0	0	1	1	1	1	1
	7	7	7	7	7	7	6	3	7	6	5	4	3	3	3	3	3	3	3	3	3	3	3	3	1	3	3	2	1	3	0	1	1	0	1	0	1	1	0	1	1	1	0	0	1	1	1	1	1
	6	6	6	6	6	6	6	6	6	6	6	6	3	3	2	3	2	2	2	2	2	2	1	1	3	2	2	1	2	1	1	0	1	1	0	0	0	0	0	0	0	0	0	0	0	0	0	0	0
	6	6	6	6	6	6	6	6	6	6	6	6	3	3	2	3	2	2	2	2	2	2	1	1	3	2	2	1	2	1	1	0	1	1	0	0	0	0	0	0	0	0	0	0	0	0	0	0	0
	7	7	7	7	7	7	7	7	7	7	7	7	2	2	3	2	2	2	2	3	3	3	1	1	2	1	1	1	1	2	0	0	1	1	0	0	0	0	0	0	0	0	0	0	0	0	0	0	0
	7	7	7	7	7	7	7	7	7	7	7	7	2	2	2	2	2	2	2	1	2	2	1	1	2	1	1	1	2	1	1	1	1	1	2	1	0	0	0	1	1	0	0	1	0	1	0	1	1
	7	7	7	7	7	7	7	7	7	7	7	7	2	2	3	2	2	2	2	3	3	3	1	1	2	1	1	1	1	2	0	0	1	1	0	0	0	0	0	0	0	0	0	0	0	0	0	0	0
	7	6	5	6	4	5	5	5	6	5	4	5	3	3	3	3	3	3	3	0	3	3	3	3	2	3	3	2	3	3	1	1	0	1	0	1	0	1	0	2	1	1	1	1	0	2	1	1	0
	4	4	6	6	4	6	4	6	4	4	4	6	2	2	2	2	2	2	2	2	2	2	1	1	2	1	1	2	1	1	1	0	0	2	0	0	0	0	0	0	0	0	1	1	1	0	0	0	0
	1	1	1	7	7	7	4	1	1	7	7	7	2	2	2	2	1	2	2	1	2	3	1	2	1	1	1	2	1	1	0	0	1	1	1	0	1	1	0	0	0	0	0	0	0	0	0	0	0
	4	4	4	4	4	4	4	4	4	4	4	4	2	2	2	2	2	2	2	1	2	2	2	2	2	1	1	1	1	1	0	0	0	0	0	0	0	0	0	0	0	0	0	0	0	0	0	0	0
	1	2	3	1	2	3	2	1	2	3	3	2	0	1	3	1	3	1	2	3	2	3	3	3	3	2	2	3	3	2	0	1	1	0	1	1	1	0	1	1	1	1	1	1	1	1	1	1	1
	3	3	4	6	2	3	2	4	3	2	4	2	2	2	2	2	1	1	1	1	1	1	4	3	3	3	3	3	3	3	3	3	3	2	1	2	2	2	0	2	2	2	3	3	2	2	3	1	3
	7	7	7	7	7	7	7	7	6	6	6	6	2	2	1	2	1	2	2	1	2	2	1	1	4	1	1	1	3	2	0	0	0	0	0	0	0	0	0	1	1	1	0	0	0	0	1	0	0
	4	5	7	6	7	5	4	3	7	6	7	5	2	2	2	2	1	2	2	1	2	2	2	3	1	3	3	2	3	3	1	1	1	1	1	1	1	1	1	1	1	0	1	3	1	1	2	1	0
	7	7	7	7	7	7	7	7	7	7	7	7	3	3	3	3	3	3	3	3	3	3	1	1	1	1	1	1	1	1	0	0	0	0	0	0	0	0	0	0	0	0	0	0	0	0	0	0	0
	6	6	7	7	7	6	5	4	4	4	5	6	2	2	2	2	2	1	2	2	2	2	2	3	1	2	2	3	2	3	0	1	0	1	1	0	0	1	1	0	0	0	0	0	0	0	0	0	0
	7	7	7	7	7	7	7	3	7	7	4	7	3	3	3	3	3	3	3	3	3	3	1	1	1	1	1	1	1	1	1	1	1	0	0	0	0	1	0	0	0	0	0	0	0	1	1	0	1
	7	6	6	6	6	6	7	6	6	6	6	6	2	2	2	2	2	2	2	1	2	3	1	1	4	1	1	4	1	1	0	1	1	1	0	0	1	1	0	1	1	1	0	1	1	2	1	1	1
	5	5	6	6	6	6	5	4	4	5	5	6	2	2	2	2	2	2	2	1	2	2	3	2	3	2	2	2	3	2	1	1	1	1	1	1	1	1	0	1	1	1	1	0	0	0	0	0	1
	7	7	7	7	7	7	7	7	7	7	7	7	2	2	2	2	2	2	2	1	2	3	1	1	2	1	1	1	1	1	1	0	0	1	1	0	0	0	0	0	0	0	0	0	0	0	0	0	0
	7	7	7	7	7	7	7	7	7	7	7	7	2	2	2	2	2	2	2	1	2	3	1	1	2	1	1	1	1	1	1	0	0	1	1	0	0	0	0	0	0	0	0	0	0	0	0	0	0
	6	6	7	7	6	6	6	7	7	7	7	7	3	3	3	3	3	3	2	3	3	3	1	1	1	1	1	1	1	1	0	0	0	0	1	0	0	0	0	0	0	0	0	0	1	0	0	0	0
	5	3	6	6	2	2	2	6	3	2	6	2	3	3	3	3	3	3	3	3	3	3	3	3	1	1	2	2	1	1	1	0	0	0	1	0	0	0	0	1	0	0	0	1	2	0	0	1	1
	5	3	6	6	2	2	2	6	3	2	6	2	3	3	3	3	3	3	3	3	3	3	3	3	1	1	2	2	1	1	1	0	0	0	1	0	0	0	0	1	0	0	0	1	2	0	0	1	1
	5	5	5	5	5	5	5	4	4	5	5	5	2	2	1	2	2	2	2	2	1	2	3	3	2	3	3	2	2	2	1	1	1	1	0	1	1	1	1	1	1	1	1	1	1	1	1	1	1
	5	5	6	6	4	4	5	6	6	6	6	6	2	2	1	2	1	2	1	2	2	3	2	2	1	2	1	1	1	1	1	0	2	2	3	0	0	0	0	0	0	0	0	0	0	0	0	1	0
	5	5	6	6	4	4	5	6	6	6	6	6	2	2	1	2	1	2	1	2	2	3	2	2	1	2	1	1	1	1	1	0	2	2	3	0	0	0	0	0	0	0	0	0	0	0	0	1	0
	7	7	7	7	7	7	7	5	5	7	6	7	2	2	3	2	2	2	2	1	2	2	1	2	1	2	2	1	2	2	1	1	1	1	1	1	1	1	0	2	1	2	3	3	3	3	2	3	1
	7	7	7	7	7	7	7	5	7	7	6	7	3	3	3	3	3	3	3	2	2	2	3	2	1	2	2	1	2	3	0	1	1	1	1	0	0	0	0	0	0	1	0	0	0	0	0	0	0
	7	7	7	7	7	7	7	7	7	7	7	7	3	3	3	3	3	2	2	0	2	3	3	2	2	2	2	2	1	2	0	1	3	1	1	0	1	1	0	1	1	0	2	0	0	0	1	3	1
	7	7	7	7	7	7	7	7	7	7	7	7	3	3	3	3	3	2	2	0	2	3	3	2	2	2	2	2	1	2	0	1	3	1	1	0	1	1	0	1	1	0	2	0	0	0	1	3	1
	7	7	7	7	7	7	7	7	7	7	7	7	2	2	2	2	1	1	1	3	1	2	1	1	2	1	1	1	3	1	1	1	0	1	0	0	0	0	0	2	0	0	0	2	2	1	2	1	0
	7	7	7	7	6	6	4	4	6	6	6	5	2	3	3	3	3	2	2	3	2	3	1	1	2	1	1	1	1	1	2	1	0	0	0	0	0	0	0	0	0	0	1	0	1	1	0	0	0
	4	4	6	6	4	6	4	6	4	4	4	6	2	2	2	2	2	2	2	2	2	2	1	1	2	1	1	2	1	1	1	0	0	2	0	0	0	0	0	0	0	0	1	1	1	0	0	0	0
	7	7	7	7	7	7	7	7	7	7	7	7	2	2	2	2	1	1	1	3	1	2	1	1	2	1	1	1	3	1	1	1	0	1	0	0	0	0	0	2	0	0	0	2	2	1	2	1	0
	5	6	5	5	6	5	5	5	6	6	5	6	2	2	2	2	2	2	2	1	1	2	2	2	2	3	3	2	3	3	2	1	1	1	1	1	1	1	1	0	0	0	0	0	0	1	2	1	0
	6	6	6	6	6	6	6	6	6	6	6	6	1	1	2	2	2	1	2	2	1	2	1	1	3	1	1	4	1	1	1	1	1	1	1	1	0	1	0	1	1	0	1	1	1	1	0	1	0
	6	6	6	6	6	6	6	6	6	6	6	6	2	2	2	2	2	2	2	2	2	2	1	1	1	1	1	1	2	2	1	1	1	1	1	0	0	0	0	1	0	0	0	0	0	0	0	0	0
	6	6	6	5	6	6	6	6	7	6	5	6	3	3	2	2	2	3	3	1	2	2	3	2	2	1	2	1	2	2	1	0	1	2	2	1	1	1	0	1	1	0	1	2	1	1	2	1	1
	7	7	7	7	7	7	7	7	7	7	7	7	2	2	2	1	2	3	3	2	1	2	1	1	1	3	3	1	2	1	1	1	2	1	1	1	1	1	0	1	1	2	2	1	1	1	3	2	2
	6	6	6	6	6	6	6	6	6	6	6	6	3	0	1	0	1	2	1	3	3	3	2	3	3	2	3	3	2	2	1	1	1	1	1	1	1	1	1	2	2	1	1	2	0	2	3	3	2
	6	6	7	7	7	7	7	7	7	7	7	7	2	2	2	2	1	2	2	1	2	2	2	2	2	2	2	1	2	2	1	1	1	1	1	1	1	1	0	1	1	0	1	1	0	1	0	0	0
	6	6	7	7	7	7	7	7	7	7	7	7	2	2	2	2	1	2	2	1	2	2	2	2	2	2	2	1	2	2	1	1	1	1	1	1	1	1	0	1	1	0	1	1	0	1	0	0	0
	6	6	6	6	6	6	6	6	6	6	6	6	2	2	2	2	2	2	2	2	2	2	2	2	2	2	2	1	1	1	1	1	1	1	0	0	0	0	0	1	1	0	0	0	0	0	1	0	1
	6	6	7	7	6	6	6	7	6	6	7	6	2	2	3	2	3	3	3	2	3	3	1	1	2	1	1	1	3	1	1	1	1	1	0	0	1	1	0	1	1	0	0	1	0	0	1	0	1
	7	7	7	7	7	7	7	7	7	7	7	7	3	3	3	3	3	3	3	3	3	3	1	1	2	1	1	1	1	1	0	0	0	0	0	0	0	0	0	0	0	0	0	0	0	0	0	0	0
	7	7	7	4	6	6	4	3	6	6	6	7	2	2	2	2	2	3	3	2	2	3	2	1	3	1	1	1	2	1	1	1	1	1	2	1	0	1	0	0	1	0	1	2	3	0	3	3	3
	7	7	7	7	7	7	7	7	7	7	7	7	3	3	3	3	3	3	3	3	3	3	1	1	2	1	2	1	1	1	1	0	0	0	1	0	0	0	0	0	0	0	0	1	0	0	0	1	0
	7	7	7	7	7	7	7	7	7	7	7	7	3	3	3	3	3	3	3	3	3	3	1	1	2	1	2	1	1	1	1	0	0	0	1	0	0	0	0	0	0	0	0	1	0	0	0	1	0
	7	7	6	6	7	6	6	6	6	6	6	6	3	3	3	3	3	3	3	3	3	3	1	1	1	1	1	1	1	2	1	1	0	0	1	0	0	0	0	1	1	0	0	0	0	0	1	1	0
	6	6	6	7	6	6	6	6	6	6	6	6	2	2	2	2	2	2	2	1	2	2	3	3	2	2	2	2	1	2	1	0	1	1	0	0	0	0	0	1	0	0	1	2	1	1	2	1	1
	7	7	1	1	7	3	4	5	5	5	5	5	2	2	2	1	1	2	1	1	1	1	4	2	2	3	3	1	3	3	2	2	2	1	2	2	2	1	1	2	2	0	2	2	2	3	1	2	2
	6	6	6	4	6	4	3	6	5	6	6	6	1	2	1	1	1	2	1	1	1	1	3	2	2	1	1	1	1	3	1	0	1	0	1	2	2	2	0	1	0	0	0	2	2	0	0	0	0
	7	7	7	7	7	7	7	7	7	7	7	7	3	3	3	3	3	3	3	3	3	3	1	1	2	1	1	1	1	1	0	0	0	0	0	0	0	0	0	0	0	0	0	0	0	0	0	0	0
	7	7	7	7	7	7	6	7	7	7	7	7	2	2	2	2	1	2	2	1	1	2	1	2	1	1	1	1	1	2	0	0	0	0	0	0	0	0	0	2	0	0	0	0	0	0	0	0	0
	7	7	7	7	7	7	7	7	7	7	7	7	2	1	1	1	1	2	1	2	2	2	1	2	3	2	1	2	2	2	1	0	1	1	1	1	0	0	0	1	1	0	1	0	0	0	0	0	0
	2	2	2	3	3	4	4	4	4	3	3	3	2	2	1	2	1	2	2	1	1	1	2	2	3	1	1	4	1	1	1	1	1	1	1	0	0	0	0	1	1	1	1	1	2	2	2	2	2
	6	6	6	6	6	6	4	6	6	6	6	6	2	2	2	2	2	2	2	2	2	2	2	3	1	2	2	1	2	2	1	1	1	1	1	0	0	0	0	0	0	0	0	0	0	0	0	0	0
	6	6	6	6	6	5	2	3	6	5	3	6	2	2	3	3	3	2	2	2	3	3	1	2	1	2	2	1	2	1	0	0	0	0	0	0	0	0	0	0	0	0	0	0	0	0	0	0	0
	6	6	6	6	6	6	6	6	6	6	6	6	3	3	2	3	2	3	3	2	2	2	1	1	4	1	1	4	1	1	1	1	1	1	1	0	0	1	0	0	0	0	0	0	0	0	0	0	0
	4	4	4	4	5	5	5	4	5	5	5	4	2	2	2	2	1	2	2	1	2	2	3	3	2	2	2	2	2	2	1	1	2	1	1	1	1	1	0	1	1	0	1	1	1	1	1	1	1
	4	5	4	4	4	5	4	4	4	4	6	4	1	2	3	2	1	2	2	2	1	3	1	1	4	1	1	1	3	1	1	0	1	1	1	0	1	1	1	0	0	0	0	0	2	2	2	2	0
	7	6	6	6	6	6	6	6	6	6	6	6	2	2	2	2	1	2	2	1	1	1	3	3	2	3	3	2	3	3	1	1	1	1	1	1	1	0	0	0	0	0	0	0	0	0	0	0	0
	6	6	6	6	6	6	4	6	6	6	6	6	2	2	2	2	2	2	2	2	2	2	2	3	1	2	2	1	2	2	1	1	1	1	1	0	0	0	0	0	0	0	0	0	0	0	0	0	0
	7	7	7	7	7	7	7	7	7	7	7	7	3	3	3	3	3	3	3	3	3	3	2	1	2	1	1	1	1	1	0	0	0	2	0	0	0	0	0	0	0	0	0	0	0	0	0	0	0
	6	6	7	7	7	7	7	4	7	7	6	6	3	3	3	3	3	3	3	3	3	3	1	1	1	1	1	1	1	2	1	0	1	1	0	0	0	0	0	0	0	0	0	0	0	0	0	0	0
	7	7	7	7	7	7	7	7	3	6	7	6	2	1	1	2	1	2	2	1	2	2	3	2	2	1	3	1	1	1	1	1	0	0	0	0	0	0	0	2	1	0	1	1	0	1	0	0	0
	6	6	6	6	6	6	6	6	6	6	6	6	1	2	1	2	1	2	2	1	1	2	2	2	2	2	1	1	1	2	0	0	1	0	0	1	0	1	0	0	0	2	0	1	3	2	0	0	0
	6	7	7	7	7	7	7	7	7	7	7	7	1	2	1	2	1	2	2	0	1	1	1	1	1	1	1	1	3	1	1	0	2	1	3	0	0	1	0	1	0	0	0	0	0	0	0	0	0
	5	6	6	6	5	5	5	5	5	5	6	6	2	2	2	2	2	2	2	2	2	2	1	1	2	1	1	1	1	1	0	0	0	0	0	0	1	0	0	0	1	0	0	0	0	0	1	0	0
	7	7	6	6	6	6	6	6	7	7	6	6	2	2	3	2	2	2	2	1	3	2	3	3	1	2	3	1	1	2	1	1	1	2	1	0	1	1	0	1	1	1	0	0	0	1	1	1	0
	7	7	7	7	7	7	7	7	7	7	7	7	3	3	2	2	2	3	2	1	2	2	2	2	1	1	1	1	1	1	0	0	0	0	0	1	1	0	1	0	0	0	0	1	0	1	1	1	1
	6	6	5	5	6	6	6	4	6	6	5	6	2	2	2	2	2	2	2	1	1	2	2	2	2	3	2	1	3	2	1	1	1	2	0	1	0	1	0	1	1	0	1	2	2	1	2	2	2
	6	6	5	5	6	6	6	4	6	6	5	6	2	2	2	2	2	2	2	1	1	2	2	2	2	3	2	1	3	2	1	1	1	2	0	1	0	1	0	1	1	0	1	2	2	1	2	2	2
	7	7	5	3	4	6	3	2	7	7	3	4	2	2	1	2	1	2	2	1	2	2	1	1	2	1	1	1	2	3	2	2	2	2	0	1	0	0	0	1	1	3	3	3	3	3	2	2	0
	7	7	5	3	4	6	3	2	7	7	3	4	2	2	1	2	1	2	2	1	2	2	1	1	2	1	1	1	2	3	2	2	2	2	0	1	0	0	0	1	1	3	3	3	3	3	2	2	0
	7	7	7	7	7	7	7	7	7	7	7	7	3	3	3	3	3	3	3	3	3	3	2	1	2	1	1	1	1	1	0	0	0	2	0	0	0	0	0	0	0	0	0	0	0	0	0	0	0
	6	6	7	7	7	7	7	7	4	7	6	6	3	3	3	3	3	3	3	3	3	3	1	1	1	1	1	1	1	2	1	0	1	1	0	0	0	0	0	0	0	0	0	0	0	0	0	0	0
	7	7	7	7	7	7	7	7	7	7	7	7	2	2	1	2	1	2	2	1	1	1	3	3	2	3	3	2	3	3	1	1	1	1	1	1	1	1	0	1	1	0	0	0	0	0	1	0	0
	5	3	6	6	6	6	6	5	5	5	5	5	2	2	2	2	1	2	2	2	1	2	3	3	1	1	2	1	3	3	1	0	1	0	0	0	1	0	0	0	0	0	0	1	1	1	1	0	1
	5	5	6	6	6	6	5	6	5	5	5	5	2	2	1	2	1	2	2	1	1	2	1	1	3	3	3	2	3	3	1	1	1	1	1	1	1	1	1	1	1	0	1	1	1	1	1	1	2
	5	5	6	6	6	6	5	6	5	5	5	5	2	2	1	2	1	2	2	1	1	2	1	1	3	3	3	2	3	3	1	1	1	1	1	1	1	1	1	1	1	0	1	1	1	1	1	1	2
	2	4	6	6	3	2	1	5	4	3	5	3	2	2	2	2	2	1	2	2	2	2	3	3	3	3	3	2	2	3	1	1	0	1	0	0	0	1	0	1	1	1	1	1	1	1	1	1	1
	4	5	4	4	4	5	4	4	4	4	6	4	1	2	3	2	1	2	2	2	1	3	1	1	4	1	1	1	3	1	1	0	1	1	1	0	1	1	1	0	0	0	0	0	2	2	2	2	0
	7	7	7	7	7	7	7	7	7	7	7	7	0	0	0	0	0	3	3	2	3	3	1	1	1	1	1	1	1	4	0	0	0	0	0	0	0	0	0	0	0	0	0	0	0	0	0	0	0
	7	7	7	7	7	7	7	7	7	7	7	7	3	3	2	2	2	2	3	2	2	2	1	1	1	1	1	1	1	1	1	1	0	1	0	0	0	0	0	0	0	1	0	0	0	0	0	0	0
	6	6	7	7	7	7	7	7	7	7	7	7	2	2	3	2	2	2	2	2	3	3	1	2	1	1	1	1	1	1	0	0	0	0	0	0	0	0	0	0	0	0	0	0	0	0	0	0	0
	7	7	7	7	7	7	7	7	7	7	7	7	2	1	1	1	1	2	1	2	2	2	1	2	3	2	1	2	2	2	1	0	1	1	1	1	0	0	0	1	1	0	1	0	0	0	0	0	0
	7	7	6	4	7	7	7	3	7	7	4	7	1	1	0	0	0	0	0	0	0	0	3	1	2	4	4	1	3	1	3	3	3	3	1	2	3	3	3	2	3	0	4	3	2	4	4	4	3
	7	6	7	7	7	7	7	7	7	7	7	7	3	3	3	2	1	2	2	1	3	3	1	1	1	1	1	1	1	1	1	0	0	0	0	0	0	0	0	0	0	0	0	0	0	0	0	0	0
	7	7	7	7	7	7	7	7	7	7	7	7	3	3	3	3	2	2	2	3	3	3	1	1	1	1	1	1	1	1	0	0	1	0	0	0	1	0	0	0	0	0	0	0	0	0	0	0	0
	4	4	7	7	4	4	4	7	4	4	7	4	2	2	2	2	1	1	2	1	1	2	3	1	2	2	2	2	3	3	1	1	1	1	1	1	1	1	1	2	1	1	1	1	1	1	1	2	1
	6	6	6	6	6	6	4	6	5	4	7	5	2	3	2	3	2	2	3	2	2	3	2	3	1	1	1	2	1	1	0	0	2	0	0	0	0	0	0	0	1	0	1	1	0	0	1	0	0
	5	6	6	5	6	6	6	6	6	6	6	6	2	2	2	2	2	2	2	1	2	3	1	2	1	2	2	1	2	2	0	0	0	0	0	0	0	0	0	0	1	0	1	1	1	0	1	1	2
	7	7	7	7	5	7	7	7	7	7	7	7	3	3	2	3	3	3	2	2	2	3	2	1	1	1	2	1	1	2	1	0	1	1	0	0	2	0	0	1	2	3	0	0	2	2	1	1	1
	6	6	6	6	6	6	6	6	6	6	6	6	3	3	3	3	3	3	3	3	3	3	1	1	1	1	1	2	1	2	0	0	0	0	0	0	0	0	0	0	0	0	0	0	0	0	0	0	0
	3	3	4	5	4	4	3	5	5	5	5	4	3	3	2	3	2	2	2	2	3	3	2	2	2	1	1	2	1	2	1	0	1	1	2	0	0	0	0	0	0	0	0	1	1	0	1	0	1
	3	3	4	5	4	4	3	5	5	5	5	4	3	3	2	3	2	2	2	2	3	3	2	2	2	1	1	2	1	2	1	0	1	1	2	0	0	0	0	0	0	0	1	1	1	0	1	0	1
	7	7	7	7	7	7	7	5	7	7	7	7	3	3	3	3	3	3	2	1	3	3	1	1	1	1	1	1	2	2	0	0	0	1	1	0	0	0	0	0	0	0	0	0	0	0	0	0	0
	7	7	7	7	7	7	7	7	7	7	7	7	2	2	2	2	2	1	1	1	1	2	2	2	2	2	3	1	3	4	1	1	1	1	2	1	1	1	0	1	1	2	2	2	2	1	2	2	1
	1	1	2	2	2	2	2	2	2	2	2	2	0	0	1	1	2	1	1	2	2	2	4	4	4	4	4	4	4	4	3	3	3	3	1	3	3	3	3	3	3	3	3	3	3	4	3	3	3
	5	5	6	6	6	6	5	4	5	5	5	5	2	2	2	2	2	2	2	1	2	2	2	2	2	2	2	2	2	2	1	1	0	1	0	0	1	1	0	2	2	0	2	2	0	1	0	1	0
	5	5	6	6	6	6	5	4	5	5	5	5	2	2	2	2	2	2	2	1	2	2	2	2	2	2	2	2	2	2	1	1	0	1	0	0	1	1	0	2	2	0	2	2	0	1	0	1	0
	7	7	7	7	7	7	7	7	7	7	7	7	3	3	3	3	3	3	3	3	3	3	4	3	2	2	1	2	2	2	1	0	1	1	1	0	0	0	0	0	0	0	0	1	0	0	1	0	0
	7	7	7	7	7	7	7	7	7	7	7	7	3	3	3	3	3	3	3	3	3	3	4	3	2	2	1	2	2	2	1	0	1	1	1	0	0	0	0	0	0	0	0	1	0	0	1	0	0
	5	5	4	4	5	5	5	4	5	5	5	5	1	2	1	1	1	1	1	1	1	1	3	3	3	4	4	2	4	4	3	3	3	3	2	3	3	3	3	3	3	3	3	3	3	3	3	3	3
	7	7	7	4	7	7	5	3	6	7	6	7	2	2	0	0	2	2	3	1	2	2	2	1	2	2	3	1	1	1	1	1	0	2	0	1	0	0	0	2	1	0	1	2	1	0	2	3	1
	7	7	7	7	7	7	7	1	7	7	4	7	3	3	2	3	3	3	3	0	3	3	1	1	1	1	1	1	3	1	2	0	3	2	0	0	0	0	0	0	0	0	0	2	0	0	4	0	0
	4	4	7	7	4	4	4	7	4	4	7	4	2	2	2	2	1	1	2	1	1	2	3	1	2	2	2	2	3	3	1	1	1	1	1	1	1	1	1	3	2	2	2	2	2	2	2	3	2
	7	7	7	7	7	7	7	7	7	7	7	7	3	3	0	3	0	3	3	0	0	0	1	1	1	1	1	1	4	1	0	0	0	0	0	0	0	0	0	0	0	0	0	0	0	0	0	0	0
	7	7	7	7	7	7	7	7	7	7	7	7	2	2	1	2	1	2	2	1	1	1	3	3	2	3	3	2	3	3	1	1	1	1	1	1	1	1	0	1	1	0	0	0	0	0	1	0	0
	6	6	6	6	6	6	6	6	6	6	6	6	2	2	2	2	2	2	2	2	2	2	1	1	1	1	1	1	1	1	1	0	1	1	1	0	1	1	0	0	0	0	0	0	0	0	0	0	0
	6	6	6	6	6	6	6	6	6	6	6	6	2	2	2	2	2	2	2	2	2	2	1	1	1	1	1	1	1	1	1	0	1	1	1	0	1	1	0	0	0	0	0	0	0	0	0	0	0
	7	7	7	7	7	7	7	7	7	7	7	7	3	3	3	3	3	3	3	3	3	3	1	1	1	1	1	1	1	1	0	0	0	0	0	0	0	0	0	0	0	0	0	0	0	0	0	0	0
	7	7	7	7	7	7	7	7	7	7	7	7	3	3	3	3	3	3	3	3	3	3	1	1	1	1	1	1	1	1	0	0	0	0	0	0	0	0	0	0	0	0	0	0	0	0	0	0	0
	6	6	7	6	6	6	5	4	5	6	6	6	2	2	1	2	2	2	1	1	2	2	3	2	1	2	2	1	1	2	1	0	1	2	1	0	0	2	0	0	0	0	0	2	1	0	2	0	1
	6	6	6	6	6	6	6	6	6	6	6	6	2	2	2	2	2	2	2	1	2	3	1	1	2	1	1	1	3	2	1	1	2	2	1	0	1	1	1	1	1	2	1	3	2	3	3	3	1
	7	7	7	6	7	7	7	6	7	7	7	7	3	3	3	3	3	3	3	1	2	3	2	1	1	1	1	1	3	2	1	0	2	1	1	0	2	0	0	1	0	0	0	2	1	1	3	1	3
	5	5	5	5	5	5	5	5	5	5	5	5	2	2	2	2	1	2	2	1	2	3	3	2	3	1	1	1	1	1	1	1	1	1	1	1	0	0	0	1	1	2	1	2	2	1	0	1	2
	2	4	4	4	4	4	4	4	4	4	3	4	3	3	2	2	2	3	3	2	2	3	3	2	2	3	4	1	1	2	0	0	1	1	1	0	0	0	0	0	0	0	0	0	1	1	2	2	0
	7	6	7	7	7	7	7	7	7	7	7	7	3	3	3	2	1	2	2	1	3	3	1	1	1	1	1	1	1	1	1	0	0	0	0	0	0	0	0	0	0	0	0	0	0	0	0	0	0
	6	6	6	6	6	6	6	6	6	6	6	6	2	2	2	2	2	2	2	2	2	2	1	1	2	1	1	2	1	1	0	0	0	0	0	0	0	0	0	0	0	0	0	0	0	0	0	0	0
	1	1	1	1	1	1	1	1	1	1	1	1	3	3	3	3	3	3	3	2	2	3	2	1	1	1	1	1	2	1	0	0	1	1	1	0	0	0	0	0	0	0	0	0	0	0	0	0	0
	6	6	6	6	6	6	6	6	6	6	6	6	3	3	3	2	3	3	3	1	3	3	1	1	1	1	1	1	1	1	1	1	1	1	0	1	0	0	0	2	1	0	1	2	1	1	2	1	1
	1	1	1	1	1	1	1	1	1	1	1	1	3	3	3	3	3	3	3	2	2	3	2	1	1	1	1	1	2	1	0	0	1	1	1	0	0	0	0	0	0	0	0	0	0	0	0	0	0
	7	7	7	7	7	7	7	7	7	7	7	7	3	3	3	3	3	3	3	0	3	3	1	1	1	1	1	4	4	1	0	0	1	0	0	0	1	0	0	0	0	0	0	0	0	0	0	0	0
	7	7	7	7	7	7	7	7	7	7	7	7	3	3	2	2	2	2	2	1	2	2	2	2	2	1	1	2	1	1	0	0	0	0	0	1	1	0	1	0	0	0	0	1	0	1	1	1	1
	4	3	4	6	6	6	6	6	5	5	5	4	2	2	2	2	2	2	2	1	2	2	1	2	2	1	1	2	2	1	0	0	0	1	1	1	1	1	1	0	0	0	0	0	0	0	0	0	0
	4	4	6	6	6	6	6	6	6	6	6	6	2	2	2	2	1	2	2	1	1	2	3	3	2	2	2	1	2	2	1	1	1	1	1	1	1	1	0	1	1	0	1	2	2	2	2	2	2
	4	4	6	6	6	6	6	6	6	6	6	6	2	2	2	2	1	2	2	1	1	2	3	3	2	2	2	1	2	2	1	1	1	1	1	1	1	1	0	1	1	0	1	2	2	2	2	2	2
	7	7	5	5	5	7	7	4	7	7	5	7	3	3	3	3	3	3	3	3	1	3	3	1	3	2	2	2	2	2	3	1	1	3	0	0	2	0	0	1	1	0	2	2	2	0	2	1	0
	5	5	6	6	6	6	5	6	6	6	5	5	2	2	2	2	2	2	2	2	2	2	3	2	2	2	2	1	2	3	1	1	1	1	1	1	1	1	0	3	3	3	3	3	3	3	2	3	2
	7	7	7	7	7	7	7	7	7	7	7	7	3	3	3	3	3	3	3	0	3	3	1	1	1	1	1	1	1	1	0	0	2	0	0	0	0	0	0	0	0	0	0	0	0	0	0	0	0
	5	5	5	5	5	5	5	5	5	5	4	5	3	3	3	2	2	2	2	2	2	2	3	2	2	1	2	2	1	1	0	0	1	0	1	0	0	0	0	0	0	0	0	2	2	0	0	0	0
	6	6	6	6	6	6	6	5	6	6	6	6	2	2	2	2	2	2	2	1	2	2	1	1	2	1	1	1	1	1	2	2	1	1	0	1	0	0	0	3	0	0	0	3	0	1	0	1	0
	6	6	6	6	6	6	6	5	6	6	6	6	2	2	2	2	2	2	2	1	2	2	1	1	2	1	1	1	1	1	2	2	1	1	0	1	0	0	0	3	0	0	0	3	0	1	0	1	0
	4	3	4	6	6	6	6	6	5	5	5	4	2	2	2	2	2	2	2	1	2	2	1	2	2	1	1	2	2	1	0	0	0	1	1	1	1	1	1	1	1	0	1	1	1	1	1	1	1
	6	6	7	7	7	7	7	7	7	7	7	7	3	3	2	2	2	2	2	2	2	3	1	1	2	1	1	1	2	1	0	0	1	1	0	0	0	0	0	0	0	0	0	0	0	0	0	0	0
	4	6	6	6	5	6	5	6	5	4	5	6	2	2	2	2	2	2	2	2	2	3	2	1	1	1	1	1	1	1	0	0	0	0	0	0	0	0	0	0	0	0	0	0	0	0	0	0	0
	6	6	6	6	6	6	6	6	6	6	6	6	2	2	2	2	2	2	2	2	1	2	2	2	2	2	2	2	2	2	0	0	0	0	0	0	0	0	0	2	2	0	2	2	2	0	1	2	0
	6	6	6	6	6	6	6	6	6	6	6	6	2	2	2	2	1	1	1	1	1	2	3	2	3	2	2	1	3	2	1	1	2	1	1	1	1	1	1	1	1	1	0	0	0	0	2	0	1
	4	5	2	3	4	3	4	5	3	4	3	6	2	2	2	1	0	3	3	0	0	3	3	3	3	1	2	1	3	2	2	0	3	2	1	1	1	1	0	1	1	2	2	2	2	2	2	3	1
	6	6	6	6	6	6	6	6	6	6	6	6	2	2	1	2	1	2	2	1	1	1	1	1	1	1	1	1	1	1	1	0	1	1	1	0	1	0	0	1	1	1	1	1	1	1	1	1	1
	5	5	5	5	5	4	5	3	5	4	5	5	2	2	2	2	2	2	2	2	2	3	1	2	1	1	1	1	1	2	0	0	0	0	0	0	0	0	0	0	0	0	0	0	0	0	0	0	0
	6	6	6	6	6	6	6	6	6	6	6	6	2	2	2	2	1	2	2	1	2	2	1	1	4	1	1	4	1	2	1	0	1	1	0	0	0	0	0	0	0	0	0	0	0	0	0	0	0
	6	6	6	6	6	6	6	6	6	6	6	6	3	3	3	3	3	3	3	3	3	3	1	1	1	1	1	1	1	1	0	0	0	0	0	0	0	0	0	0	0	0	0	0	0	0	0	0	0
	4	4	4	4	4	4	4	4	4	4	4	4	2	2	2	2	2	2	2	2	2	2	1	1	4	1	1	2	1	1	0	0	0	1	1	0	0	1	0	0	0	0	0	0	0	0	0	0	0
	6	6	6	4	4	6	6	6	6	6	6	6	2	2	2	2	2	2	2	1	1	2	3	3	2	2	2	1	3	4	0	0	0	2	0	0	1	1	0	0	0	0	0	0	0	1	0	0	0
	6	6	6	4	4	6	6	6	6	6	6	6	2	2	2	2	2	2	2	1	1	2	3	3	2	2	2	1	3	4	0	0	0	2	0	0	1	1	0	0	0	0	0	0	0	1	0	0	0
	7	7	7	7	7	7	7	6	6	6	6	6	2	2	2	2	2	2	3	3	3	3	3	2	2	2	1	1	1	1	2	2	3	3	2	0	0	1	0	0	1	0	2	2	1	1	1	2	0
	6	6	6	6	6	6	4	6	6	6	6	6	3	3	3	2	2	2	2	3	3	3	1	3	1	3	3	2	1	3	1	1	2	2	2	0	1	1	0	1	1	1	1	1	1	1	1	0	0
	6	5	6	6	6	6	6	5	6	6	5	6	2	2	2	2	1	2	1	1	1	2	3	3	4	1	1	3	2	2	0	1	0	0	0	0	0	1	0	0	1	1	1	1	1	1	1	1	1
	7	7	7	7	7	7	7	7	7	7	7	7	3	3	3	3	1	2	2	1	2	3	1	1	4	1	1	1	1	1	0	0	0	0	0	0	0	0	0	0	0	0	0	0	0	0	0	0	0
	7	7	7	7	7	7	7	7	7	7	7	7	2	2	2	2	2	2	2	1	2	2	1	1	2	1	1	1	2	1	1	1	1	1	2	1	0	0	0	1	1	0	0	1	0	1	0	1	1
	5	6	5	6	6	5	5	4	4	5	4	4	3	3	3	3	3	3	3	2	2	2	3	3	3	2	1	2	2	3	0	0	1	1	0	0	0	0	0	0	0	0	0	0	0	0	0	0	0
	4	5	6	6	5	5	5	7	5	5	7	5	2	2	2	2	1	2	2	2	2	2	3	2	3	1	1	2	1	1	1	0	0	0	0	0	0	0	0	0	0	0	0	0	0	0	0	0	0
	4	6	7	7	7	7	7	7	7	7	7	7	3	3	3	2	2	2	2	3	3	3	1	3	1	3	3	2	1	3	1	1	2	2	2	0	1	1	0	1	1	1	1	1	1	1	1	0	0
	6	6	6	6	6	6	4	6	6	6	6	6	2	2	2	2	1	2	1	1	1	2	2	2	2	2	2	2	2	2	1	1	0	1	1	0	0	0	0	1	1	0	0	2	1	1	1	1	1
	7	7	7	7	7	7	7	7	7	7	7	7	3	3	0	3	0	3	3	0	0	0	3	3	2	3	3	2	3	3	1	1	0	0	0	0	0	0	0	0	0	0	0	0	0	0	0	0	0
	6	6	6	6	6	6	4	6	6	6	6	6	3	3	3	2	2	2	2	3	3	3	1	3	1	3	3	2	1	3	1	1	2	2	2	0	1	1	0	1	1	1	1	1	1	1	1	0	0
	6	6	6	6	6	6	6	4	6	6	6	6	2	3	2	3	2	2	2	1	2	3	3	3	2	2	2	1	2	2	1	1	1	1	1	1	1	1	1	2	1	1	1	2	1	0	3	1	1
	4	4	4	4	4	4	4	4	4	4	4	4	2	2	1	2	1	2	2	1	1	1	2	2	3	2	2	3	2	2	0	0	0	0	0	0	0	0	0	0	0	0	0	0	0	0	0	0	0
	5	5	7	7	5	5	4	7	5	4	6	5	2	2	2	2	2	2	2	2	2	2	3	3	3	1	1	2	3	2	1	1	1	1	1	1	1	1	0	2	2	0	2	2	1	1	1	2	0
	6	6	7	6	6	6	6	5	6	6	6	6	2	2	3	2	3	3	3	1	3	3	1	1	2	1	1	1	1	1	0	0	0	1	0	0	0	0	0	0	0	0	0	0	0	0	3	0	0
	6	6	6	6	6	6	6	6	6	6	6	6	2	3	1	3	2	2	2	1	2	2	2	1	2	2	2	1	3	2	1	1	0	1	1	1	0	1	1	1	1	0	1	1	1	1	1	1	0
	6	6	6	6	6	6	6	6	6	6	6	6	2	3	1	3	2	2	2	1	2	2	2	1	2	2	2	1	3	2	1	1	0	1	1	1	0	1	1	1	1	0	1	1	1	1	1	1	0
	6	6	7	6	6	6	6	5	6	6	6	6	2	2	3	2	3	3	3	1	3	3	1	1	2	1	1	1	1	1	0	0	0	1	1	0	0	0	0	0	0	0	0	0	0	0	3	0	0
	4	5	6	6	4	4	3	6	6	6	6	4	2	2	2	2	2	2	2	3	3	3	2	2	2	2	2	2	2	1	1	1	1	1	0	0	0	0	0	0	0	0	0	0	0	0	0	0	0
	4	4	4	4	4	4	4	4	4	4	4	4	2	2	2	2	2	2	2	2	2	2	1	1	4	1	1	2	1	1	0	0	0	1	1	0	0	1	0	0	0	0	0	0	0	0	0	0	0
	7	7	7	7	7	7	7	7	7	7	7	7	3	3	0	3	0	3	3	0	0	0	3	3	2	3	3	2	3	3	1	1	0	0	0	0	0	0	0	0	0	0	0	0	0	0	0	0	0
	7	7	7	7	7	7	7	7	7	7	7	7	3	0	0	0	0	3	0	3	3	3	1	4	4	1	4	4	1	1	0	0	0	0	0	0	0	0	0	0	0	0	0	1	0	0	0	0	0
	6	6	6	6	6	6	6	6	6	6	6	6	2	2	2	2	2	2	2	2	1	2	2	2	2	2	2	2	2	2	0	0	0	0	0	0	0	0	0	2	2	0	2	2	2	0	1	2	0
	6	4	6	4	6	7	7	1	7	7	5	4	2	2	1	2	2	2	2	1	1	2	2	1	2	2	2	1	2	3	1	0	0	2	2	1	1	1	1	1	0	0	0	2	2	1	1	0	2
	6	6	6	6	6	6	6	6	6	6	6	6	2	2	1	2	1	2	2	1	1	1	1	1	4	1	1	4	1	1	0	0	2	1	0	0	3	1	0	0	0	0	0	0	0	0	0	0	0
	7	6	7	7	6	5	5	7	5	5	7	5	2	2	3	2	3	2	2	2	2	2	2	2	2	1	1	1	1	1	1	0	0	1	1	0	0	0	0	0	0	0	0	0	0	0	0	0	0
	4	6	7	7	7	7	7	7	7	7	7	7	3	3	3	2	2	2	2	3	3	3	1	3	1	3	3	2	1	3	1	1	2	2	2	0	1	1	0	1	1	1	1	1	1	1	1	0	0
	6	4	2	6	2	2	2	1	2	2	2	2	1	2	1	2	1	2	1	1	1	1	4	4	4	4	4	3	4	4	3	3	2	3	1	2	2	1	0	3	2	0	0	1	0	1	2	2	1
	5	5	6	6	5	5	5	6	5	5	6	5	2	2	2	2	3	2	2	2	2	3	1	1	2	1	1	1	1	1	0	1	0	1	0	0	0	0	0	0	0	0	1	2	1	1	0	1	0
	5	6	6	6	6	6	6	5	5	5	6	6	2	2	1	2	1	2	2	1	2	3	1	3	3	1	1	1	1	1	0	0	0	2	0	0	1	1	0	0	0	0	0	1	1	0	0	0	0
	6	6	7	7	6	6	5	7	7	7	7	7	3	3	3	3	2	3	2	3	3	3	1	1	1	1	1	1	1	1	1	0	0	1	1	0	0	1	0	0	0	0	0	0	0	0	0	0	0
	7	7	7	7	7	7	7	7	7	7	7	7	3	3	3	3	1	2	2	1	2	3	1	1	4	1	1	1	1	1	0	0	0	0	0	0	0	0	0	0	0	0	0	0	0	0	0	0	0
	7	7	7	7	7	7	7	7	7	7	7	7	3	3	0	3	0	3	2	1	1	2	2	2	2	2	2	2	3	3	1	1	1	1	1	2	1	1	1	2	2	2	2	2	2	2	2	1	1
	6	6	6	6	6	6	6	6	6	6	6	6	3	2	3	2	3	2	2	3	3	3	1	1	2	1	1	1	1	1	0	0	0	0	1	0	0	1	0	0	0	0	0	0	0	0	0	0	0
	2	1	7	7	7	7	1	7	1	1	7	1	2	1	0	3	0	3	3	0	0	0	1	4	1	4	4	1	4	4	0	0	0	0	0	2	0	1	0	2	1	1	1	1	1	1	0	2	1
	2	1	7	7	7	7	1	7	1	1	7	1	2	1	0	3	0	3	3	0	0	0	1	4	1	4	4	1	4	4	0	0	0	0	0	2	0	1	0	2	1	1	1	1	1	1	0	2	1
	6	4	6	6	6	6	6	6	6	6	6	1	2	2	3	3	3	2	2	0	3	3	1	2	1	1	1	1	1	1	0	0	0	0	0	0	0	0	0	0	0	0	0	0	0	0	0	0	0
	4	4	6	6	6	6	4	4	4	6	4	6	2	2	2	2	1	2	2	1	3	2	2	3	2	2	3	1	2	2	1	0	1	1	1	0	1	1	0	1	0	0	0	1	2	2	3	2	1
	6	6	7	7	7	7	7	7	7	7	7	7	3	3	1	3	0	3	3	0	0	3	1	4	1	2	1	2	1	2	0	1	2	1	2	2	3	1	2	0	0	2	3	2	1	3	2	1	0
	5	5	5	4	5	5	5	3	5	5	5	4	3	3	2	2	2	3	3	2	2	3	2	2	2	2	2	1	2	2	1	1	1	1	1	0	1	1	0	1	1	0	1	1	1	1	1	1	1
[truncated: 49 more columns]
